# Supplementary material for: Using targeted next-generation sequencing to characterize genetic differences associated with insecticide resistance in Culex quinquefasciatus populations from the southern U.S
Source: PLoS One. 2019 Jul 3;14(7):e0218397. doi: 10.1371/journal.pone.0218397 (PMC6608931; doi:10.1371/journal.pone.0218397)
Supplement: S4 Table — (XLSX) [file pone.0218397.s004.xlsx]

## Sheet: Malathion
S4 Table. Data Set 3 SNPs for Malathion (first sheet) and Permethrin (second sheet), sorted by Cochran Armitage Test for Trend (CATT) p-value.
ID	POS	Gene	REF	ALT	Codon	Alt. Codon	Codon Pos.	# Called	# Heterozygous	# Homozygous Alt. Allele	# Homozygous Ref. Allele	# Ref. Susceptible (Group 1)	# Ref. Resistant (Group 2)	# Heterozygous Alt. Susceptible (Group 1)	# Homozygous Alt. Susceptible (Group 1)	# Heterozygous Alt. Resistant (Group 2)	# Homozygous Alt. Resistant (Group 2)	P-Val., Fisher Exact	FE Statistic	Odds Ratio	Sensitivity	Specificity	AUC (Average Sens,Spec)	Accuracy	P-Val., Cochran-Armitage	Cochran-Armitage Statistic	Heterozygous Alt. Susceptible Samples	Homozygous Alt. Susceptible Samples	Heterozygous Alt. Resistant Samples	Homozygous Alt. Resistant Samples
chr510	164454	CPIJ014218	G	A	GGT (ACC)a	AGT (ACT)	3	118	39	67	12	6	6	18	6	21	61	0.000805655	-0.32659	0.20979	0.931818	0.2	0.565909	0.745763	1.20149e-05	-4.37732	azu1,azu28,azu3,azu5,azu6,txt13,txt19,txt23,txt29,txt35,txu40,txu8,wcu12,wcu15,wcu18,wcu2,wcu20,wcu4	txt3,txt5,wcu1,wcu11,wcu14,wcu6	azu8,hct53,hct60,hcu12,hcu13,hcu30,hcu32,hcu43,not11,not19,not43,nou102,nou107,nou108,txt14,txt26,txt8,txu21,txu31,txu4,wcu8	hct41,hct42,hct43,hct46,hct50,hct51,hct54,hct56,hct61,hct64,hct65,hct66,hcu16,hcu17,hcu18,hcu2,hcu31,hcu5,hcu8,hcu9,not13,not14,not15,not2,not24,not4,not46,not8,nou1,nou124,nou127,nou129,nou130,nou132,nou133,nou134,nou30,nou33,nou39,nou61,txt20,txt36,txt38,txt40,txt7,txu11,txu12,txu13,txu14,txu18,txu2,txu20,txu22,txu3,txu39,txu6,txu7,txu9,wcu16,wcu21,wcu24
chr512	36184	CPIJ013918	C	T	ACC	ATC	2	111	12	42	57	25	32	4	2	8	40	3.94754e-09	-0.355263	0.116364	0.6	0.806452	0.703226	0.657658	2.24999e-05	-4.23852	txt23,txt5,wcu25,wcu4	txt3,wcu6	azu8,hct43,hct46,hct70,hcu8,hcu9,nou33,txu4	azu19,hct41,hct42,hct51,hct53,hct61,hct64,hct73,hcu13,hcu15,hcu16,hcu17,hcu18,hcu2,hcu30,hcu5,not14,not15,not19,not43,not7,nou107,nou124,nou127,nou129,nou130,nou132,nou133,nou30,nou39,txt20,txt36,txt38,txu13,txu20,txu22,txu3,txu9,wcu13,wcu21
chr510	165126	CPIJ014218	G	A	GAC (GTC)	AAC (GTT)	3	119	41	64	14	8	6	16	7	25	57	2.83178e-05	-0.393914	0.161871	0.931818	0.258065	0.594941	0.756303	2.49792e-05	-4.21499	azu1,azu28,azu3,azu5,azu6,txt13,txt19,txt23,txt24,txt29,txt35,txu40,txu8,wcu18,wcu20,wcu4	txt3,txt31,txt5,wcu1,wcu11,wcu14,wcu6	azu8,hct43,hct53,hct60,hct66,hcu12,hcu13,hcu30,hcu32,hcu43,not14,not19,not43,nou102,nou104,nou107,nou108,txt14,txt20,txt26,txt8,txu21,txu31,txu4,wcu8	hct41,hct42,hct46,hct50,hct51,hct54,hct56,hct61,hct64,hct65,hcu16,hcu17,hcu18,hcu2,hcu31,hcu5,hcu8,hcu9,not11,not13,not15,not2,not24,not4,not46,not8,nou1,nou124,nou127,nou129,nou130,nou132,nou133,nou134,nou30,nou33,nou39,nou61,txt36,txt38,txt40,txt7,txu11,txu12,txu14,txu18,txu2,txu20,txu22,txu3,txu39,txu6,txu7,txu9,wcu16,wcu21,wcu24
chr510	164426	CPIJ014218	T	A	GGT (ACC)	GGA (TCC)	1	119	39	68	12	6	6	18	7	21	61	0.00120496	-0.317143	0.223776	0.931818	0.193548	0.562683	0.739496	2.56465e-05	-4.20903	azu1,azu28,azu3,azu5,azu6,txt13,txt19,txt23,txt29,txt35,txu40,txu8,wcu12,wcu15,wcu18,wcu2,wcu20,wcu4	txt24,txt3,txt5,wcu1,wcu11,wcu14,wcu6	azu8,hct53,hct60,hcu12,hcu13,hcu30,hcu32,hcu43,not11,not19,not43,nou102,nou107,nou108,txt14,txt26,txt8,txu21,txu31,txu4,wcu8	hct41,hct42,hct43,hct46,hct50,hct51,hct54,hct56,hct61,hct64,hct65,hct66,hcu16,hcu17,hcu18,hcu2,hcu31,hcu5,hcu8,hcu9,not13,not14,not15,not2,not24,not4,not46,not8,nou1,nou124,nou127,nou129,nou130,nou132,nou133,nou134,nou30,nou33,nou39,nou61,txt20,txt36,txt38,txt40,txt7,txu11,txu12,txu13,txu14,txu18,txu2,txu20,txu22,txu3,txu39,txu6,txu7,txu9,wcu16,wcu21,wcu24
chr510	164412	CPIJ014218	A	G	ACC (GGT)	GCC (GGC)	3	119	39	68	12	6	6	18	7	21	61	0.00120496	-0.317143	0.223776	0.931818	0.193548	0.562683	0.739496	2.56465e-05	-4.20903	azu1,azu28,azu3,azu5,azu6,txt13,txt19,txt23,txt29,txt35,txu40,txu8,wcu12,wcu15,wcu18,wcu2,wcu20,wcu4	txt24,txt3,txt5,wcu1,wcu11,wcu14,wcu6	azu8,hct53,hct60,hcu12,hcu13,hcu30,hcu32,hcu43,not11,not19,not43,nou102,nou107,nou108,txt14,txt26,txt8,txu21,txu31,txu4,wcu8	hct41,hct42,hct43,hct46,hct50,hct51,hct54,hct56,hct61,hct64,hct65,hct66,hcu16,hcu17,hcu18,hcu2,hcu31,hcu5,hcu8,hcu9,not13,not14,not15,not2,not24,not4,not46,not8,nou1,nou124,nou127,nou129,nou130,nou132,nou133,nou134,nou30,nou33,nou39,nou61,txt20,txt36,txt38,txt40,txt7,txu11,txu12,txu13,txu14,txu18,txu2,txu20,txu22,txu3,txu39,txu6,txu7,txu9,wcu16,wcu21,wcu24
chr510	164418	CPIJ014218	T	C	TTG (CAA)	CTG (CAG)	3	119	39	68	12	6	6	18	7	21	61	0.00120496	-0.317143	0.223776	0.931818	0.193548	0.562683	0.739496	2.56465e-05	-4.20903	azu1,azu28,azu3,azu5,azu6,txt13,txt19,txt23,txt29,txt35,txu40,txu8,wcu12,wcu15,wcu18,wcu2,wcu20,wcu4	txt24,txt3,txt5,wcu1,wcu11,wcu14,wcu6	azu8,hct53,hct60,hcu12,hcu13,hcu30,hcu32,hcu43,not11,not19,not43,nou102,nou107,nou108,txt14,txt26,txt8,txu21,txu31,txu4,wcu8	hct41,hct42,hct43,hct46,hct50,hct51,hct54,hct56,hct61,hct64,hct65,hct66,hcu16,hcu17,hcu18,hcu2,hcu31,hcu5,hcu8,hcu9,not13,not14,not15,not2,not24,not4,not46,not8,nou1,nou124,nou127,nou129,nou130,nou132,nou133,nou134,nou30,nou33,nou39,nou61,txt20,txt36,txt38,txt40,txt7,txu11,txu12,txu13,txu14,txu18,txu2,txu20,txu22,txu3,txu39,txu6,txu7,txu9,wcu16,wcu21,wcu24
chr510	164427	CPIJ014218	A	G	AAC (GTT)	GAC (GTC)	3	119	39	68	12	6	6	18	7	21	61	0.00120496	-0.317143	0.223776	0.931818	0.193548	0.562683	0.739496	2.56465e-05	-4.20903	azu1,azu28,azu3,azu5,azu6,txt13,txt19,txt23,txt29,txt35,txu40,txu8,wcu12,wcu15,wcu18,wcu2,wcu20,wcu4	txt24,txt3,txt5,wcu1,wcu11,wcu14,wcu6	azu8,hct53,hct60,hcu12,hcu13,hcu30,hcu32,hcu43,not11,not19,not43,nou102,nou107,nou108,txt14,txt26,txt8,txu21,txu31,txu4,wcu8	hct41,hct42,hct43,hct46,hct50,hct51,hct54,hct56,hct61,hct64,hct65,hct66,hcu16,hcu17,hcu18,hcu2,hcu31,hcu5,hcu8,hcu9,not13,not14,not15,not2,not24,not4,not46,not8,nou1,nou124,nou127,nou129,nou130,nou132,nou133,nou134,nou30,nou33,nou39,nou61,txt20,txt36,txt38,txt40,txt7,txu11,txu12,txu13,txu14,txu18,txu2,txu20,txu22,txu3,txu39,txu6,txu7,txu9,wcu16,wcu21,wcu24
chr512	34656	CPIJ013918	T	A	AGT	AGA	3	115	24	31	60	28	32	4	2	20	29	3.31694e-09	-0.373643	0.117216	0.604938	0.823529	0.714234	0.669565	3.23667e-05	-4.15614	txt23,txt5,wcu25,wcu4	txt3,wcu6	azu19,azu8,hct41,hct46,hct53,hct61,hct66,hct70,hct73,hcu12,hcu2,hcu8,not46,nou102,nou33,txt38,txu13,txu3,txu4,wcu13	hct42,hct51,hct64,hcu13,hcu15,hcu16,hcu17,hcu18,hcu30,hcu5,hcu9,not14,not15,not43,not7,nou107,nou124,nou127,nou129,nou130,nou132,nou133,nou30,nou39,txt20,txt36,txu20,txu22,txu9
chr512	31057	CPIJ013917	C	T	TCT (AGA)	TTT (AAA)	2	125	22	49	54	25	29	5	5	17	44	1.40543e-08	-0.337963	0.165714	0.677778	0.714286	0.696032	0.688	4.71409e-05	-4.06937	txt24,txt5,wcu1,wcu25,wcu4	sebq,txt21,txt23,txt3,wcu6	azu19,azu8,hct46,hct50,hct54,hct66,hct70,hcu8,not2,not46,nou104,nou134,txt26,txt7,txu18,txu4,wcu21	hct41,hct42,hct51,hct53,hct61,hct64,hct73,hcu12,hcu13,hcu15,hcu16,hcu17,hcu18,hcu2,hcu30,hcu5,hcu9,not14,not15,not43,not7,not8,nou107,nou108,nou124,nou127,nou129,nou130,nou132,nou133,nou30,nou33,nou39,nou61,txt20,txt36,txt38,txu13,txu20,txu22,txu3,txu9,wcu13,wcu24
chr512	35176	CPIJ013918	C	T	CGC	CGT	3	122	21	38	63	29	34	2	4	19	34	4.70279e-09	-0.357225	0.13476	0.609195	0.828571	0.718883	0.672131	6.10122e-05	-4.00886	txt5,wcu25	txt23,txt3,wcu4,wcu6	azu19,azu8,hct46,hct60,hct61,hct66,hct70,hcu2,hcu8,not11,nou102,nou104,nou33,txt38,txu3,txu39,txu4,wcu13,wcu16	hct41,hct42,hct51,hct53,hct64,hct73,hcu13,hcu15,hcu16,hcu17,hcu18,hcu30,hcu5,hcu9,not14,not15,not43,not46,not7,nou107,nou124,nou127,nou129,nou130,nou132,nou133,nou30,nou39,txt20,txt36,txu13,txu20,txu22,txu9
chr512	35191	CPIJ013918	A	C	TCA	TCC	3	122	36	72	14	10	4	12	13	24	59	2.7386e-07	-0.503175	0.107042	0.954023	0.285714	0.619869	0.762295	8.53432e-05	-3.92888	txt13,txt19,txt24,txt29,txt35,txt5,txu40,wcu10,wcu14,wcu15,wcu17,wcu5	not40,sebq,txt21,txt23,txt3,txt39,txu8,wcu1,wcu12,wcu19,wcu25,wcu4,wcu6	azu8,hct46,hct54,hct56,hct60,hct61,hct66,hct70,hcu8,nou1,nou102,nou104,txt14,txt7,txt8,txu11,txu12,txu18,txu31,txu39,txu4,txu43,txu7,wcu13	azu19,hct41,hct42,hct43,hct50,hct51,hct53,hct64,hct73,hcu12,hcu13,hcu15,hcu16,hcu17,hcu18,hcu2,hcu30,hcu32,hcu43,hcu5,hcu9,not11,not13,not14,not15,not2,not24,not43,not46,not7,not8,nou107,nou108,nou124,nou127,nou129,nou130,nou132,nou133,nou134,nou30,nou33,nou39,nou61,txt20,txt26,txt36,txt38,txt40,txu13,txu14,txu2,txu20,txu22,txu3,txu9,wcu16,wcu21,wcu24
chr512	35479	CPIJ013918	G	A	AAG	AAA	3	118	40	35	43	21	22	10	3	30	32	2.62106e-07	-0.342918	0.178318	0.738095	0.617647	0.677871	0.70339	8.82323e-05	-3.92086	azu1,azu6,txt13,txt19,txt23,txt5,txu8,wcu19,wcu25,wcu4	not40,txt3,wcu6	azu19,azu8,hct41,hct42,hct46,hct53,hct56,hct61,hct66,hct70,hct73,hcu12,hcu2,hcu5,hcu8,hcu9,not4,not46,nou39,nou61,txt20,txt38,txt40,txt8,txu11,txu18,txu3,txu4,txu7,wcu13	hct51,hct64,hcu13,hcu15,hcu16,hcu17,hcu18,hcu30,hcu43,not13,not14,not15,not19,not2,not24,not43,not7,nou107,nou124,nou127,nou129,nou130,nou132,nou133,nou30,nou33,txt26,txt36,txu13,txu20,txu22,txu9
chr171	149991	CPIJ007825	A	C	GGA	GGC	3	120	32	77	11	7	4	14	13	18	64	8.80264e-05	-0.42131	0.156556	0.953488	0.205882	0.579685	0.741667	9.48831e-05	-3.90332	azu28,azu5,txt19,txt24,txt29,txt31,txt39,txu8,wcu11,wcu15,wcu19,wcu2,wcu25,wcu4	not40,sebq,txt13,txt23,txt3,txt5,wcu12,wcu14,wcu17,wcu18,wcu20,wcu5,wcu6	azu19,hct41,hct66,hcu16,hcu18,nou124,nou129,nou134,nou30,txt14,txt40,txt8,txu12,txu18,txu3,txu4,txu6,txu9	hct42,hct43,hct46,hct50,hct51,hct53,hct54,hct56,hct60,hct64,hct70,hct73,hcu12,hcu13,hcu15,hcu17,hcu2,hcu30,hcu31,hcu43,hcu5,hcu8,hcu9,not11,not13,not14,not15,not19,not2,not24,not4,not43,not46,not7,not8,nou1,nou102,nou104,nou107,nou108,nou127,nou130,nou132,nou133,nou33,nou39,nou61,txt20,txt26,txt36,txt38,txt7,txu11,txu14,txu2,txu20,txu21,txu22,txu31,txu39,txu7,wcu13,wcu24,wcu8
chr512	35545	CPIJ013918	C	T	ATC	ATT	3	101	17	41	43	21	22	5	4	12	37	1.35611e-07	-0.357059	0.158361	0.690141	0.7	0.69507	0.693069	9.66569e-05	-3.89883	txt29,txt35,txt5,wcu1,wcu4	txt23,txt3,wcu25,wcu6	azu19,azu8,hct41,hct46,hct61,hct70,hct73,hcu2,hcu8,hcu9,txt38,txu4	hct42,hct51,hct53,hct64,hcu13,hcu15,hcu16,hcu17,hcu18,hcu30,hcu5,not14,not15,not24,not43,not7,nou107,nou108,nou124,nou127,nou129,nou130,nou132,nou133,nou30,nou33,nou39,txt20,txt36,txu13,txu14,txu20,txu22,txu3,txu6,txu9,wcu13
chr510	164376	CPIJ014218	G	A	GCG (CGC)	ACG (CGT)	3	117	42	63	12	6	6	18	7	24	56	0.00291872	-0.309524	0.235294	0.930233	0.193548	0.56189	0.735043	0.000101707	-3.88648	azu1,azu28,azu3,azu5,azu6,txt13,txt19,txt23,txt29,txt35,txu40,txu8,wcu12,wcu15,wcu18,wcu2,wcu20,wcu4	txt24,txt3,txt5,wcu1,wcu11,wcu14,wcu6	azu8,hct53,hct60,hcu12,hcu13,hcu17,hcu30,hcu32,hcu43,hcu9,not11,not19,not43,nou102,nou107,nou108,txt14,txt26,txt8,txu21,txu31,txu39,txu4,wcu8	hct41,hct42,hct43,hct46,hct50,hct51,hct54,hct56,hct61,hct64,hct65,hct66,hcu16,hcu18,hcu2,hcu31,hcu5,hcu8,not13,not15,not2,not24,not4,not46,not8,nou1,nou124,nou127,nou129,nou130,nou132,nou133,nou134,nou30,nou33,nou39,nou61,txt20,txt36,txt38,txt40,txt7,txu11,txu12,txu13,txu14,txu18,txu2,txu20,txu22,txu3,txu6,txu9,wcu16,wcu21,wcu24
chr512	35464	CPIJ013918	A	G	GAA	GAG	3	120	61	13	46	23	23	11	1	50	12	5.7474e-07	-0.350575	0.175676	0.729412	0.657143	0.693277	0.708333	0.000124479	-3.83713	azu1,txt13,txt19,txt23,txt3,txt5,txu8,wcu19,wcu25,wcu4,wcu6	not40	azu19,azu8,hct41,hct42,hct46,hct51,hct53,hct56,hct61,hct64,hct66,hct70,hct73,hcu12,hcu15,hcu16,hcu2,hcu30,hcu5,hcu8,hcu9,not15,not4,not46,not7,nou124,nou127,nou129,nou130,nou132,nou133,nou30,nou33,nou39,nou61,txt20,txt36,txt38,txt40,txt8,txu11,txu13,txu18,txu20,txu22,txu3,txu4,txu7,txu9,wcu13	hcu13,hcu17,hcu18,hcu43,not13,not14,not19,not2,not24,not43,nou107,txt26
chr512	35069	CPIJ013918	T	A	TAC	AAC	1	113	27	44	42	20	22	8	5	19	39	1.45068e-06	-0.319669	0.204124	0.725	0.606061	0.66553	0.690265	0.000233083	-3.68017	txt13,txt24,txt29,txt35,txt5,wcu1,wcu25,wcu4	txt21,txt23,txt3,txu8,wcu6	azu19,azu8,hct46,hct54,hct61,hct66,hct70,hcu2,hcu5,hcu8,nou102,nou104,txt38,txt7,txu13,txu18,txu3,txu4,wcu13	hct41,hct42,hct43,hct50,hct51,hct53,hct64,hct73,hcu12,hcu13,hcu15,hcu16,hcu17,hcu18,hcu30,hcu9,not14,not15,not43,not46,not7,nou107,nou124,nou127,nou129,nou130,nou132,nou133,nou30,nou39,nou61,txt20,txt26,txt36,txu14,txu20,txu22,txu9,wcu24
chr512	30930	CPIJ013917	T	A	TAT (ATA)	AAT (ATT)	3	113	37	25	51	25	26	6	3	31	22	2.01439e-07	-0.352265	0.1664	0.670886	0.735294	0.70309	0.690265	0.000235354	-3.67769	txt23,txt24,txt5,wcu1,wcu25,wcu4	txt21,txt3,wcu6	azu19,azu8,hct46,hct50,hct51,hct53,hct54,hct66,hct70,hct73,hcu15,hcu2,hcu5,hcu8,nou107,nou127,nou129,nou130,nou132,nou133,nou30,nou39,txt26,txt36,txt7,txu13,txu18,txu3,txu4,wcu13,wcu24	hct41,hct42,hct64,hcu12,hcu13,hcu16,hcu17,hcu18,hcu30,hcu9,not14,not15,not2,not43,not46,not7,nou124,txt20,txt38,txu20,txu22,txu9
chr512	34683	CPIJ013918	C	T	TTC	TTT	3	106	12	40	54	25	29	1	5	11	35	9.87233e-08	-0.343398	0.157531	0.613333	0.806452	0.709892	0.669811	0.000288682	-3.62525	wcu25	txt23,txt3,txt5,wcu4,wcu6	azu19,azu8,hct46,hct66,hct70,hcu12,hcu8,not46,nou102,txt38,txu4	hct41,hct42,hct51,hct53,hct64,hct73,hcu13,hcu15,hcu16,hcu17,hcu18,hcu30,hcu5,hcu9,not14,not15,not43,not7,nou107,nou124,nou127,nou129,nou130,nou132,nou133,nou30,nou39,txt20,txt36,txu13,txu20,txu22,txu3,txu9,wcu13
chr512	35482	CPIJ013918	T	A	AAT	AAA	3	118	29	24	65	28	37	4	2	25	22	4.07552e-07	-0.326873	0.153209	0.559524	0.823529	0.691527	0.635593	0.000309122	-3.60753	txt23,txt5,wcu25,wcu4	txt3,wcu6	azu19,azu8,hct41,hct42,hct46,hct53,hct61,hct70,hct73,hcu12,hcu2,hcu5,hcu8,hcu9,not15,not46,nou130,nou39,txt20,txt36,txt38,txu20,txu3,txu4,wcu13	hct51,hct64,hcu13,hcu15,hcu16,hcu17,hcu18,hcu30,not14,not19,not43,not7,nou107,nou124,nou127,nou129,nou132,nou133,nou30,txu13,txu22,txu9
chr512	35443	CPIJ013918	C	T	TTC	TTT	3	117	28	40	49	20	29	12	2	16	38	3.69641e-05	-0.260015	0.252174	0.650602	0.588235	0.619419	0.632479	0.000330297	-3.5903	txt13,txt19,txt23,txt29,txt35,txt5,txu8,wcu1,wcu12,wcu19,wcu25,wcu4	txt3,wcu6	azu8,hct41,hct42,hct46,hct53,hct66,hct73,hcu12,hcu8,not46,txt38,txt8,txu11,txu14,txu4,txu7	azu19,hct51,hct61,hct64,hct70,hcu13,hcu15,hcu16,hcu17,hcu18,hcu2,hcu30,hcu5,hcu9,not14,not15,not19,not43,not7,nou107,nou124,nou127,nou129,nou130,nou132,nou133,nou30,nou33,nou39,txt20,txt26,txt36,txu13,txu20,txu22,txu3,txu9,wcu13
chr512	31284	CPIJ013917	T	C	TCC (GGA)	CCC (GGG)	3	123	19	45	59	25	34	4	5	15	40	7.42642e-07	-0.295288	0.200421	0.617978	0.735294	0.676636	0.650407	0.00038592	-3.54953	txt21,txt24,txt5,wcu1	txt23,txt3,wcu25,wcu4,wcu6	azu19,hct50,hct66,hcu12,hcu17,hcu8,not46,nou102,nou104,nou107,txt26,txt36,txt7,txu18,txu4	azu8,hct41,hct42,hct46,hct51,hct53,hct54,hct61,hct64,hct70,hct73,hcu13,hcu15,hcu16,hcu18,hcu2,hcu30,hcu5,hcu9,not14,not15,not43,not7,nou124,nou127,nou129,nou130,nou132,nou133,nou30,nou39,txt20,txt38,txu13,txu20,txu22,txu3,txu9,wcu13,wcu24
chr512	35761	CPIJ013918	C	T	CTC	CTT	3	101	21	44	36	17	19	9	5	12	39	2.45981e-05	-0.29791	0.235948	0.728571	0.548387	0.638479	0.673267	0.000464189	-3.50061	txt13,txt23,txt29,txt35,txt5,txu8,wcu14,wcu25,wcu4	txt3,txt39,wcu1,wcu19,wcu6	azu8,hct41,hct42,hct46,hct53,hct70,hct73,hcu8,hcu9,txt20,txu3,txu4	azu19,hct50,hct51,hct61,hct64,hcu13,hcu15,hcu16,hcu17,hcu18,hcu2,hcu30,hcu32,hcu5,not14,not15,not43,not46,not7,nou107,nou124,nou127,nou129,nou130,nou132,nou133,nou30,nou39,txt26,txt36,txt38,txt40,txu13,txu14,txu2,txu20,txu22,txu9,wcu13
chr512	30203	CPIJ013917	G	A	GTC (GAC)	ATC (GAT)	3	110	24	49	37	17	20	11	6	13	43	8.32562e-05	-0.270935	0.273321	0.736842	0.5	0.618421	0.663636	0.000575405	-3.44295	azu1,azu28,azu3,azu5,azu6,txt29,txu40,txu8,wcu15,wcu17,wcu5	txt23,txt3,txt5,wcu25,wcu4,wcu6	azu19,hct50,hct56,hct61,hct66,hcu16,nou1,txu12,txu14,txu2,txu31,txu39,txu43	azu8,hct41,hct42,hct46,hct51,hct53,hct64,hct70,hct73,hcu13,hcu15,hcu17,hcu18,hcu2,hcu30,hcu5,hcu8,hcu9,not14,not15,not43,not46,not7,nou107,nou124,nou127,nou129,nou130,nou132,nou133,nou30,nou39,txt20,txt36,txt38,txu13,txu20,txu22,txu3,txu4,txu9,wcu13,wcu16
chr171	149945	CPIJ007825	T	A	CTG	CAG	2	123	44	28	51	23	28	9	3	35	25	3.30085e-06	-0.30098	0.214834	0.681818	0.657143	0.669481	0.674797	0.000589701	-3.43631	azu5,txt23,txt24,txt31,txu8,wcu11,wcu12,wcu15,wcu20	not40,txt3,wcu6	hct41,hct42,hct46,hct50,hct51,hct53,hct54,hct60,hct73,hcu12,hcu2,hcu30,hcu31,hcu5,hcu8,not11,not14,not43,nou124,nou127,nou129,nou134,nou30,nou39,nou61,txt20,txt26,txt40,txt7,txu12,txu2,txu20,txu39,txu6,txu9	hct43,hct70,hcu15,hcu43,hcu9,not13,not19,not2,not24,not4,not46,not7,not8,nou1,nou102,nou104,nou107,nou108,nou130,nou132,nou133,nou33,txt38,txu11,txu7
chr171	149968	CPIJ007825	A	G	AAC	GAC	1	123	44	28	51	23	28	9	3	35	25	3.30085e-06	-0.30098	0.214834	0.681818	0.657143	0.669481	0.674797	0.000589701	-3.43631	azu5,txt23,txt24,txt31,txu8,wcu11,wcu12,wcu15,wcu20	not40,txt3,wcu6	hct41,hct42,hct46,hct50,hct51,hct53,hct54,hct60,hct73,hcu12,hcu2,hcu30,hcu31,hcu5,hcu8,not11,not14,not43,nou124,nou127,nou129,nou134,nou30,nou39,nou61,txt20,txt26,txt40,txt7,txu12,txu2,txu20,txu39,txu6,txu9	hct43,hct70,hcu15,hcu43,hcu9,not13,not19,not2,not24,not4,not46,not7,not8,nou1,nou102,nou104,nou107,nou108,nou130,nou132,nou133,nou33,txt38,txu11,txu7
chr510	164957	CPIJ014218	A	T	GAA (TTC)	GAT (ATC)	1	113	22	79	12	6	6	10	12	12	67	0.00151379	-0.311111	0.232877	0.929412	0.214286	0.571849	0.752212	0.000639712	-3.41419	azu6,txt13,txt19,txt23,txt35,txu8,wcu15,wcu18,wcu2,wcu5	azu1,azu5,txt29,txt3,txt5,txu40,wcu1,wcu11,wcu12,wcu14,wcu4,wcu6	azu8,hct53,hct60,hcu13,hcu30,hcu43,not43,nou108,txt26,txt8,txu21,txu4	hct41,hct42,hct43,hct46,hct50,hct51,hct54,hct56,hct61,hct64,hct65,hct66,hcu12,hcu16,hcu17,hcu18,hcu31,hcu5,hcu8,hcu9,not11,not13,not15,not19,not2,not24,not4,not46,not8,nou1,nou104,nou107,nou124,nou127,nou129,nou130,nou132,nou133,nou134,nou30,nou33,nou39,nou61,txt14,txt20,txt36,txt38,txt40,txt7,txu11,txu12,txu13,txu14,txu18,txu2,txu20,txu22,txu3,txu31,txu39,txu6,txu7,txu9,wcu16,wcu21,wcu24,wcu8
chr39	62051	CPIJ003082	A	G	AAG	AGG	2	125	55	61	9	5	4	21	9	34	52	0.00371626	-0.335217	0.226087	0.955556	0.142857	0.549206	0.728	0.000756659	-3.36818	azu3,azu5,azu6,not40,txt19,txt21,txt23,txt3,txt31,txt39,txt5,txu40,txu8,wcu11,wcu12,wcu18,wcu19,wcu2,wcu20,wcu4,wcu6	txt13,txt24,txt29,txt35,wcu1,wcu10,wcu17,wcu25,wcu5	hct50,hct51,hct56,hct61,hct65,hct66,hct70,hcu13,hcu16,hcu2,hcu31,not11,not15,not46,not7,not8,nou107,nou108,nou127,nou132,nou33,nou61,txt14,txt20,txt7,txu13,txu18,txu22,txu3,txu31,txu39,txu4,txu43,txu9	hct41,hct42,hct43,hct46,hct53,hct54,hct60,hct64,hct73,hcu12,hcu17,hcu18,hcu30,hcu32,hcu43,hcu5,hcu9,not13,not14,not19,not2,not24,not4,not43,nou1,nou102,nou104,nou124,nou129,nou130,nou133,nou134,nou30,nou39,txt26,txt36,txt38,txt40,txt8,txu11,txu12,txu14,txu2,txu20,txu21,txu6,txu7,wcu13,wcu16,wcu21,wcu24,wcu8
chr510	165402	CPIJ014218	C	T	CGG (CCG)	TGG (CCA)	3	123	36	75	12	6	6	15	12	21	63	0.00410118	-0.290323	0.265306	0.933333	0.181818	0.557576	0.731707	0.000924598	-3.31252	azu28,azu3,azu5,txt13,txt19,txt23,txt24,txt29,txu40,txu8,wcu15,wcu19,wcu2,wcu20,wcu4	azu1,azu6,txt3,txt31,txt35,txt5,wcu1,wcu11,wcu12,wcu14,wcu18,wcu6	azu8,hct43,hct53,hct60,hct73,hcu12,hcu13,hcu30,hcu32,hcu43,not14,not19,nou102,nou104,nou107,nou108,txt14,txt26,txu31,txu4,wcu8	hct41,hct42,hct46,hct50,hct51,hct54,hct56,hct61,hct64,hct65,hct66,hcu16,hcu17,hcu18,hcu2,hcu31,hcu5,hcu8,hcu9,not11,not13,not15,not2,not24,not4,not43,not46,not8,nou1,nou124,nou127,nou129,nou130,nou132,nou133,nou134,nou30,nou33,nou39,nou61,txt20,txt36,txt38,txt40,txt7,txt8,txu11,txu12,txu13,txu14,txu18,txu2,txu20,txu21,txu22,txu3,txu39,txu6,txu7,txu9,wcu16,wcu21,wcu24
chr171	149931	CPIJ007825	C	T	CTC	CTT	3	125	32	6	87	33	54	2	0	30	6	3.30132e-06	-0.333856	0.0779221	0.4	0.942857	0.671429	0.552	0.000955811	-3.30322	txt24,wcu15		hct41,hct50,hct51,hct53,hct54,hct70,hcu12,hcu15,hcu31,not13,not14,not19,not43,not7,not8,nou1,nou102,nou124,nou127,nou129,nou132,nou133,nou39,txt20,txt26,txt7,txu12,txu2,txu39,txu6	hct43,hcu43,hcu9,not2,not4,nou104
chr510	165471	CPIJ014218	C	T	CTT (AAG)	TTT (AAA)	3	121	38	72	11	6	5	15	12	23	60	0.00277712	-0.331169	0.227273	0.943182	0.181818	0.5625	0.735537	0.00100059	-3.29036	azu28,azu3,azu5,txt13,txt19,txt23,txt24,txt29,txu40,txu8,wcu15,wcu19,wcu2,wcu20,wcu4	azu1,azu6,txt3,txt31,txt35,txt5,wcu1,wcu11,wcu12,wcu14,wcu18,wcu6	azu8,hct43,hct53,hct60,hct66,hct73,hcu12,hcu13,hcu30,hcu32,hcu43,not14,not19,nou102,nou104,nou107,nou108,txt14,txt26,txu18,txu31,txu4,wcu8	hct41,hct42,hct46,hct50,hct51,hct54,hct56,hct61,hct64,hcu16,hcu17,hcu18,hcu2,hcu31,hcu5,hcu8,hcu9,not11,not13,not15,not2,not24,not4,not43,not46,not8,nou1,nou124,nou127,nou129,nou130,nou132,nou133,nou134,nou30,nou33,nou39,nou61,txt20,txt36,txt38,txt40,txt7,txt8,txu11,txu12,txu13,txu14,txu2,txu20,txu21,txu22,txu3,txu39,txu6,txu7,txu9,wcu16,wcu21,wcu24
chr512	35251	CPIJ013918	G	C	GCG	GCC	3	113	11	98	4	3	1	7	24	4	74	0.00729701	-0.4843	0.120614	0.987342	0.0882353	0.537789	0.716814	0.00119421	-3.24026	azu1,azu28,azu3,azu6,wcu14,wcu18,wcu20	not40,sebq,txt13,txt19,txt21,txt23,txt24,txt29,txt3,txt31,txt35,txt39,txt5,txu40,txu8,wcu1,wcu12,wcu15,wcu17,wcu19,wcu25,wcu4,wcu5,wcu6	hct56,txu12,txu21,wcu8	azu19,azu8,hct41,hct42,hct46,hct50,hct51,hct53,hct54,hct61,hct64,hct66,hct70,hct73,hcu12,hcu13,hcu15,hcu16,hcu17,hcu18,hcu2,hcu30,hcu31,hcu32,hcu5,hcu8,hcu9,not11,not13,not14,not15,not24,not43,not46,not7,nou1,nou102,nou104,nou107,nou108,nou124,nou127,nou129,nou130,nou132,nou133,nou30,nou39,nou61,txt14,txt20,txt26,txt36,txt38,txt40,txt7,txt8,txu11,txu13,txu14,txu18,txu2,txu20,txu22,txu3,txu31,txu3…
chr171	149913	CPIJ007825	T	C	TTT	TTC	3	125	49	24	52	23	29	9	3	40	21	1.32129e-05	-0.287669	0.230647	0.677778	0.657143	0.66746	0.672	0.00123668	-3.23028	azu5,txt23,txt24,txt31,txu8,wcu11,wcu12,wcu15,wcu20	not40,txt3,wcu6	hct41,hct42,hct46,hct50,hct51,hct53,hct54,hct60,hct65,hct73,hcu12,hcu2,hcu30,hcu31,hcu5,hcu8,hcu9,not11,not14,not43,nou124,nou127,nou129,nou130,nou134,nou30,nou39,nou61,txt20,txt26,txt40,txt7,txu11,txu12,txu2,txu20,txu39,txu6,txu7,txu9	hct43,hct70,hcu15,hcu43,not13,not19,not2,not24,not4,not46,not7,not8,nou1,nou102,nou104,nou107,nou108,nou132,nou133,nou33,txt38
chr171	149726	CPIJ007825	A	C	GAG	GCG	2	122	50	27	45	20	25	11	3	39	24	3.11922e-05	-0.280983	0.244253	0.715909	0.588235	0.652072	0.680328	0.00139108	-3.1965	azu5,txt23,txu8,wcu1,wcu11,wcu12,wcu15,wcu17,wcu2,wcu20,wcu5	not40,txt3,wcu6	hct42,hct46,hct50,hct51,hct54,hct60,hct64,hct65,hct73,hcu12,hcu13,hcu30,hcu31,hcu5,hcu8,not11,not15,not43,nou127,nou129,nou134,nou30,nou39,txt20,txt26,txt36,txt40,txt7,txu11,txu12,txu20,txu22,txu3,txu39,txu6,txu7,txu9,wcu24,wcu8	hct43,hct70,hcu15,hcu2,hcu43,hcu9,not13,not19,not2,not24,not4,not46,not7,not8,nou1,nou102,nou107,nou108,nou130,nou132,nou133,nou33,nou61,txt38
chr171	149730	CPIJ007825	C	G	AAC	AAG	3	122	50	27	45	20	25	11	3	39	24	3.11922e-05	-0.280983	0.244253	0.715909	0.588235	0.652072	0.680328	0.00139108	-3.1965	azu5,txt23,txu8,wcu1,wcu11,wcu12,wcu15,wcu17,wcu2,wcu20,wcu5	not40,txt3,wcu6	hct42,hct46,hct50,hct51,hct54,hct60,hct64,hct65,hct73,hcu12,hcu13,hcu30,hcu31,hcu5,hcu8,not11,not15,not43,nou127,nou129,nou134,nou30,nou39,txt20,txt26,txt36,txt40,txt7,txu11,txu12,txu20,txu22,txu3,txu39,txu6,txu7,txu9,wcu24,wcu8	hct43,hct70,hcu15,hcu2,hcu43,hcu9,not13,not19,not2,not24,not4,not46,not7,not8,nou1,nou102,nou107,nou108,nou130,nou132,nou133,nou33,nou61,txt38
chr247	463453	CPIJ009473	C	T	CTG	TTG	1	49	1	44	4	3	1	1	6	0	38	0.000591497	-0.603933	0.0570175	0.974359	0.3	0.637179	0.836735	0.00146699	-3.18114	wcu4	azu28,txt19,txt29,txt39,txu8,wcu20		azu19,azu8,hct42,hct50,hct51,hct54,hct60,hct64,hct73,hcu12,hcu13,hcu15,hcu16,hcu17,hcu2,hcu30,hcu32,hcu8,hcu9,not14,not15,not19,not46,nou129,nou134,nou30,nou33,txt36,txt38,txt7,txt8,txu11,txu12,txu20,txu21,txu3,txu31,txu7
chr247	463446	CPIJ009473	T	C	TTT	TTC	3	49	1	44	4	3	1	1	6	0	38	0.000591497	-0.603933	0.0570175	0.974359	0.3	0.637179	0.836735	0.00146699	-3.18114	wcu4	azu28,txt19,txt29,txt39,txu8,wcu20		azu19,azu8,hct42,hct50,hct51,hct54,hct60,hct64,hct73,hcu12,hcu13,hcu15,hcu16,hcu17,hcu2,hcu30,hcu32,hcu8,hcu9,not14,not15,not19,not46,nou129,nou134,nou30,nou33,txt36,txt38,txt7,txt8,txu11,txu12,txu20,txu21,txu3,txu31,txu7
chr247	463452	CPIJ009473	T	C	ATT	ATC	3	49	1	44	4	3	1	1	6	0	38	0.000591497	-0.603933	0.0570175	0.974359	0.3	0.637179	0.836735	0.00146699	-3.18114	wcu4	azu28,txt19,txt29,txt39,txu8,wcu20		azu19,azu8,hct42,hct50,hct51,hct54,hct60,hct64,hct73,hcu12,hcu13,hcu15,hcu16,hcu17,hcu2,hcu30,hcu32,hcu8,hcu9,not14,not15,not19,not46,nou129,nou134,nou30,nou33,txt36,txt38,txt7,txt8,txu11,txu12,txu20,txu21,txu3,txu31,txu7
chr510	164256	CPIJ014218	G	A	GAT (ATC)	AAT (ATT)	3	120	63	35	22	12	10	16	5	47	30	2.84445e-05	-0.349966	0.202492	0.885057	0.363636	0.624347	0.741667	0.00156059	-3.16317	azu1,azu3,azu6,txt13,txt19,txt23,txt24,txt29,txt3,txt5,txu40,txu8,wcu18,wcu2,wcu4,wcu6	azu28,txt31,wcu1,wcu11,wcu14	hct43,hct50,hct51,hct53,hct60,hct61,hct66,hcu12,hcu13,hcu16,hcu18,hcu30,hcu32,not13,not14,not19,not24,not43,not46,not8,nou1,nou102,nou104,nou107,nou108,nou127,nou129,nou130,nou132,nou33,nou39,txt14,txt20,txt26,txt36,txt38,txt8,txu11,txu18,txu2,txu21,txu31,txu39,txu4,txu7,txu9,wcu8	hct41,hct42,hct46,hct54,hct56,hct64,hcu17,hcu2,hcu31,hcu5,hcu8,hcu9,not11,not15,not2,not4,nou133,nou134,nou30,nou61,txt40,txt7,txu12,txu14,txu20,txu22,txu3,txu6,wcu21,wcu24
chr631	190184	CPIJ015248	C	G	TCC	TCG	3	125	28	8	89	34	55	0	1	28	7	3.10917e-06	-0.336568	0.0770308	0.388889	0.971429	0.680159	0.552	0.00156788	-3.16182		txt39	hct42,hct43,hct61,hct64,hct66,hct70,hct73,hcu12,hcu16,hcu18,hcu43,not13,not14,not8,nou104,nou130,nou134,nou30,txt14,txt36,txt40,txt7,txu13,txu3,txu31,txu43,txu6,wcu13	hct51,hcu30,not24,nou102,txu14,txu2,txu21
chr512	31696	CPIJ013917	T	A	CGT (ACG)	CGA (TCG)	1	121	10	48	63	24	39	1	6	9	42	1.04378e-05	-0.258311	0.227151	0.566667	0.774194	0.67043	0.619835	0.00199191	-3.09144	txu40	txt23,txt3,txt5,wcu25,wcu4,wcu6	hct56,hct66,not13,not46,nou130,nou33,txt36,txu21,txu4	azu19,azu8,hct41,hct42,hct46,hct51,hct53,hct61,hct64,hct70,hct73,hcu13,hcu15,hcu16,hcu17,hcu18,hcu2,hcu30,hcu5,hcu8,hcu9,not14,not15,not43,not7,nou104,nou107,nou124,nou127,nou129,nou132,nou133,nou30,nou39,txt20,txt38,txu13,txu20,txu22,txu3,txu9,wcu13
chr512	30275	CPIJ013917	A	G	AAA (TTT)	GAA (TTC)	3	125	27	43	55	22	33	8	5	19	38	8.56364e-05	-0.240708	0.284211	0.633333	0.628571	0.630952	0.632	0.0021083	-3.07454	txt21,txt24,txt29,txt31,txu40,txu8,wcu1,wcu6	txt23,txt3,txt5,wcu25,wcu4	azu19,hct46,hct50,hct54,hct66,hcu12,hcu17,hcu8,not46,nou102,nou107,nou133,txt26,txt7,txu14,txu18,txu39,txu4,wcu24	azu8,hct41,hct42,hct51,hct53,hct61,hct64,hct70,hct73,hcu13,hcu15,hcu16,hcu18,hcu2,hcu30,hcu5,hcu9,not14,not15,not43,not7,nou124,nou127,nou129,nou130,nou132,nou30,nou33,nou39,txt20,txt36,txt38,txu13,txu20,txu22,txu3,txu9,wcu13
chr9	1879652	CPIJ000926	A	T	AAC	ATC	2	117	8	58	51	21	30	2	9	6	49	4.24004e-05	-0.250474	0.274725	0.647059	0.65625	0.651654	0.649573	0.00285595	-2.98283	wcu10,wcu20	txt23,txt29,txu8,wcu11,wcu15,wcu18,wcu19,wcu5,wcu6	hct60,hct61,hcu2,not11,nou108,txu6	hct41,hct42,hct46,hct50,hct51,hct56,hct64,hct70,hct73,hcu12,hcu13,hcu15,hcu31,hcu32,not13,not19,not2,not24,not4,not43,not46,not7,nou107,nou124,nou127,nou129,nou130,nou132,nou133,nou33,nou39,nou61,txt14,txt20,txt36,txt40,txt7,txu11,txu12,txu13,txu2,txu21,txu22,txu39,txu4,txu43,txu7,wcu16,wcu24
chr9	1879649	CPIJ000926	C	T	ACG	ATG	2	117	8	58	51	21	30	2	9	6	49	4.24004e-05	-0.250474	0.274725	0.647059	0.65625	0.651654	0.649573	0.00285595	-2.98283	wcu10,wcu20	txt23,txt29,txu8,wcu11,wcu15,wcu18,wcu19,wcu5,wcu6	hct60,hct61,hcu2,not11,nou108,txu6	hct41,hct42,hct46,hct50,hct51,hct56,hct64,hct70,hct73,hcu12,hcu13,hcu15,hcu31,hcu32,not13,not19,not2,not24,not4,not43,not46,not7,nou107,nou124,nou127,nou129,nou130,nou132,nou133,nou33,nou39,nou61,txt14,txt20,txt36,txt40,txt7,txu11,txu12,txu13,txu2,txu21,txu22,txu39,txu4,txu43,txu7,wcu16,wcu24
chr9	1879653	CPIJ000926	C	T	AAC	AAT	3	117	8	58	51	21	30	2	9	6	49	4.24004e-05	-0.250474	0.274725	0.647059	0.65625	0.651654	0.649573	0.00285595	-2.98283	wcu10,wcu20	txt23,txt29,txu8,wcu11,wcu15,wcu18,wcu19,wcu5,wcu6	hct60,hct61,hcu2,not11,nou108,txu6	hct41,hct42,hct46,hct50,hct51,hct56,hct64,hct70,hct73,hcu12,hcu13,hcu15,hcu31,hcu32,not13,not19,not2,not24,not4,not43,not46,not7,nou107,nou124,nou127,nou129,nou130,nou132,nou133,nou33,nou39,nou61,txt14,txt20,txt36,txt40,txt7,txu11,txu12,txu13,txu2,txu21,txu22,txu39,txu4,txu43,txu7,wcu16,wcu24
chr39	62854	CPIJ003082	C	A	GAC	GAA	3	125	56	60	9	4	5	22	9	34	51	0.0803204	-0.217172	0.367647	0.944444	0.114286	0.529365	0.712	0.00302372	-2.96532	azu3,azu5,azu6,not40,txt19,txt21,txt23,txt3,txt31,txt39,txt5,txu40,txu8,wcu11,wcu12,wcu15,wcu18,wcu19,wcu2,wcu20,wcu4,wcu6	txt13,txt24,txt29,txt35,wcu1,wcu10,wcu17,wcu25,wcu5	hct50,hct51,hct56,hct61,hct65,hct66,hct70,hcu13,hcu16,hcu2,hcu31,not11,not15,not46,not7,not8,nou107,nou108,nou127,nou132,nou30,nou33,txt14,txt20,txt7,txu13,txu18,txu22,txu3,txu31,txu4,txu43,txu9,wcu21	hct41,hct42,hct43,hct46,hct53,hct54,hct60,hct64,hct73,hcu12,hcu17,hcu18,hcu30,hcu32,hcu43,hcu5,hcu9,not13,not14,not19,not2,not24,not4,not43,nou1,nou102,nou104,nou124,nou129,nou130,nou133,nou134,nou39,txt26,txt36,txt38,txt40,txt8,txu11,txu12,txu14,txu2,txu20,txu21,txu39,txu6,txu7,wcu13,wcu16,wcu24,wcu8
chr426	204355	CPIJ013027	A	G	CAA (TTG)	CAG (CTG)	1	120	57	16	47	20	27	10	2	47	14	8.4881e-05	-0.268229	0.252	0.693182	0.625	0.659091	0.675	0.00311956	-2.9557	azu1,azu3,azu6,txt5,txu8,wcu12,wcu14,wcu2,wcu4,wcu5	txt23,txt39	azu8,hct42,hct46,hct51,hct53,hct56,hct65,hct66,hct73,hcu13,hcu15,hcu18,hcu30,hcu31,hcu32,hcu5,hcu8,hcu9,not43,not7,not8,nou102,nou107,nou124,nou127,nou130,nou133,nou33,nou39,txt20,txt7,txu11,txu12,txu13,txu18,txu2,txu21,txu3,txu31,txu39,txu4,txu6,txu7,txu9,wcu13,wcu16,wcu8	azu19,hct41,hct60,hcu17,hcu2,not15,not2,not4,not46,txt26,txt38,txt8,txu14,wcu24
chr9	1879617	CPIJ000926	A	G	GGA	GGG	3	121	13	57	51	21	30	3	9	10	48	4.85105e-05	-0.24641	0.283019	0.659091	0.636364	0.647727	0.652893	0.00330201	-2.93813	wcu10,wcu12,wcu20	txt23,txt29,txu8,wcu11,wcu15,wcu18,wcu19,wcu4,wcu6	hct60,hct61,hcu2,hcu30,not11,not8,nou108,txt20,txu20,txu6	hct41,hct42,hct46,hct50,hct51,hct56,hct64,hct70,hct73,hcu12,hcu13,hcu15,hcu31,hcu32,not13,not19,not2,not24,not4,not43,not46,not7,nou102,nou107,nou124,nou127,nou129,nou132,nou133,nou134,nou33,nou39,nou61,txt14,txt40,txu11,txu12,txu13,txu2,txu21,txu22,txu39,txu4,txu43,txu7,wcu16,wcu24,wcu8
chr631	190377	CPIJ015248	G	A	GAG	AAG	1	125	25	8	92	34	58	0	1	25	7	2.20182e-05	-0.320785	0.0874811	0.355556	0.971429	0.663492	0.528	0.00355388	-2.91526		txt39	hct42,hct43,hct61,hct64,hct66,hct70,hct73,hcu12,hcu16,hcu43,not13,not14,not4,not8,nou104,nou134,nou30,txt14,txt36,txt40,txu13,txu3,txu43,txu6,wcu13	hct51,hcu30,not24,nou102,txu14,txu2,txu21
chr631	190216	CPIJ015248	T	A	CTG	CAG	2	118	23	10	85	31	54	0	1	23	9	1.12125e-05	-0.318194	0.0849725	0.372093	0.96875	0.670422	0.533898	0.00382621	-2.89214		txt39	hct42,hct61,hct64,hct66,hct70,hct73,hcu12,hcu16,hcu43,not13,not8,nou104,nou130,txt14,txt36,txt40,txt7,txu13,txu3,txu31,txu43,txu6,wcu13	hct51,hcu30,not24,nou102,nou134,nou30,txu14,txu2,txu21
chr39	63013	CPIJ003082	C	T	CAC	CAT	3	125	52	59	14	6	8	20	9	32	50	0.0325802	-0.205042	0.383838	0.911111	0.171429	0.54127	0.704	0.00471951	-2.82558	azu3,azu5,azu6,not40,txt19,txt21,txt23,txt3,txt31,txt39,txt5,txu40,txu8,wcu11,wcu12,wcu18,wcu19,wcu20,wcu4,wcu6	txt13,txt24,txt29,txt35,wcu1,wcu10,wcu17,wcu25,wcu5	hct50,hct51,hct56,hct66,hct70,hcu13,hcu16,hcu2,hcu31,not11,not15,not46,not7,not8,nou107,nou108,nou127,nou132,nou30,nou33,txt14,txt20,txt38,txt7,txu18,txu22,txu3,txu31,txu4,txu43,txu9,wcu21	hct41,hct42,hct43,hct46,hct53,hct54,hct60,hct64,hct73,hcu12,hcu17,hcu18,hcu30,hcu32,hcu43,hcu5,hcu9,not13,not14,not19,not2,not24,not4,not43,nou1,nou102,nou104,nou124,nou129,nou130,nou133,nou134,nou39,txt26,txt36,txt40,txt8,txu11,txu12,txu14,txu2,txu20,txu21,txu39,txu6,txu7,wcu13,wcu16,wcu24,wcu8
chr247	463514	CPIJ009473	C	T	CCG	CTG	2	51	1	45	5	3	2	1	6	0	39	0.00271575	-0.457143	0.111111	0.95122	0.3	0.62561	0.823529	0.00475125	-2.82343	wcu20	azu28,txt19,txt29,txt39,txu8,wcu4		azu19,azu8,hct42,hct50,hct51,hct54,hct60,hct64,hct73,hcu12,hcu13,hcu15,hcu16,hcu17,hcu2,hcu30,hcu32,hcu8,hcu9,not14,not15,not19,not46,nou129,nou134,nou30,nou33,txt20,txt36,txt38,txt7,txt8,txu11,txu12,txu20,txu21,txu3,txu31,txu7
chr156	130372	CPIJ006721	C	G	CCG (CGG)	GCG (CGC)	3	121	65	29	27	11	16	22	2	43	27	0.00986812	-0.196025	0.389878	0.813953	0.314286	0.56412	0.669421	0.00492176	-2.81211	azu1,azu28,azu3,azu5,azu6,not40,txt13,txt21,txt23,txt3,txt35,txt39,wcu1,wcu14,wcu15,wcu17,wcu18,wcu20,wcu25,wcu4,wcu5,wcu6	txt19,txu40	azu19,azu8,hct51,hct53,hct54,hct60,hct64,hcu12,hcu15,hcu17,hcu30,hcu31,not11,not13,not14,not2,not24,not4,not46,not8,nou1,nou104,nou124,nou127,nou129,nou133,nou33,nou39,nou61,txt26,txt7,txt8,txu11,txu12,txu18,txu20,txu31,txu4,txu43,txu6,txu7,txu9,wcu24	hct41,hct42,hct43,hct46,hct50,hct56,hct66,hct70,hcu13,hcu16,hcu2,hcu32,hcu43,hcu8,hcu9,not15,not43,not7,nou102,nou108,nou132,txt40,txu2,txu3,txu39,wcu21,wcu8
chr9	1879608	CPIJ000926	G	T	CGG	CGT	3	121	11	57	53	21	32	3	9	8	48	0.000115363	-0.228226	0.307692	0.636364	0.636364	0.636364	0.636364	0.0052275	-2.79267	wcu10,wcu12,wcu20	txt23,txt29,txu8,wcu11,wcu15,wcu18,wcu19,wcu4,wcu6	hct60,hcu2,not11,not8,nou108,txt20,txu20,txu6	hct41,hct42,hct46,hct50,hct51,hct56,hct64,hct70,hct73,hcu12,hcu13,hcu15,hcu31,hcu32,not13,not19,not2,not24,not4,not43,not46,not7,nou102,nou107,nou124,nou127,nou129,nou132,nou133,nou134,nou33,nou39,nou61,txt14,txt40,txu11,txu12,txu13,txu2,txu21,txu22,txu39,txu4,txu43,txu7,wcu16,wcu24,wcu8
chr104	252768	CPIJ005959	G	A	GTT	ATT	1	120	30	7	83	29	54	3	0	27	7	0.000134184	-0.281216	0.136249	0.386364	0.90625	0.646307	0.525	0.00565662	-2.76705	not40,txt19,txt23		hct43,hct46,hct51,hct54,hct61,hcu31,hcu43,not11,not13,not15,not46,not8,nou1,nou107,nou108,nou127,nou130,nou132,nou134,nou30,nou33,nou39,nou61,txt40,txu3,txu9,wcu24	hct50,hct65,hct70,hct73,hcu12,hcu17,txu4
chr104	252767	CPIJ005959	A	G	CAA	CAG	3	120	30	7	83	29	54	3	0	27	7	0.000134184	-0.281216	0.136249	0.386364	0.90625	0.646307	0.525	0.00565662	-2.76705	not40,txt19,txt23		hct43,hct46,hct51,hct54,hct61,hcu31,hcu43,not11,not13,not15,not46,not8,nou1,nou107,nou108,nou127,nou130,nou132,nou134,nou30,nou33,nou39,nou61,txt40,txu3,txu9,wcu24	hct50,hct65,hct70,hct73,hcu12,hcu17,txu4
chr104	252773	CPIJ005959	A	G	TTA	TTG	3	120	30	7	83	29	54	3	0	27	7	0.000134184	-0.281216	0.136249	0.386364	0.90625	0.646307	0.525	0.00565662	-2.76705	not40,txt19,txt23		hct43,hct46,hct51,hct54,hct61,hcu31,hcu43,not11,not13,not15,not46,not8,nou1,nou107,nou108,nou127,nou130,nou132,nou134,nou30,nou33,nou39,nou61,txt40,txu3,txu9,wcu24	hct50,hct65,hct70,hct73,hcu12,hcu17,txu4
chr25	1410043	CPIJ001759	T	C	TTT	TTC	3	122	46	41	35	15	20	13	6	33	35	0.000800957	-0.233259	0.323625	0.772727	0.441176	0.606952	0.680328	0.00644061	-2.72446	azu28,azu5,not40,txt13,txt31,txt35,txt39,txu40,txu8,wcu11,wcu14,wcu15,wcu25	azu3,txt19,txt3,txt5,wcu1,wcu6	azu19,hct41,hct42,hct46,hct50,hct56,hct60,hct73,hcu12,hcu13,hcu31,hcu9,not14,not2,not24,not4,not43,not46,not7,nou102,nou104,nou107,nou108,nou134,nou33,nou39,txt20,txt38,txu11,txu6,txu7,wcu21,wcu24	azu8,hct53,hct54,hct64,hct70,hcu15,hcu16,hcu18,hcu30,hcu32,hcu5,hcu8,not11,not13,not15,not19,nou1,nou127,nou129,nou130,nou30,nou61,txt36,txt7,txu12,txu14,txu21,txu22,txu3,txu39,txu4,txu43,txu9,wcu13,wcu16
chr512	34374	CPIJ013918	T	C	CAT	CAC	3	99	19	26	54	19	35	4	2	15	24	0.000394147	-0.239176	0.233918	0.527027	0.76	0.643514	0.585859	0.0074005	-2.67826	txt23,txt5,wcu25,wcu4	txt3,wcu6	azu8,hct41,hct42,hct46,hct53,hct73,hcu16,hcu5,hcu9,nou39,txt20,txt38,txu3,txu4,wcu13	hct51,hct64,hcu13,hcu15,hcu17,hcu18,hcu30,not14,not15,not43,not7,nou107,nou124,nou127,nou129,nou130,nou132,nou133,nou30,txt36,txu13,txu20,txu22,txu9
chr53	106842	CPIJ003623	A	G	AGA	GGA	1	101	13	83	5	3	2	7	19	6	64	0.0251624	-0.348603	0.223881	0.972222	0.103448	0.537835	0.722772	0.00758971	-2.6698	txt21,txt29,txt39,txu8,wcu1,wcu17,wcu5	azu28,azu3,azu5,azu6,not40,txt19,txt23,txt3,txt35,txt5,txu40,wcu10,wcu11,wcu14,wcu15,wcu19,wcu2,wcu20,wcu6	azu19,hct61,not2,nou108,txt14,wcu8	azu8,hct41,hct42,hct43,hct50,hct51,hct53,hct54,hct56,hct60,hct64,hct66,hct70,hct73,hcu12,hcu13,hcu15,hcu16,hcu18,hcu2,hcu30,hcu31,hcu32,hcu43,hcu5,hcu8,not11,not13,not19,not4,not43,not7,nou104,nou107,nou124,nou127,nou129,nou130,nou132,nou133,nou61,txt20,txt26,txt36,txt38,txt7,txt8,txu11,txu13,txu14,txu18,txu2,txu21,txu22,txu3,txu31,txu39,txu4,txu43,txu6,txu7,txu9,wcu16,wcu24
chr426	204374	CPIJ013027	G	C	GAG (CTC)	CAG (CTG)	3	121	52	15	54	21	33	9	2	43	13	0.000631594	-0.230352	0.296066	0.629213	0.65625	0.642732	0.636364	0.0090326	-2.61082	azu1,azu3,azu6,txt5,txu8,wcu12,wcu14,wcu4,wcu5	txt23,txt39	azu8,hct42,hct51,hct53,hct56,hct65,hct66,hct73,hcu13,hcu18,hcu30,hcu31,hcu32,hcu5,hcu8,hcu9,not15,not7,not8,nou107,nou124,nou127,nou130,nou133,nou39,txt20,txt7,txu11,txu12,txu13,txu18,txu2,txu21,txu3,txu31,txu39,txu4,txu6,txu7,txu9,wcu13,wcu16,wcu8	azu19,hct41,hct60,hcu17,hcu2,not2,not4,not46,nou33,txt26,txt38,txt8,wcu24
chr104	253131	CPIJ005959	C	A	CCA	ACA	1	119	30	7	82	27	55	3	0	27	7	0.000263528	-0.261086	0.149051	0.382022	0.9	0.641011	0.512605	0.00951063	-2.59313	not40,txt19,txt23		hct43,hct46,hct51,hct54,hct61,hcu31,hcu43,not11,not13,not15,not46,not8,nou1,nou107,nou108,nou127,nou130,nou132,nou134,nou30,nou33,nou39,nou61,txt40,txu3,txu9,wcu24	hct50,hct65,hct70,hct73,hcu12,hcu17,txu4
chr281	98695	CPIJ010805	C	T	CTC (GAG)	TTC (GAA)	3	120	42	43	35	16	19	9	8	33	35	0.000147952	-0.26183	0.288228	0.781609	0.484848	0.633229	0.7	0.00974972	-2.58458	azu6,sebq,txt29,txt3,txu40,txu8,wcu19,wcu20,wcu4	not40,txt21,txt35,wcu14,wcu17,wcu18,wcu2,wcu5	azu19,hct41,hct42,hct50,hct51,hct53,hct61,hct65,hcu18,hcu2,not11,not13,not15,not4,not7,not8,nou104,nou107,nou108,nou124,nou130,nou132,txt14,txt38,txu11,txu13,txu2,txu3,txu31,txu39,txu6,txu9,wcu13	hct43,hct46,hct54,hct64,hct66,hct70,hct73,hcu12,hcu15,hcu17,hcu31,hcu32,hcu43,hcu5,hcu8,hcu9,not19,not2,not24,not46,nou127,nou129,nou133,nou30,nou33,nou39,txt20,txt40,txu14,txu20,txu21,txu22,wcu21,wcu24,wcu8
chr104	241145	CPIJ005953	A	T	CAA	CAT	3	115	24	7	84	28	56	2	0	22	7	0.000235515	-0.280702	0.111111	0.341176	0.933333	0.637255	0.495652	0.0103786	-2.56295	not40,txt19		hct50,hct61,hct73,hcu17,hcu31,hcu32,not11,not13,not15,not46,not8,nou107,nou108,nou127,nou130,nou132,nou134,nou30,nou33,nou39,txu3,wcu24	hct43,hct46,hct54,hct65,hct70,hcu12,hcu43
chr631	190002	CPIJ015248	T	C	CAT	CAC	3	115	32	79	4	2	2	13	15	19	64	0.0927005	-0.273684	0.292517	0.976471	0.0666667	0.521569	0.73913	0.0107821	-2.54968	azu1,azu28,azu3,azu5,azu6,txt19,txt21,txt24,txt29,txt35,txu40,txu8,wcu15	sebq,txt13,txt23,txt31,txt39,txt5,wcu11,wcu17,wcu18,wcu19,wcu20,wcu25,wcu4,wcu5,wcu6	azu8,hct53,hct54,hct66,hcu9,not19,not2,not4,not46,nou107,nou129,nou132,nou30,nou39,nou61,txt40,txt7,txu22,txu3	hct41,hct42,hct46,hct50,hct51,hct56,hct60,hct64,hct65,hct70,hct73,hcu12,hcu13,hcu15,hcu16,hcu17,hcu18,hcu2,hcu30,hcu31,hcu32,hcu43,hcu5,hcu8,not11,not13,not14,not15,not24,not43,not7,nou1,nou102,nou104,nou108,nou124,nou127,nou130,nou133,nou134,nou33,txt14,txt20,txt26,txt36,txt38,txu11,txu12,txu13,txu14,txu18,txu2,txu20,txu21,txu31,txu39,txu4,txu43,txu6,txu7,txu9,wcu21,wcu24,wcu8
chr631	190017	CPIJ015248	G	C	TTG	TTC	3	115	32	79	4	2	2	13	15	19	64	0.0927005	-0.273684	0.292517	0.976471	0.0666667	0.521569	0.73913	0.0107821	-2.54968	azu1,azu28,azu3,azu5,azu6,txt19,txt21,txt24,txt29,txt35,txu40,txu8,wcu15	sebq,txt13,txt23,txt31,txt39,txt5,wcu11,wcu17,wcu18,wcu19,wcu20,wcu25,wcu4,wcu5,wcu6	azu8,hct53,hct54,hct66,hcu9,not19,not2,not4,not46,nou107,nou129,nou132,nou30,nou39,nou61,txt40,txt7,txu22,txu3	hct41,hct42,hct46,hct50,hct51,hct56,hct60,hct64,hct65,hct70,hct73,hcu12,hcu13,hcu15,hcu16,hcu17,hcu18,hcu2,hcu30,hcu31,hcu32,hcu43,hcu5,hcu8,not11,not13,not14,not15,not24,not43,not7,nou1,nou102,nou104,nou108,nou124,nou127,nou130,nou133,nou134,nou33,txt14,txt20,txt26,txt36,txt38,txu11,txu12,txu13,txu14,txu18,txu2,txu20,txu21,txu31,txu39,txu4,txu43,txu6,txu7,txu9,wcu21,wcu24,wcu8
chr247	463431	CPIJ009473	T	G	ACT	ACG	3	40	4	19	17	7	10	1	1	3	18	0.000617123	-0.340336	0.10989	0.677419	0.777778	0.727599	0.7	0.0109122	-2.5455	wcu4	txt19	hcu17,nou30,txu21	azu19,azu8,hct54,hct60,hct73,hcu12,hcu16,hcu30,hcu9,not15,not46,nou33,txt36,txt8,txu12,txu20,txu3,txu31
chr792	5966	CPIJ016681	C	T	ATC (GAT)	ATT (AAT)	1	124	24	5	95	33	62	2	0	22	5	0.000415178	-0.288545	0.117424	0.303371	0.942857	0.623114	0.483871	0.0110928	-2.53976	txt39,wcu25		hct51,hcu15,not11,not13,not15,not19,not2,not24,not4,not7,not8,nou1,nou127,nou130,nou30,txt14,txt20,txu12,txu14,txu18,txu2,txu4	hcu9,nou108,nou133,nou61,txu6
chr792	5960	CPIJ016681	T	C	CTT (AAG)	CTC (GAG)	1	124	24	5	95	33	62	2	0	22	5	0.000415178	-0.288545	0.117424	0.303371	0.942857	0.623114	0.483871	0.0110928	-2.53976	txt39,wcu25		hct51,hcu15,not11,not13,not15,not19,not2,not24,not4,not7,not8,nou1,nou127,nou130,nou30,txt14,txt20,txu12,txu14,txu18,txu2,txu4	hcu9,nou108,nou133,nou61,txu6
chr104	252887	CPIJ005959	C	T	AAC	AAT	3	122	28	6	88	30	58	3	0	25	6	0.000448465	-0.265909	0.156757	0.348315	0.909091	0.628703	0.5	0.0115082	-2.52688	not40,txt19,txt23		hct43,hct46,hct51,hct54,hct61,hcu17,hcu31,hcu43,not11,not13,not15,not46,not8,nou1,nou107,nou108,nou127,nou130,nou132,nou134,nou39,nou61,txt40,txu3,wcu24	hct50,hct65,hct70,hct73,hcu12,txu4
chr39	62758	CPIJ003082	C	T	AAC	AAT	3	125	67	37	21	10	11	19	6	48	31	0.00173562	-0.256332	0.31	0.877778	0.285714	0.581746	0.712	0.0119109	-2.51477	azu5,azu6,not40,txt21,txt23,txt24,txt3,txt31,txt35,txt39,txt5,txu40,txu8,wcu11,wcu12,wcu18,wcu2,wcu4,wcu6	txt29,wcu1,wcu10,wcu17,wcu25,wcu5	hct41,hct46,hct50,hct51,hct53,hct60,hct65,hct66,hct70,hct73,hcu12,hcu16,hcu2,not11,not13,not15,not24,not46,not7,not8,nou1,nou102,nou104,nou107,nou108,nou127,nou129,nou132,nou30,nou33,nou39,txt20,txt26,txt38,txt7,txt8,txu13,txu18,txu22,txu3,txu31,txu4,txu43,txu6,txu9,wcu13,wcu16,wcu21	hct42,hct43,hct54,hct64,hcu17,hcu18,hcu30,hcu43,hcu5,hcu9,not14,not19,not2,not4,not43,nou124,nou130,nou133,nou134,txt36,txt40,txu11,txu12,txu14,txu2,txu20,txu21,txu39,txu7,wcu24,wcu8
chr104	253172	CPIJ005959	T	C	AGT	AGC	3	119	29	7	83	27	56	3	0	26	7	0.00044812	-0.255534	0.155556	0.370787	0.9	0.635393	0.504202	0.0120015	-2.5121	not40,txt19,txt23		hct43,hct46,hct51,hct54,hct61,hcu31,hcu43,not11,not13,not15,not46,not8,nou1,nou107,nou108,nou130,nou132,nou134,nou30,nou33,nou39,nou61,txt40,txu3,txu9,wcu24	hct50,hct65,hct70,hct73,hcu12,hcu17,txu4
chr792	5789	CPIJ016681	T	G	GAT (ATC)	GAG (CTC)	1	123	22	6	95	33	62	2	0	20	6	0.000415178	-0.288545	0.117424	0.295455	0.942857	0.619156	0.479675	0.0123562	-2.5018	txt39,wcu25		hct51,hcu15,not11,not13,not15,not2,not24,not4,not7,not8,nou1,nou127,nou130,nou30,txt14,txu12,txu14,txu18,txu2,txu4	hcu9,not19,nou108,nou133,nou61,txu6
chr631	190044	CPIJ015248	C	T	TTC	TTT	3	117	19	9	89	31	58	0	1	19	8	0.000134854	-0.294261	0.106912	0.317647	0.96875	0.643199	0.495726	0.0127254	-2.49136		txt39	hct42,hct64,hct66,hct73,hcu12,hcu16,hcu43,not13,not14,nou104,nou130,nou134,nou30,txt14,txt20,txt40,txu13,txu3,txu43	hct51,hct70,hcu30,not24,nou102,txu14,txu2,txu21
chr631	190065	CPIJ015248	C	T	CGC	CGT	3	117	19	9	89	31	58	0	1	19	8	0.000134854	-0.294261	0.106912	0.317647	0.96875	0.643199	0.495726	0.0127254	-2.49136		txt39	hct42,hct64,hct66,hct73,hcu12,hcu16,hcu43,not13,not14,nou104,nou130,nou134,nou30,txt14,txt20,txt40,txu13,txu3,txu43	hct51,hct70,hcu30,not24,nou102,txu14,txu2,txu21
chr39	62248	CPIJ003082	A	G	AAA	AAG	3	125	64	30	31	13	18	18	4	46	26	0.00335639	-0.209677	0.367347	0.8	0.371429	0.585714	0.68	0.0132567	-2.4768	azu6,not40,txt19,txt21,txt3,txt31,txt5,txu8,wcu10,wcu11,wcu12,wcu17,wcu18,wcu19,wcu2,wcu20,wcu5,wcu6	txt13,txt24,txt35,wcu25	hct42,hct43,hct50,hct56,hct60,hct61,hct65,hcu13,hcu16,hcu17,hcu18,hcu31,hcu43,hcu5,hcu9,not11,not15,not19,not46,not8,nou108,nou127,nou132,nou30,nou33,nou39,nou61,txt14,txt38,txt40,txt7,txu11,txu13,txu14,txu2,txu20,txu21,txu22,txu3,txu39,txu43,txu7,txu9,wcu16,wcu21,wcu8	hct41,hct46,hct53,hct54,hct73,hcu12,hcu30,hcu32,not13,not14,not2,not24,not4,not43,nou1,nou124,nou129,nou130,nou133,nou134,txt26,txt36,txt8,txu12,txu6,wcu13
chr1199	10734	CPIJ018377	T	C	CGT	CGC	3	125	68	20	37	16	21	16	3	52	17	0.00155476	-0.228729	0.335756	0.766667	0.457143	0.611905	0.68	0.0134481	-2.47168	azu28,txt19,txt21,txt23,txt24,txt3,txt31,txt35,txt39,txt5,wcu1,wcu10,wcu11,wcu14,wcu20,wcu25	azu5,txt13,wcu15	hct41,hct43,hct50,hct51,hct54,hct56,hct60,hct61,hcu12,hcu15,hcu17,hcu2,hcu30,hcu31,hcu32,hcu43,hcu5,hcu9,not14,not15,not2,not43,not46,nou102,nou104,nou108,nou124,nou127,nou130,nou133,nou30,nou33,nou39,txt14,txt20,txt26,txt38,txt40,txt8,txu12,txu14,txu18,txu2,txu20,txu22,txu4,txu43,txu9,wcu13,wcu21,wcu24,wcu8	azu8,hct46,hct64,hct65,hcu18,not24,not7,nou107,nou129,nou132,nou61,txt36,txu11,txu39,txu6,txu7,wcu16
chr104	246243	CPIJ005956	G	A	GAC	AAC	1	122	29	6	87	31	56	4	0	25	6	0.00112543	-0.258761	0.195292	0.356322	0.885714	0.621018	0.508197	0.013562	-2.46866	not40,txt19,txt23,wcu14		hct50,hct51,hct70,hct73,hcu17,hcu31,hcu32,not13,not15,not46,not8,nou1,nou107,nou108,nou127,nou130,nou132,nou134,nou30,nou33,nou39,nou61,txt40,txu4,wcu24	hct43,hct46,hct54,hcu12,hcu43,txu3
chr512	35005	CPIJ013918	T	A	CTT	CTA	3	106	14	49	43	18	25	4	9	10	40	0.000889183	-0.222176	0.339506	0.666667	0.580645	0.623656	0.641509	0.0139796	-2.45779	txt13,txt5,wcu25,wcu4	azu1,azu28,azu3,azu5,azu6,txt23,txt3,txu8,wcu6	azu19,hct46,hct66,hcu2,hcu8,nou102,nou104,txt14,txu13,txu4	azu8,hct41,hct42,hct43,hct51,hct53,hct61,hct64,hct70,hct73,hcu13,hcu15,hcu16,hcu17,hcu18,hcu30,hcu5,hcu9,not14,not15,not43,not46,not7,nou107,nou124,nou127,nou129,nou130,nou132,nou133,nou30,nou39,txt20,txt36,txt38,txu20,txu22,txu3,txu9,wcu13
chr104	242747	CPIJ005954	G	A	GTC	ATC	1	114	25	4	85	29	56	2	0	23	4	0.000682212	-0.28057	0.124583	0.325301	0.935484	0.630393	0.491228	0.0144784	-2.44517	not40,txt19		hct43,hct50,hct51,hct54,hct73,hcu17,hcu32,hcu43,not11,not13,not15,nou1,nou107,nou108,nou130,nou132,nou30,nou33,nou39,nou61,txu4,txu9,wcu24	hct70,hcu12,txu12,txu3
chr281	97920	CPIJ010805	T	A	TCC (GGA)	ACC (GGT)	3	125	37	7	81	30	51	3	2	34	5	0.00168519	-0.233115	0.270455	0.433333	0.857143	0.645238	0.552	0.0151306	-2.42924	not40,txt3,wcu18	wcu17,wcu5	azu19,hct51,hct53,hct54,hct61,hct66,hct73,hcu12,hcu15,hcu17,hcu2,hcu5,hcu8,not15,not24,not7,not8,nou107,nou124,nou127,nou129,nou130,nou133,nou134,nou30,nou33,nou39,txt20,txt38,txt40,txu22,txu3,txu9,wcu21	hct46,hct64,hcu31,nou132,wcu8
chr426	204916	CPIJ013027	G	A	CAG (CTG)	CAA (TTG)	1	123	37	10	76	26	50	7	0	30	10	0.00170571	-0.219298	0.269231	0.444444	0.787879	0.616162	0.536585	0.0153989	-2.42286	azu28,azu3,azu6,txt39,txt5,txu8,wcu4		hct42,hct51,hct53,hct56,hct66,hcu13,hcu18,hcu30,hcu32,hcu9,not11,not15,not4,not8,nou124,nou127,nou33,txt38,txt7,txu11,txu13,txu3,txu31,txu39,txu4,txu6,txu7,txu9,wcu13,wcu16	hct60,hcu2,not14,not2,not46,nou130,txt26,txt8,txu2,wcu24
chr426	205358	CPIJ013027	A	C	AAG (CTT)	CAG (CTG)	3	125	42	5	78	28	50	7	0	35	5	0.00274326	-0.224359	0.277778	0.444444	0.8	0.622222	0.544	0.0161001	-2.40664	azu6,txt23,txt24,txt39,txu8,wcu12,wcu4		azu8,hct41,hct53,hct56,hcu13,hcu17,hcu18,hcu32,hcu5,hcu9,not15,not2,not46,not7,not8,nou127,nou133,nou30,nou33,nou39,txt38,txt7,txu11,txu18,txu2,txu21,txu3,txu31,txu39,txu4,txu6,txu7,wcu13,wcu16,wcu24	hct60,hcu2,hcu30,txt26,txt8
chr2	1633945	CPIJ000304	A	T	CAC	CTC	2	95	11	69	15	7	8	4	13	7	56	0.00435877	-0.265324	0.288115	0.887324	0.291667	0.589495	0.736842	0.0165671	-2.39618	azu6,not40,txt13,wcu17	azu3,txt19,txt24,txt29,txt3,txt31,txt35,txt39,txt5,txu40,txu8,wcu18,wcu20	hct66,hcu12,hcu13,hcu17,not2,nou130,nou30	azu19,azu8,hct41,hct42,hct43,hct50,hct51,hct60,hct73,hcu15,hcu16,hcu18,hcu2,hcu30,hcu31,hcu43,hcu5,hcu8,not11,not13,not15,not24,not4,not43,not46,not7,not8,nou102,nou104,nou124,nou129,nou133,nou33,nou39,nou61,txt14,txt20,txt26,txt36,txt40,txt7,txt8,txu12,txu14,txu18,txu2,txu20,txu21,txu31,txu39,txu4,txu43,txu6,txu9,wcu13,wcu24
chr2	1633967	CPIJ000304	C	G	AGC	AGG	3	95	11	69	15	7	8	4	13	7	56	0.00435877	-0.265324	0.288115	0.887324	0.291667	0.589495	0.736842	0.0165671	-2.39618	azu6,not40,txt13,wcu17	azu3,txt19,txt24,txt29,txt3,txt31,txt35,txt39,txt5,txu40,txu8,wcu18,wcu20	hct66,hcu12,hcu13,hcu17,not2,nou130,nou30	azu19,azu8,hct41,hct42,hct43,hct50,hct51,hct60,hct73,hcu15,hcu16,hcu18,hcu2,hcu30,hcu31,hcu43,hcu5,hcu8,not11,not13,not15,not24,not4,not43,not46,not7,not8,nou102,nou104,nou124,nou129,nou133,nou33,nou39,nou61,txt14,txt20,txt26,txt36,txt40,txt7,txt8,txu12,txu14,txu18,txu2,txu20,txu21,txu31,txu39,txu4,txu43,txu6,txu9,wcu13,wcu24
chr86	262319	CPIJ005332	C	T	CGC (GCG)	TGC (GCA)	3	125	31	2	92	32	60	2	1	29	1	0.00517739	-0.23354	0.241935	0.333333	0.914286	0.62381	0.496	0.0172689	-2.38093	txu8,wcu4	not40	hct41,hct42,hct50,hct53,hct56,hct60,hcu13,hcu16,hcu17,hcu18,hcu31,not11,not13,not14,not2,not4,not43,not7,nou102,nou104,nou108,nou124,nou30,nou61,txt14,txu31,txu9,wcu13,wcu8	txu12
chr39	63019	CPIJ003082	C	G	GAC	GAG	3	125	63	37	25	11	14	18	6	45	31	0.0051894	-0.221022	0.356839	0.844444	0.314286	0.579365	0.696	0.0174374	-2.37735	azu5,azu6,not40,txt21,txt23,txt24,txt3,txt31,txt35,txt39,txt5,txu40,txu8,wcu11,wcu12,wcu18,wcu4,wcu6	txt29,wcu1,wcu10,wcu17,wcu25,wcu5	hct41,hct46,hct50,hct51,hct53,hct60,hct66,hct70,hct73,hcu12,hcu16,hcu2,not11,not13,not15,not24,not46,not7,not8,nou1,nou102,nou104,nou107,nou108,nou127,nou132,nou134,nou30,nou33,nou39,txt20,txt26,txt38,txt7,txt8,txu18,txu22,txu3,txu31,txu4,txu43,txu6,txu9,wcu16,wcu21	hct42,hct43,hct54,hct64,hcu17,hcu18,hcu30,hcu43,hcu5,hcu9,not14,not19,not2,not4,not43,nou124,nou129,nou130,nou133,txt36,txt40,txu11,txu12,txu14,txu2,txu20,txu21,txu39,txu7,wcu24,wcu8
chr1224	30170	CPIJ018624	G	A	GGT (ACC)	AGT (ACT)	3	122	20	66	36	14	22	8	12	12	54	0.0061224	-0.178363	0.419048	0.75	0.411765	0.580882	0.655738	0.0179904	-2.36582	azu6,txt13,txt19,txt29,txt35,txu40,txu8,wcu19	azu3,azu5,not40,sebq,txt23,txt24,txt5,wcu15,wcu17,wcu2,wcu5,wcu6	hct41,hct50,hcu31,hcu9,not11,not8,nou124,nou127,txt14,txt36,txt7,txu39	azu19,azu8,hct42,hct46,hct51,hct54,hct60,hct61,hct64,hct65,hct66,hct70,hct73,hcu15,hcu16,hcu17,hcu18,hcu2,hcu30,hcu5,hcu8,not13,not15,not19,not2,not24,not4,not43,not46,not7,nou102,nou104,nou107,nou108,nou130,nou132,nou133,nou30,nou39,nou61,txt26,txt38,txt40,txu12,txu13,txu2,txu20,txu22,txu3,txu4,txu43,txu9,wcu13,wcu16
chr448	112949	CPIJ013319	A	G	GTA	GTG	3	121	55	51	15	7	8	17	9	38	42	0.0111428	-0.243737	0.327869	0.909091	0.212121	0.560606	0.719008	0.0187182	-2.3511	azu1,azu28,azu6,not40,txt19,txt21,txt23,txt29,txt3,txt35,txt5,txu40,wcu17,wcu18,wcu2,wcu20,wcu5	azu3,azu5,txt13,txt39,txu8,wcu14,wcu15,wcu25,wcu4	azu19,hct41,hct43,hct51,hct53,hct60,hct64,hct66,hct73,hcu13,hcu17,hcu18,hcu2,hcu43,hcu8,not11,not13,not8,nou102,nou108,nou124,nou127,nou129,nou130,nou132,nou133,nou61,txt20,txt36,txt40,txt7,txu12,txu21,txu22,txu31,txu6,txu9,wcu8	azu8,hct42,hct46,hct54,hct61,hct65,hcu12,hcu15,hcu16,hcu30,hcu31,hcu32,hcu5,not15,not19,not2,not24,not4,not43,not46,not7,nou107,nou134,nou30,nou33,nou39,txt14,txt26,txt38,txt8,txu11,txu13,txu14,txu18,txu2,txu20,txu3,txu39,txu4,txu43,txu7,wcu24
chr25	1410055	CPIJ001759	T	G	CCT	CCG	3	124	49	43	32	13	19	14	7	35	36	0.0059124	-0.198843	0.382459	0.788889	0.382353	0.585621	0.677419	0.019306	-2.33957	azu28,not40,txt29,txt31,txt35,txt39,txu40,wcu10,wcu11,wcu12,wcu14,wcu15,wcu19,wcu25	azu3,txt13,txt19,txt3,txt5,wcu1,wcu6	azu19,hct41,hct42,hct46,hct50,hct56,hct60,hcu12,hcu13,hcu31,hcu9,not14,not2,not24,not4,not43,not46,not7,nou102,nou104,nou107,nou108,nou133,nou134,nou33,nou39,txt20,txt38,txu11,txu18,txu6,txu7,wcu16,wcu21,wcu24	azu8,hct53,hct54,hct64,hct65,hct70,hcu15,hcu16,hcu18,hcu30,hcu32,hcu5,hcu8,not11,not13,not15,not19,nou1,nou127,nou129,nou130,nou30,nou61,txt36,txt7,txu12,txu13,txu14,txu21,txu22,txu3,txu39,txu4,txu43,txu9,wcu13
chr104	252539	CPIJ005959	G	A	CTG	CTA	3	120	26	8	86	29	57	4	0	22	8	0.0012464	-0.241971	0.206897	0.344828	0.878788	0.611808	0.491667	0.0206415	-2.31448	not40,txt19,txt23,txt31		hct46,hct51,hct54,hcu31,hcu43,not13,not15,not46,nou1,nou107,nou108,nou127,nou130,nou132,nou30,nou33,nou39,nou61,txt40,txu3,txu9,wcu24	hct43,hct50,hct65,hct70,hct73,hcu12,hcu17,txu4
chr106	545923	CPIJ006068	C	T	CTG	TTG	1	120	53	36	31	11	20	17	4	36	32	0.0309696	-0.154839	0.454545	0.772727	0.34375	0.558239	0.658333	0.0216658	-2.29618	azu1,azu28,azu3,azu6,not40,txt19,txt21,txt29,txt35,txt5,txu40,wcu11,wcu17,wcu18,wcu4,wcu5,wcu6	txt23,wcu14,wcu2,wcu25	azu19,azu8,hct51,hct60,hct61,hcu15,hcu16,hcu18,hcu31,hcu32,hcu5,not11,not13,not46,not7,not8,nou107,nou108,nou124,nou130,nou132,nou33,nou39,nou61,txt20,txt38,txt40,txt8,txu12,txu2,txu21,txu39,txu6,txu9,wcu16,wcu8	hct42,hct43,hct46,hct53,hct54,hct56,hct65,hct66,hct73,hcu12,hcu13,hcu17,hcu2,hcu30,hcu43,hcu8,not15,nou133,txt14,txt36,txt7,txu11,txu13,txu18,txu20,txu3,txu31,txu43,txu7,wcu13,wcu21,wcu24
chr512	34847	CPIJ013918	T	C	TAT	TAC	3	110	32	60	18	7	11	14	11	18	49	0.0916336	-0.152047	0.487685	0.858974	0.21875	0.538862	0.672727	0.0221257	-2.2882	txt19,txt23,txt29,txt35,txt5,txu40,txu8,wcu1,wcu10,wcu14,wcu15,wcu17,wcu4,wcu5	azu1,azu28,azu3,azu5,azu6,txt3,txt39,wcu12,wcu19,wcu25,wcu6	hct41,hct46,hct50,hct56,hct61,hct70,hcu8,nou1,txt14,txt26,txt8,txu11,txu12,txu31,txu39,txu4,txu43,txu7	azu19,azu8,hct42,hct51,hct53,hct64,hct73,hcu13,hcu15,hcu16,hcu17,hcu18,hcu2,hcu30,hcu32,hcu5,hcu9,not11,not14,not15,not24,not43,not7,nou104,nou107,nou108,nou124,nou127,nou129,nou130,nou132,nou133,nou30,nou33,nou39,nou61,txt20,txt36,txt38,txt40,txu13,txu14,txu2,txu20,txu22,txu3,txu9,wcu13,wcu16
chr36	434186	CPIJ002681	C	A	CTC	ATC	1	121	35	81	5	3	2	13	18	22	63	0.0235294	-0.351269	0.220721	0.977011	0.0882353	0.532623	0.727273	0.0228287	-2.27629	azu28,azu5,azu6,not40,txt21,txt3,txt35,wcu1,wcu11,wcu15,wcu18,wcu20,wcu25	azu3,txt13,txt19,txt23,txt24,txt39,txt5,txu40,txu8,wcu10,wcu12,wcu14,wcu17,wcu19,wcu2,wcu4,wcu5,wcu6	hct51,hcu12,hcu16,hcu30,hcu9,not8,nou107,nou127,nou129,nou130,txt20,txu12,txu13,txu2,txu22,txu31,txu39,txu43,txu6,wcu16,wcu24,wcu8	azu19,azu8,hct41,hct42,hct46,hct50,hct53,hct54,hct56,hct60,hct61,hct65,hct66,hct70,hct73,hcu13,hcu15,hcu17,hcu18,hcu2,hcu31,hcu32,hcu43,hcu5,hcu8,not11,not13,not15,not19,not2,not24,not4,not43,not46,not7,nou1,nou102,nou108,nou124,nou132,nou133,nou134,nou30,nou39,nou61,txt14,txt26,txt36,txt38,txt40,txt7,txt8,txu11,txu14,txu18,txu20,txu21,txu3,txu4,txu7,txu9,wcu13,wcu21
chr792	5148	CPIJ016681	C	A	CTT (AAG)	ATT (AAT)	3	117	20	7	90	29	61	2	0	18	7	0.0013734	-0.263399	0.131466	0.290698	0.935484	0.613091	0.461538	0.0234647	-2.26578	txt39,wcu25		hct51,hcu15,not13,not15,not19,not2,not24,not4,not7,nou1,nou127,nou130,nou30,txt14,txu14,txu18,txu2,txu4	hct61,hcu9,not11,nou108,nou133,nou61,txu6
chr281	98370	CPIJ010805	A	G	AAT (ATT)	GAT (ATC)	3	124	32	7	85	30	55	2	2	30	5	0.00359337	-0.222506	0.275	0.388889	0.882353	0.635621	0.524194	0.0242508	-2.25313	not40,txt3	wcu17,wcu5	azu19,hct46,hct53,hct66,hct73,hcu12,hcu15,hcu18,hcu5,hcu8,not14,not15,not24,not8,nou107,nou124,nou127,nou130,nou132,nou133,nou134,nou30,nou39,txt20,txt38,txu22,txu3,txu9,wcu21,wcu8	hct64,hcu31,not7,nou104,nou129
chr36	92402	CPIJ002663	C	T,A	CAC	CAT,CAA	3	125	41	8	76	27	49	7	1	34	7	0.00644282	-0.197368	0.340278	0.455556	0.771429	0.613492	0.544	0.0243336	-2.25182	txt21,txt35,wcu10,wcu12,wcu17,wcu2,wcu5	txt3	hct43,hct54,hct56,hct64,hct65,hct66,hct70,hcu13,hcu43,not11,not13,not19,not24,nou102,nou104,nou108,nou124,nou129,nou132,nou133,nou134,txt14,txt36,txt38,txu11,txu13,txu18,txu31,txu39,txu7,wcu13,wcu16,wcu24,wcu8	hct46,hct50,hct51,hcu15,hcu31,hcu9,wcu21
chr25	1409938	CPIJ001759	C	T	AAC	AAT	3	125	49	34	42	16	26	14	5	35	29	0.00697264	-0.175824	0.419355	0.711111	0.457143	0.584127	0.64	0.0253167	-2.23654	azu5,not40,txt19,txt29,txt39,txu40,wcu10,wcu11,wcu12,wcu14,wcu15,wcu18,wcu19,wcu25	azu3,txt3,txt5,wcu1,wcu6	azu19,hct41,hct42,hct46,hct50,hct51,hct56,hct60,hct61,hct73,hcu12,hcu13,hcu30,not14,not19,not2,not24,not43,not46,not7,nou102,nou104,nou108,nou133,nou134,nou33,nou39,txt38,txt7,txu11,txu18,txu20,txu7,wcu21,wcu24	azu8,hct53,hct54,hct64,hct65,hct70,hcu15,hcu16,hcu18,hcu32,hcu8,not11,not13,not15,not4,nou1,nou127,nou129,nou130,nou30,nou61,txu12,txu13,txu21,txu22,txu3,txu43,txu9,wcu13
chr25	1409941	CPIJ001759	C	T	GCC	GCT	3	125	49	34	42	16	26	14	5	35	29	0.00697264	-0.175824	0.419355	0.711111	0.457143	0.584127	0.64	0.0253167	-2.23654	azu5,not40,txt19,txt29,txt39,txu40,wcu10,wcu11,wcu12,wcu14,wcu15,wcu18,wcu19,wcu25	azu3,txt3,txt5,wcu1,wcu6	azu19,hct41,hct42,hct46,hct50,hct51,hct56,hct60,hct61,hct73,hcu12,hcu13,hcu30,not14,not19,not2,not24,not43,not46,not7,nou102,nou104,nou108,nou133,nou134,nou33,nou39,txt38,txt7,txu11,txu18,txu20,txu7,wcu21,wcu24	azu8,hct53,hct54,hct64,hct65,hct70,hcu15,hcu16,hcu18,hcu32,hcu8,not11,not13,not15,not4,nou1,nou127,nou129,nou130,nou30,nou61,txu12,txu13,txu21,txu22,txu3,txu43,txu9,wcu13
chr25	1409971	CPIJ001759	T	C	ATT	ATC	3	125	49	34	42	16	26	14	5	35	29	0.00697264	-0.175824	0.419355	0.711111	0.457143	0.584127	0.64	0.0253167	-2.23654	azu5,not40,txt19,txt29,txt39,txu40,wcu10,wcu11,wcu12,wcu14,wcu15,wcu18,wcu19,wcu25	azu3,txt3,txt5,wcu1,wcu6	azu19,hct41,hct42,hct46,hct50,hct51,hct56,hct60,hct61,hct73,hcu12,hcu13,hcu30,not14,not19,not2,not24,not43,not46,not7,nou102,nou104,nou108,nou133,nou134,nou33,nou39,txt38,txt7,txu11,txu18,txu20,txu7,wcu21,wcu24	azu8,hct53,hct54,hct64,hct65,hct70,hcu15,hcu16,hcu18,hcu32,hcu8,not11,not13,not15,not4,nou1,nou127,nou129,nou130,nou30,nou61,txu12,txu13,txu21,txu22,txu3,txu43,txu9,wcu13
chr106	545643	CPIJ006068	T	C	CGT	CGC	3	125	59	26	40	14	26	19	2	40	24	0.0319256	-0.142793	0.48539	0.711111	0.4	0.555556	0.624	0.0255549	-2.23291	azu1,azu28,azu3,azu6,not40,txt19,txt21,txt23,txt29,txt35,txu40,wcu11,wcu14,wcu17,wcu18,wcu25,wcu4,wcu5,wcu6	wcu1,wcu2	azu19,azu8,hct51,hct53,hct61,hcu12,hcu15,hcu16,hcu18,hcu2,hcu31,hcu32,hcu5,not11,not13,not15,not24,not46,not7,nou104,nou107,nou108,nou124,nou33,nou39,nou61,txt20,txt38,txt40,txt8,txu12,txu2,txu21,txu3,txu39,txu6,txu9,wcu21,wcu24,wcu8	hct42,hct43,hct46,hct54,hct56,hct65,hct66,hct73,hcu13,hcu17,hcu30,hcu43,hcu8,nou133,txt14,txt36,txu11,txu13,txu18,txu20,txu31,txu43,txu7,wcu13
chr140	184936	CPIJ007135	C	A	CTC (GAG)	ATC (GAT)	3	121	27	12	82	29	53	3	2	24	10	0.00291788	-0.216404	0.290752	0.390805	0.852941	0.621873	0.520661	0.0263925	-2.22039	not40,txt3,wcu12	wcu4,wcu6	hct46,hct50,hct51,hct54,hct56,hcu15,not13,not43,not7,nou1,nou108,nou124,nou132,nou33,nou39,nou61,txt20,txt38,txt7,txu14,txu2,txu3,wcu13,wcu21	hct41,hct53,hcu18,hcu30,hcu32,nou102,nou104,txt26,txu20,txu4
chr448	113018	CPIJ013319	T	C	CGT	CGC	3	121	62	41	18	8	10	18	7	44	34	0.0108453	-0.222222	0.357143	0.886364	0.242424	0.564394	0.710744	0.0277884	-2.20026	azu1,azu28,azu3,azu6,not40,txt13,txt19,txt23,txt29,txt3,txt35,txt5,txu40,wcu17,wcu18,wcu2,wcu20,wcu5	azu5,txt39,txu8,wcu14,wcu15,wcu25,wcu4	azu19,azu8,hct41,hct43,hct51,hct53,hct60,hct64,hct65,hct66,hct73,hcu17,hcu2,hcu43,hcu8,not11,not13,not2,not4,not8,nou102,nou108,nou124,nou127,nou129,nou130,nou132,nou133,txt14,txt20,txt36,txt40,txt7,txt8,txu11,txu12,txu21,txu22,txu31,txu43,txu6,txu7,txu9,wcu8	hct42,hct46,hct54,hct61,hcu12,hcu15,hcu16,hcu18,hcu30,hcu31,hcu32,hcu5,not15,not19,not24,not43,not46,not7,nou107,nou134,nou30,nou33,nou39,txt26,txt38,txu13,txu14,txu18,txu2,txu20,txu3,txu39,txu4,wcu24
chr728	162859	CPIJ015681	A	G	GAA	GGA	2	124	41	72	11	6	5	13	16	28	56	0.00483667	-0.302211	0.267857	0.94382	0.171429	0.557624	0.725806	0.0282375	-2.19397	azu5,azu6,txt13,txt21,txt29,txt5,wcu11,wcu12,wcu14,wcu15,wcu18,wcu20,wcu25	azu1,azu3,not40,sebq,txt23,txt3,txt39,txu40,txu8,wcu10,wcu17,wcu19,wcu2,wcu4,wcu5,wcu6	azu8,hct43,hct51,hct61,hcu12,hcu13,hcu2,hcu32,hcu43,hcu8,not4,not43,not8,nou132,nou30,nou33,nou61,txt36,txt7,txu12,txu13,txu22,txu3,txu31,txu43,txu6,txu9,wcu13	azu19,hct41,hct42,hct46,hct50,hct53,hct54,hct56,hct60,hct64,hct65,hct66,hct70,hct73,hcu15,hcu17,hcu30,hcu31,hcu5,hcu9,not11,not13,not15,not19,not2,not24,not46,not7,nou1,nou102,nou104,nou107,nou108,nou124,nou127,nou129,nou130,nou133,nou134,nou39,txt14,txt20,txt26,txt38,txt40,txu11,txu14,txu18,txu20,txu21,txu39,txu4,txu7,wcu16,wcu24,wcu8
chr2	1633820	CPIJ000304	A	G	GAA	GAG	3	89	9	62	18	8	10	3	12	6	50	0.00492616	-0.241437	0.318396	0.848485	0.347826	0.598155	0.719101	0.0282571	-2.1937	azu6,not40,txt13	azu3,txt19,txt24,txt29,txt31,txt35,txt39,txt5,txu40,txu8,wcu18,wcu20	hct66,hcu12,hcu13,hcu17,nou130,nou33	azu19,hct41,hct42,hct43,hct50,hct51,hct73,hcu15,hcu16,hcu18,hcu2,hcu30,hcu31,hcu43,hcu5,hcu8,not11,not13,not15,not24,not4,not43,not46,not7,nou102,nou104,nou124,nou129,nou133,nou39,nou61,txt14,txt20,txt26,txt36,txt40,txt7,txt8,txu12,txu14,txu18,txu2,txu21,txu31,txu39,txu4,txu43,txu6,txu9,wcu24
chr2	1633832	CPIJ000304	T	C	GAT	GAC	3	89	9	62	18	8	10	3	12	6	50	0.00492616	-0.241437	0.318396	0.848485	0.347826	0.598155	0.719101	0.0282571	-2.1937	azu6,not40,txt13	azu3,txt19,txt24,txt29,txt31,txt35,txt39,txt5,txu40,txu8,wcu18,wcu20	hct66,hcu12,hcu13,hcu17,nou130,nou33	azu19,hct41,hct42,hct43,hct50,hct51,hct73,hcu15,hcu16,hcu18,hcu2,hcu30,hcu31,hcu43,hcu5,hcu8,not11,not13,not15,not24,not4,not43,not46,not7,nou102,nou104,nou124,nou129,nou133,nou39,nou61,txt14,txt20,txt26,txt36,txt40,txt7,txt8,txu12,txu14,txu18,txu2,txu21,txu31,txu39,txu4,txu43,txu6,txu9,wcu24
chr278	371841	CPIJ010546	C	A	CGT (ACG)	AGT (ACT)	3	110	21	25	64	24	40	4	4	17	21	0.00226852	-0.205986	0.338983	0.487179	0.75	0.61859	0.563636	0.0286865	-2.18777	azu1,azu3,wcu18,wcu2	wcu14,wcu19,wcu20,wcu6	hct43,hct53,hct56,hcu30,hcu43,not15,not2,not46,not8,nou127,nou129,nou130,nou134,txu13,txu3,txu43,txu9	azu8,hct42,hct66,hcu13,hcu16,hcu32,hcu8,hcu9,not13,not19,not24,not4,nou1,txt38,txt40,txu14,txu18,txu21,txu22,txu4,wcu13
chr448	113983	CPIJ013319	T	C	TTT	TTC	3	125	59	33	33	14	19	15	6	44	27	0.00402358	-0.208242	0.373907	0.788889	0.4	0.594444	0.68	0.0289342	-2.18438	azu1,txt13,txt19,txt21,txt23,txt29,txt31,txt35,txt5,txu40,wcu17,wcu2,wcu20,wcu4,wcu5	azu5,txt24,txt39,txu8,wcu14,wcu15	azu19,hct41,hct43,hct51,hct53,hct60,hct64,hct65,hct66,hcu18,hcu2,hcu43,hcu5,hcu9,not11,not13,not14,not2,nou104,nou108,nou127,nou129,nou130,nou132,nou133,nou134,txt14,txt20,txt36,txt38,txt40,txt7,txt8,txu11,txu12,txu18,txu20,txu22,txu31,txu4,txu43,txu7,txu9,wcu8	hct42,hct46,hct54,hct61,hcu12,hcu15,hcu16,hcu30,hcu31,hcu32,not15,not19,not24,not43,not46,not7,nou107,nou30,nou33,nou39,txt26,txu13,txu14,txu2,txu3,txu39,wcu24
chr2	1633777	CPIJ000304	G	A	GGA	GAA	2	88	8	67	13	6	7	3	13	5	54	0.0110091	-0.257313	0.29941	0.893939	0.272727	0.583333	0.738636	0.0292364	-2.18028	azu6,not40,wcu17	azu3,txt13,txt19,txt24,txt29,txt31,txt35,txt39,txt5,txu40,txu8,wcu18,wcu20	hct66,hct70,hcu12,nou130,nou30	azu19,hct41,hct42,hct43,hct50,hct51,hct73,hcu13,hcu15,hcu16,hcu17,hcu18,hcu2,hcu30,hcu31,hcu43,hcu5,hcu8,not11,not13,not15,not2,not24,not4,not43,not46,not7,nou102,nou104,nou124,nou129,nou133,nou33,nou39,nou61,txt14,txt20,txt26,txt36,txt40,txt7,txt8,txu12,txu14,txu18,txu2,txu21,txu31,txu39,txu4,txu43,txu6,txu9,wcu24
chr229	404552	CPIJ009404	G	A	GAC (GTC)	AAC (GTT)	3	122	30	9	83	29	54	5	1	25	8	0.00721061	-0.203564	0.317914	0.37931	0.828571	0.603941	0.508197	0.0298704	-2.1718	txt23,txt24,txt29,txu40,wcu11	not40	hct41,hct51,hct56,hct66,hcu15,hcu32,hcu5,hcu8,hcu9,not13,not14,not43,not7,nou102,nou104,nou108,nou124,nou134,nou39,nou61,txt14,txu18,txu21,txu22,txu9	hct53,hct73,hcu13,hcu31,not11,not46,nou33,wcu16
chr140	179481	CPIJ007135	T	A	GTT (AAC)	GAT (ATC)	2	71	5	13	53	20	33	0	1	5	12	0.000673312	-0.312842	0.113793	0.34	0.952381	0.64619	0.521127	0.0301647	-2.16792		txt35	hct61,hcu18,not8,txt38,wcu24	azu8,hcu5,not2,not24,not4,txt36,txt7,txu11,txu3,txu31,txu7,txu9
chr140	179476	CPIJ007135	G	A	CAG (CTG)	CAA (TTG)	1	71	5	13	53	20	33	0	1	5	12	0.000673312	-0.312842	0.113793	0.34	0.952381	0.64619	0.521127	0.0301647	-2.16792		txt35	hct61,hcu18,not8,txt38,wcu24	azu8,hcu5,not2,not24,not4,txt36,txt7,txu11,txu3,txu31,txu7,txu9
chr104	248350	CPIJ005957	T	G	CAT	CAG	3	125	64	7	54	20	34	15	0	49	7	0.00941181	-0.178063	0.404762	0.622222	0.571429	0.596825	0.608	0.0313822	-2.15219	azu1,azu28,azu3,azu5,azu6,not40,txt19,txt23,txt31,wcu11,wcu15,wcu17,wcu19,wcu5,wcu6		azu19,azu8,hct50,hct51,hct56,hct60,hct61,hct64,hct70,hct73,hcu13,hcu15,hcu16,hcu17,hcu18,hcu31,hcu8,not11,not13,not15,not19,not46,not8,nou1,nou107,nou108,nou127,nou129,nou130,nou132,nou134,nou30,nou33,nou39,nou61,txt40,txt7,txu14,txu2,txu20,txu3,txu31,txu4,txu43,txu6,txu9,wcu16,wcu24,wcu8	hct43,hct46,hct54,hct65,hcu12,hcu43,txu13
chr106	545995	CPIJ006068	C	T	CTG	TTG	1	125	57	34	34	13	21	17	5	40	29	0.0178733	-0.166353	0.445055	0.766667	0.371429	0.569048	0.656	0.0313959	-2.15202	azu1,azu28,azu3,azu6,not40,txt19,txt21,txt29,txt35,txt5,txu40,wcu11,wcu17,wcu18,wcu4,wcu5,wcu6	txt23,wcu1,wcu14,wcu2,wcu25	azu19,azu8,hct51,hct53,hct60,hct61,hct66,hcu15,hcu16,hcu18,hcu31,hcu32,hcu5,not11,not13,not46,not7,not8,nou104,nou107,nou108,nou124,nou130,nou132,nou33,nou39,nou61,txt20,txt38,txt40,txt8,txu12,txu18,txu2,txu21,txu39,txu6,txu9,wcu16,wcu8	hct42,hct43,hct46,hct54,hct56,hct65,hct73,hcu12,hcu13,hcu17,hcu2,hcu30,hcu43,hcu8,not15,nou133,txt14,txt36,txt7,txu11,txu13,txu20,txu3,txu31,txu43,txu7,wcu13,wcu21,wcu24
chr728	162832	CPIJ015681	A	T	TAC	TTC	2	123	41	71	11	6	5	13	16	28	55	0.00520013	-0.299553	0.271739	0.943182	0.171429	0.557305	0.723577	0.0315564	-2.14998	azu5,azu6,txt13,txt21,txt29,txt5,wcu11,wcu12,wcu14,wcu15,wcu18,wcu20,wcu25	azu1,azu3,not40,sebq,txt23,txt3,txt39,txu40,txu8,wcu10,wcu17,wcu19,wcu2,wcu4,wcu5,wcu6	azu8,hct43,hct51,hct61,hcu12,hcu13,hcu2,hcu32,hcu43,hcu8,not4,not43,not8,nou132,nou30,nou33,nou61,txt36,txt7,txu12,txu13,txu22,txu3,txu31,txu43,txu6,txu9,wcu13	azu19,hct41,hct42,hct46,hct50,hct53,hct54,hct56,hct60,hct64,hct65,hct66,hct70,hct73,hcu15,hcu17,hcu30,hcu31,hcu5,hcu9,not11,not13,not15,not19,not2,not24,not46,not7,nou1,nou102,nou107,nou108,nou124,nou127,nou129,nou130,nou133,nou134,nou39,txt14,txt20,txt26,txt38,txt40,txu11,txu14,txu18,txu20,txu21,txu39,txu4,txu7,wcu16,wcu24,wcu8
chr1224	39141	CPIJ018629	G	T	CGT (ACG)	CTT (AAG)	2	125	40	19	66	23	43	10	2	30	17	0.0111215	-0.168998	0.408967	0.522222	0.657143	0.589683	0.56	0.0340501	-2.11948	azu1,azu5,azu6,not40,txt13,txt24,txt29,txt5,txu40,wcu6	azu3,txt19	hct41,hct60,hct61,hct66,hcu16,hcu2,hcu30,hcu31,not11,not14,not19,not8,nou107,nou108,nou124,nou127,nou133,nou30,nou61,txt14,txt7,txu12,txu13,txu14,txu2,txu20,txu3,txu4,txu43,txu9	azu8,not2,not24,not4,not43,not46,not7,nou102,nou104,nou130,nou132,nou134,nou33,nou39,txt36,txt38,txt40
chr39	62671	CPIJ003082	C	A	CTC	CTA	3	125	66	13	46	17	29	17	1	49	12	0.0221754	-0.163043	0.443997	0.677778	0.485714	0.581746	0.624	0.0344654	-2.11458	azu6,not40,txt21,txt24,txt3,txt31,txt35,txt5,txu8,wcu10,wcu11,wcu12,wcu17,wcu18,wcu2,wcu5,wcu6	wcu25	hct41,hct42,hct43,hct46,hct50,hct53,hct65,hct73,hcu12,hcu16,hcu17,hcu18,hcu43,hcu5,hcu9,not11,not13,not15,not19,not24,not46,not8,nou1,nou108,nou127,nou129,nou132,nou30,nou33,nou39,txt26,txt40,txt7,txt8,txu11,txu13,txu14,txu2,txu20,txu21,txu22,txu3,txu39,txu43,txu6,txu7,txu9,wcu13,wcu8	hct54,hcu30,not14,not2,not4,not43,nou124,nou130,nou133,nou134,txt36,txu12
chr1199	10737	CPIJ018377	C	G	TCC	TCG	3	125	69	19	37	16	21	15	4	54	15	0.0028929	-0.217479	0.359375	0.766667	0.457143	0.611905	0.68	0.0346353	-2.1126	azu28,txt19,txt21,txt23,txt24,txt3,txt31,txt39,txt5,wcu1,wcu10,wcu11,wcu14,wcu20,wcu25	azu5,txt13,txt35,wcu15	hct41,hct43,hct50,hct51,hct54,hct56,hct60,hct61,hcu12,hcu15,hcu17,hcu2,hcu30,hcu31,hcu32,hcu43,hcu5,hcu9,not14,not15,not2,not43,not46,nou102,nou104,nou108,nou124,nou127,nou129,nou130,nou133,nou30,nou33,nou39,nou61,txt14,txt20,txt26,txt38,txt40,txt8,txu12,txu14,txu18,txu2,txu20,txu22,txu4,txu43,txu9,wcu13,wcu21,wcu24,wcu8	azu8,hct46,hct64,hct65,hcu18,not24,not7,nou107,nou132,txt36,txu11,txu39,txu6,txu7,wcu16
chr277	494835	CPIJ010480	A	G	CCA	CCG	3	123	44	42	37	15	22	10	8	34	34	0.00311159	-0.20228	0.373856	0.755556	0.454545	0.605051	0.674797	0.0346663	-2.11224	azu1,azu6,txt19,txt21,txt23,txt35,txu40,wcu15,wcu19,wcu20	azu5,not40,txt24,txt3,txt31,wcu1,wcu10,wcu6	azu8,hct46,hct51,hct53,hct70,hct73,hcu18,hcu2,hcu30,hcu9,not13,not14,not19,not24,not46,not8,nou104,nou108,nou124,nou129,nou130,nou134,nou33,txt20,txt38,txt7,txu12,txu14,txu18,txu21,txu31,txu6,wcu13,wcu16	azu19,hct41,hct43,hct50,hct56,hct64,hct66,hcu12,hcu13,hcu15,hcu17,hcu43,hcu5,hcu8,not11,not4,not43,not7,nou102,nou107,nou127,nou132,nou133,nou39,nou61,txt26,txt36,txt40,txu2,txu22,txu39,txu4,txu43,txu9
chr2	1633971	CPIJ000304	C	T	CTG	TTG	1	89	3	80	6	3	3	2	16	1	64	0.0311077	-0.291411	0.263566	0.955882	0.142857	0.54937	0.764045	0.0347094	-2.11173	not40,txt13	azu3,azu6,txt19,txt24,txt29,txt3,txt31,txt35,txt39,txt5,txu40,txu8,wcu17,wcu18,wcu19,wcu20	nou30	azu19,azu8,hct41,hct42,hct43,hct50,hct51,hct60,hct70,hct73,hcu12,hcu13,hcu15,hcu16,hcu17,hcu18,hcu2,hcu30,hcu31,hcu43,hcu5,hcu8,not11,not13,not15,not2,not24,not4,not43,not46,not7,not8,nou102,nou104,nou108,nou124,nou129,nou130,nou133,nou33,nou39,nou61,txt14,txt20,txt26,txt36,txt40,txt7,txt8,txu12,txu14,txu18,txu2,txu20,txu21,txu31,txu39,txu4,txu43,txu6,txu9,wcu13,wcu21,wcu24
chr140	179400	CPIJ007135	C	T	ACC (GGT)	ATC (GAT)	2	71	15	25	31	14	17	2	5	13	20	0.00202903	-0.266998	0.274933	0.66	0.666667	0.663333	0.661972	0.0348411	-2.1102	azu3,txt31	azu5,txt13,txt35,txu8,wcu25	hct61,hcu18,hcu31,not2,not46,nou107,nou129,nou61,txt36,txt38,txt40,txu13,txu31	azu8,hcu15,hcu5,hcu8,not15,not24,not4,not7,not8,nou102,nou130,nou33,txt7,txu11,txu2,txu3,txu7,txu9,wcu13,wcu24
chr728	162818	CPIJ015681	G	C	CAG	CAC	3	124	42	71	11	6	5	13	16	29	55	0.00501304	-0.300889	0.269784	0.94382	0.171429	0.557624	0.725806	0.0349744	-2.10865	azu5,azu6,txt13,txt21,txt29,txt5,wcu11,wcu12,wcu14,wcu15,wcu18,wcu20,wcu25	azu1,azu3,not40,sebq,txt23,txt3,txt39,txu40,txu8,wcu10,wcu17,wcu19,wcu2,wcu4,wcu5,wcu6	azu8,hct43,hct51,hct61,hcu12,hcu13,hcu2,hcu32,hcu43,hcu8,not4,not43,not8,nou104,nou132,nou30,nou33,nou61,txt36,txt7,txu12,txu13,txu22,txu3,txu31,txu43,txu6,txu9,wcu13	azu19,hct41,hct42,hct46,hct50,hct53,hct54,hct56,hct60,hct64,hct65,hct66,hct70,hct73,hcu15,hcu17,hcu30,hcu31,hcu5,hcu9,not11,not13,not15,not19,not2,not24,not46,not7,nou1,nou102,nou107,nou108,nou124,nou127,nou129,nou130,nou133,nou134,nou39,txt14,txt20,txt26,txt38,txt40,txu11,txu14,txu18,txu20,txu21,txu39,txu4,txu7,wcu16,wcu24,wcu8
chr35	864866	CPIJ002538	A	T	CAT	CTT	2	122	40	23	59	20	39	12	2	28	21	0.0174498	-0.152937	0.445714	0.556818	0.588235	0.572527	0.565574	0.0361989	-2.09469	not40,txt13,txt23,txt24,txt29,txt3,txt31,txt35,txt5,txu40,wcu4,wcu6	txt19,txt21	hct41,hct51,hct60,hct64,hct66,hct73,hcu12,hcu2,hcu30,hcu31,hcu9,not13,not14,not19,nou107,nou124,nou129,nou130,nou30,nou39,txt20,txt26,txt36,txt8,txu12,txu13,txu2,txu6	hcu32,hcu8,not11,not15,not2,not24,not4,not43,not46,not7,not8,nou1,nou102,nou104,nou108,nou127,nou132,nou133,nou134,nou33,txu9
chr156	130369	CPIJ006721	G	A	GAA (TTC)	AAA (TTT)	3	122	38	2	82	29	53	6	0	32	2	0.00860996	-0.210801	0.304598	0.390805	0.828571	0.609688	0.516393	0.036234	-2.09429	azu6,not40,txt19,txt21,txt23,wcu5		azu8,hct43,hct46,hct50,hct51,hct54,hct64,hct70,hcu12,hcu2,hcu31,hcu43,hcu9,not15,not2,not4,not46,nou102,nou104,nou108,nou129,nou132,nou33,nou39,txt40,txu12,txu18,txu2,txu3,txu43,wcu24,wcu8	hct41,hcu32
chr196	232328	CPIJ008566	A	C	GAA	GCA	2	124	28	11	85	29	56	3	2	25	9	0.00760312	-0.201176	0.314354	0.377778	0.852941	0.615359	0.508065	0.0374755	-2.08055	azu1,azu5,txt39	txt23,wcu1	azu19,azu8,hct53,hct56,hct61,hct64,hct65,hct66,hct70,hct73,hcu30,hcu43,not11,not43,not46,not7,nou104,nou129,nou30,nou33,nou39,txu20,txu31,txu4,txu43	hct43,hct46,hct60,nou1,txu11,txu12,txu7,wcu16,wcu21
chr448	113622	CPIJ013319	G	C	ACG	ACC	3	125	76	5	44	17	27	18	0	58	5	0.0130163	-0.177061	0.420415	0.7	0.485714	0.592857	0.64	0.0380998	-2.07378	azu1,azu5,sebq,txt13,txt19,txt21,txt23,txt24,txt29,txt39,txt5,txu40,txu8,wcu10,wcu14,wcu15,wcu20,wcu25		azu19,hct42,hct46,hct50,hct51,hct53,hct54,hct56,hct61,hct65,hct66,hct73,hcu15,hcu16,hcu17,hcu2,hcu30,hcu31,hcu43,hcu8,not11,not13,not19,not24,not4,not43,not46,not7,not8,nou107,nou129,nou133,nou134,nou30,nou33,nou39,txt14,txt20,txt36,txt38,txt40,txt7,txt8,txu12,txu13,txu14,txu18,txu2,txu20,txu22,txu3,txu31,txu39,txu4,txu6,txu9,wcu13,wcu24	not15,not2,txt26,txu43,txu7
chr25	1409662	CPIJ001759	T	C	ATT	ATC	3	124	45	47	32	13	19	12	9	33	38	0.00667927	-0.190423	0.402258	0.788889	0.382353	0.585621	0.677419	0.0392428	-2.06163	azu5,not40,txt29,txt35,txu40,wcu10,wcu11,wcu12,wcu14,wcu15,wcu18,wcu19	azu3,txt13,txt19,txt3,txt39,txt5,wcu1,wcu25,wcu6	azu19,hct42,hct46,hct50,hct51,hct56,hct60,hct66,hct73,hcu12,hcu13,not11,not19,not2,not24,not43,not46,not7,not8,nou102,nou107,nou108,nou133,nou134,txt38,txu11,txu18,txu20,txu39,txu4,txu7,wcu21,wcu24	azu8,hct41,hct53,hct54,hct64,hct65,hct70,hcu15,hcu16,hcu18,hcu30,hcu32,hcu5,hcu8,not13,not14,not15,not4,nou1,nou104,nou127,nou129,nou130,nou30,nou33,nou39,nou61,txt36,txt7,txu12,txu13,txu14,txu21,txu22,txu3,txu43,txu9,wcu13
chr1224	39136	CPIJ018629	G	C	TAG (CTA)	TAC (GTA)	1	125	41	20	64	22	42	11	2	30	18	0.0175673	-0.158565	0.433884	0.533333	0.628571	0.580952	0.56	0.0395705	-2.0582	azu1,azu28,azu5,azu6,not40,txt13,txt24,txt29,txt5,txu40,wcu6	azu3,txt19	hct41,hct60,hct61,hct66,hcu16,hcu2,hcu30,hcu31,not11,not14,not19,not8,nou107,nou108,nou124,nou127,nou133,nou30,nou61,txt14,txt7,txu12,txu13,txu14,txu2,txu20,txu3,txu4,txu43,txu9	azu8,not2,not24,not4,not43,not46,not7,nou102,nou104,nou130,nou132,nou134,nou33,nou39,txt36,txt38,txt40,wcu21
chr104	241651	CPIJ005954	T	C	GGT	GGC	3	125	59	15	51	19	32	14	2	45	13	0.0110575	-0.170302	0.426983	0.644444	0.542857	0.593651	0.616	0.0395861	-2.05804	azu1,azu28,azu3,azu5,azu6,not40,txt19,wcu10,wcu11,wcu15,wcu17,wcu2,wcu25,wcu5	sebq,wcu19	azu19,azu8,hct41,hct50,hct51,hct56,hct64,hct66,hct73,hcu13,hcu15,hcu16,hcu17,hcu18,hcu31,not11,not13,not15,not19,not46,not8,nou1,nou107,nou108,nou127,nou129,nou130,nou132,nou134,nou30,nou33,nou39,nou61,txt14,txt20,txt38,txt40,txt7,txu14,txu20,txu4,txu43,txu9,wcu24,wcu8	hct43,hct46,hct54,hct61,hct65,hct70,hcu12,hcu32,hcu43,txu12,txu13,txu3,wcu21
chr21	1115786	CPIJ002130	A	C	AGA	AGC	3	125	67	16	42	16	26	17	2	50	14	0.014371	-0.168831	0.4375	0.711111	0.457143	0.584127	0.64	0.0398296	-2.05551	azu1,azu5,azu6,not40,txt19,txt24,txt29,txt3,txt31,txt39,txt5,txu8,wcu11,wcu12,wcu14,wcu17,wcu2	sebq,txt23	azu8,hct41,hct42,hct43,hct46,hct51,hct53,hct61,hct64,hct65,hct66,hct70,hct73,hcu16,hcu17,hcu18,hcu30,hcu31,hcu43,hcu8,hcu9,not11,not13,not15,not24,not4,not46,not7,nou1,nou107,nou127,nou129,nou134,nou30,nou33,nou39,nou61,txt38,txt8,txu12,txu14,txu18,txu2,txu22,txu4,txu9,wcu16,wcu21,wcu24,wcu8	hct50,hct56,hcu13,hcu32,hcu5,not2,not43,not8,nou124,nou132,txu21,txu3,txu31,txu43
chr104	240924	CPIJ005953	A	G,T	AGT	GGT,TGT	1	123	55	6	62	23	39	11	1	44	5	0.0136901	-0.176938	0.408213	0.556818	0.657143	0.606981	0.585366	0.0400329	-2.05341	azu1,azu28,azu3,azu5,azu6,txt19,wcu11,wcu17,wcu19,wcu25,wcu5	sebq	azu19,azu8,hct46,hct50,hct51,hct53,hct54,hct56,hct64,hct66,hct70,hct73,hcu13,hcu15,hcu16,hcu17,hcu18,hcu31,hcu43,not11,not13,not15,not19,not46,not8,nou1,nou108,nou124,nou129,nou130,nou132,nou134,nou39,nou61,txt14,txt20,txt38,txu14,txu20,txu3,txu4,txu43,wcu24,wcu8	hct43,hct65,hcu12,hcu32,txu12
chr25	1410208	CPIJ001759	C	T	ATC	ATT	3	113	19	49	45	17	28	9	9	10	40	0.0308727	-0.147009	0.494118	0.641026	0.485714	0.56337	0.59292	0.0400435	-2.0533	azu28,not40,txt29,txt39,txu40,wcu10,wcu12,wcu15,wcu25	azu3,txt19,txt3,txt5,wcu1,wcu11,wcu14,wcu19,wcu6	hct46,hct60,hcu12,hcu13,not2,not24,not46,nou133,txu11,txu18	azu8,hct50,hct53,hct54,hct64,hct65,hct70,hcu15,hcu16,hcu18,hcu30,hcu32,hcu8,not11,not13,not15,not19,not4,not43,not7,nou102,nou108,nou127,nou129,nou130,nou134,nou30,nou39,nou61,txt38,txu12,txu13,txu21,txu22,txu3,txu43,txu9,wcu13,wcu21,wcu24
chr25	1410211	CPIJ001759	A	C	ACA	ACC	3	113	19	49	45	17	28	9	9	10	40	0.0308727	-0.147009	0.494118	0.641026	0.485714	0.56337	0.59292	0.0400435	-2.0533	azu28,not40,txt29,txt39,txu40,wcu10,wcu12,wcu15,wcu25	azu3,txt19,txt3,txt5,wcu1,wcu11,wcu14,wcu19,wcu6	hct46,hct60,hcu12,hcu13,not2,not24,not46,nou133,txu11,txu18	azu8,hct50,hct53,hct54,hct64,hct65,hct70,hcu15,hcu16,hcu18,hcu30,hcu32,hcu8,not11,not13,not15,not19,not4,not43,not7,nou102,nou108,nou127,nou129,nou130,nou134,nou30,nou39,nou61,txt38,txu12,txu13,txu21,txu22,txu3,txu43,txu9,wcu13,wcu21,wcu24
chr25	1410166	CPIJ001759	G	A	TCG	TCA	3	116	19	44	53	20	33	7	8	12	36	0.0108382	-0.162405	0.451786	0.592593	0.571429	0.582011	0.586207	0.04014	-2.05231	not40,txt19,txt29,txt39,txu40,wcu15,wcu25	azu3,txt3,txt5,wcu1,wcu11,wcu14,wcu19,wcu6	hct56,hct60,hcu12,hcu30,not19,not2,not24,nou133,txu11,txu18,wcu21,wcu24	azu8,hct50,hct53,hct54,hct64,hct65,hct70,hcu15,hcu16,hcu18,hcu32,hcu8,not11,not13,not15,not4,not43,not7,nou102,nou108,nou127,nou129,nou130,nou134,nou30,nou39,nou61,txt38,txu12,txu13,txu21,txu22,txu3,txu43,txu9,wcu13
chr293	108267	CPIJ010814	C	T,A	CGC (GCG)	CGT,CGA (ACG,TCG)	1	124	66	12	46	18	28	15	2	51	10	0.00980819	-0.180193	0.416275	0.685393	0.514286	0.599839	0.637097	0.0422742	-2.03081	azu28,azu3,azu5,azu6,txt24,txt31,txt35,txt39,txt5,txu40,wcu1,wcu14,wcu15,wcu18,wcu19	txt21,wcu11	azu19,hct41,hct42,hct43,hct50,hct54,hct56,hct60,hct64,hct66,hct70,hcu12,hcu15,hcu16,hcu30,hcu31,hcu32,hcu43,hcu5,not11,not14,not2,not24,not4,not43,not8,nou108,nou124,nou130,nou132,nou30,txt20,txt26,txt40,txt7,txt8,txu11,txu14,txu18,txu20,txu21,txu3,txu4,txu43,txu6,txu7,txu9,wcu13,wcu16,wcu21,wcu24	hct46,hct53,not15,nou134,txt38,txu12,txu13,txu2,txu22,txu31
chr281	98506	CPIJ010805	T	A	TCC (GGA)	ACC (GGT)	3	125	32	1	92	31	61	4	0	28	1	0.0135562	-0.219309	0.262366	0.322222	0.885714	0.603968	0.48	0.0429495	-2.0242	not40,txt3,wcu17,wcu5		azu19,hct53,hct66,hct73,hcu12,hcu18,hcu31,hcu5,hcu8,not14,not15,not24,not7,not8,nou104,nou107,nou127,nou129,nou132,nou133,nou134,nou30,nou39,txt20,txt38,txu3,wcu21,wcu8	hct64
chr281	98509	CPIJ010805	A	G	ATT (AAT)	GTT (AAC)	3	125	32	1	92	31	61	4	0	28	1	0.0135562	-0.219309	0.262366	0.322222	0.885714	0.603968	0.48	0.0429495	-2.0242	not40,txt3,wcu17,wcu5		azu19,hct53,hct66,hct73,hcu12,hcu18,hcu31,hcu5,hcu8,not14,not15,not24,not7,not8,nou104,nou107,nou127,nou129,nou132,nou133,nou134,nou30,nou39,txt20,txt38,txu3,wcu21,wcu8	hct64
chr36	427893	CPIJ002678	T	C	ACT	ACC	3	114	20	18	76	26	50	2	3	18	15	0.00544257	-0.199248	0.320513	0.39759	0.83871	0.61815	0.517544	0.0440172	-2.01393	azu3,txt19	txt23,txt5,wcu1	azu8,hct42,hct56,hct70,hct73,hcu8,nou1,nou104,nou133,txt8,txu13,txu18,txu20,txu21,txu31,txu39,txu9,wcu16	hct46,hct50,hct51,hct60,hct65,hcu18,hcu32,hcu43,not46,nou102,nou33,nou39,txt14,txt7,txu3
chr247	466511	CPIJ009474	T	C	TTG	CTG	1	32	0	29	3	2	1	0	5	0	24	0.0177304	-0.494253	0.104167	0.96	0.285714	0.622857	0.8125	0.0468283	-1.98785		txt31,txt5,txu40,wcu4,wcu6		azu19,azu8,hct42,hct61,hct64,hct66,hct73,hcu12,hcu13,hcu2,not15,not19,not46,not8,nou33,txt20,txt36,txt7,txt8,txu12,txu18,txu21,txu3,txu31
chr140	179331	CPIJ007135	C	T	GCC (GGC)	GTC (GAC)	2	66	5	12	49	18	31	0	1	5	11	0.00214902	-0.298381	0.127572	0.340426	0.947368	0.643897	0.515152	0.0469878	-1.98641		txt35	hct61,hcu18,not8,txt38,wcu24	azu8,hcu5,not2,not24,not4,txt36,txt7,txu11,txu3,txu31,txu7
chr140	179342	CPIJ007135	C	T	CCA (TGG)	TCA (TGA)	3	66	5	12	49	18	31	0	1	5	11	0.00214902	-0.298381	0.127572	0.340426	0.947368	0.643897	0.515152	0.0469878	-1.98641		txt35	hct61,hcu18,not8,txt38,wcu24	azu8,hcu5,not2,not24,not4,txt36,txt7,txu11,txu3,txu31,txu7
chr39	62776	CPIJ003082	T	A	CGT	CGA	3	125	63	16	46	18	28	14	3	49	13	0.0102928	-0.180778	0.414815	0.688889	0.514286	0.601587	0.64	0.0479606	-1.97772	azu6,txt21,txt24,txt3,txt31,txt35,txt5,txu8,wcu10,wcu11,wcu12,wcu18,wcu2,wcu6	wcu17,wcu25,wcu5	hct41,hct42,hct43,hct46,hct50,hct53,hct65,hct73,hcu12,hcu16,hcu17,hcu18,hcu43,hcu5,hcu9,not11,not13,not15,not19,not24,not46,not8,nou1,nou108,nou127,nou129,nou132,nou30,nou33,nou39,txt26,txt40,txt7,txt8,txu11,txu13,txu14,txu2,txu20,txu21,txu22,txu3,txu39,txu43,txu6,txu7,txu9,wcu13,wcu24	hct54,hcu30,not14,not2,not4,not43,nou124,nou130,nou133,nou134,txt36,txu12,wcu8
chr39	62025	CPIJ003082	A	G	GGA	GGG	3	120	61	13	46	16	30	15	1	46	12	0.0289735	-0.152424	0.455357	0.659091	0.5	0.579545	0.616667	0.0481581	-1.97597	azu6,not40,txt21,txt3,txt35,txt5,txu8,wcu10,wcu11,wcu12,wcu17,wcu18,wcu2,wcu5,wcu6	wcu25	hct42,hct43,hct46,hct50,hct53,hct65,hct73,hcu12,hcu16,hcu17,hcu43,hcu5,hcu9,not11,not13,not15,not19,not24,not46,not8,nou1,nou108,nou127,nou129,nou132,nou30,nou39,txt26,txt40,txt7,txt8,txu11,txu13,txu14,txu2,txu20,txu21,txu22,txu3,txu39,txu43,txu6,txu7,txu9,wcu13,wcu8	hct54,hcu30,not2,not4,not43,nou124,nou130,nou133,nou134,nou61,txt36,txu12
chr36	92201	CPIJ002663	T	C	GAT	GAC	3	121	49	35	37	13	24	15	5	34	30	0.0433146	-0.141267	0.490998	0.727273	0.393939	0.560606	0.636364	0.0494262	-1.9649	azu28,azu5,azu6,not40,txt19,txt29,txt35,wcu10,wcu12,wcu17,wcu18,wcu20,wcu25,wcu4,wcu5	azu1,txt21,txt3,txu8,wcu2	azu19,hct56,hct60,hct65,hct66,hct70,hcu13,hcu16,hcu2,not24,not43,not8,nou1,nou108,nou130,nou132,nou133,nou30,nou39,txt14,txt20,txt36,txt38,txt40,txt8,txu21,txu3,txu31,txu39,txu9,wcu13,wcu16,wcu24,wcu8	hct41,hct43,hct46,hct50,hct51,hct54,hct61,hct64,hct73,hcu15,hcu17,hcu30,hcu31,hcu32,hcu43,hcu9,not11,not13,not46,nou102,nou107,nou124,nou127,nou129,nou134,txu12,txu13,txu18,txu43,wcu21
aCodons in parentheses are relevant ones when the opposite strand was originally sequenced in the genome.

## Sheet: Permethrin
ID	POS	Gene	REF	ALT	Codon	Alt. Codon	Codon Pos.	# Called	# Heterozygous	# Homozygous Alt. Allele	# Homozygous Ref. Allele	# Ref. Susceptible (Group 1)	# Ref. Resistant (Group 2)	# Heterozygous Alt. Susceptible (Group 1)	# Homozygous Alt. Susceptible (Group 1)	# Heterozygous Alt. Resistant (Group 2)	# Homozygous Alt. Resistant (Group 2)	P-Val., Fisher Exact	FE Statistic	Odds Ratio	Sensitivity	Specificity	AUC (Average Sens,Spec)	Accuracy	P-Val., Cochran-Armitage	Cochran-Armitage Statistic	Heterozygous Alt. Susceptible Samples	Homozygous Alt. Susceptible Samples	Heterozygous Alt. Resistant Samples	Homozygous Alt. Resistant Samples
chr182	510969	CPIJ007595	T	A	TAA (TTA)a	AAA (TTT)	3	107	21	67	19	8	11	5	1	16	66	2.4081e-08	-0.375891	0.0650338	0.88172	0.571429	0.726575	0.841121	1.05122e-06	-4.8818	txu7,wcu12,wcu15,wcu17,wcu4	wcu1	hct51,hct61,hct66,hcu43,not13,not46,nou1,nou132,nou134,nou39,nou61,txt19,txu20,txu43,wcu16,wcu24	azu1,azu19,azu28,azu3,azu5,azu6,azu8,hct42,hct46,hct50,hct53,hct54,hct56,hct60,hct64,hct65,hct73,hcu12,hcu13,hcu15,hcu16,hcu17,hcu18,hcu2,hcu30,hcu31,hcu32,hcu5,hcu8,hcu9,not11,not14,not19,not2,not24,not4,not7,not8,nou108,nou127,nou30,txt13,txt14,txt20,txt21,txt23,txt26,txt3,txt35,txt40,txt5,txt7,txt8,txu13,txu18,txu22,txu6,wcu10,wcu13,wcu14,wcu18,wcu19,wcu2,wcu20,wcu21,wcu25
chr278	372189	CPIJ010546	T	G	TGT (ACA)	GGT (ACC)	3	120	52	44	24	8	16	9	1	43	43	5.54345e-05	-0.254762	0.170543	0.843137	0.444444	0.643791	0.783333	0.000524216	-3.46807	not40,txu2,txu21,txu4,wcu1,wcu11,wcu15,wcu17,wcu6	wcu4	azu19,azu28,azu6,azu8,hct41,hct42,hct51,hct54,hct64,hct65,hct73,hcu12,hcu17,not15,not24,not43,not8,nou1,nou102,nou132,nou30,nou39,nou61,txt14,txt19,txt20,txt29,txt35,txt38,txt39,txt40,txt5,txt8,txu13,txu14,txu18,txu22,wcu13,wcu14,wcu19,wcu20,wcu5,wcu8	azu1,azu3,hct43,hct46,hct50,hct53,hct56,hct60,hct61,hct66,hct70,hcu13,hcu15,hcu16,hcu2,hcu30,hcu31,hcu32,hcu43,hcu5,hcu8,hcu9,not13,not19,not2,not4,not46,not7,nou127,nou129,nou130,nou133,nou134,nou33,txt21,txt23,txu20,txu3,txu43,txu9,wcu16,wcu18,wcu2
chr278	371696	CPIJ010546	G	A	CAG (CTG)	CAA (TTG)	1	125	61	35	29	10	19	8	1	53	34	1.47494e-05	-0.268492	0.157025	0.820755	0.526316	0.673535	0.776	0.0005711	-3.44498	not40,txu21,txu4,wcu1,wcu11,wcu15,wcu17,wcu6	wcu4	azu19,azu28,azu6,azu8,hct42,hct50,hct51,hct54,hct60,hct64,hct65,hct66,hct73,hcu12,hcu17,hcu31,hcu5,not15,not2,not24,not7,not8,nou1,nou132,nou133,nou134,nou30,nou39,nou61,txt14,txt19,txt20,txt23,txt24,txt29,txt35,txt38,txt39,txt40,txt5,txt8,txu13,txu14,txu18,txu22,txu9,wcu13,wcu14,wcu19,wcu2,wcu20,wcu5,wcu8	azu1,azu3,hct41,hct43,hct46,hct53,hct56,hct61,hct70,hcu13,hcu15,hcu16,hcu2,hcu30,hcu32,hcu43,hcu8,hcu9,not13,not19,not4,not46,nou127,nou129,nou130,nou33,txt21,txt31,txu20,txu3,txu43,wcu16,wcu18,wcu25
chr512	35545	CPIJ013918	C	T	ATC	ATT	3	101	17	41	43	13	30	3	1	14	40	6.06896e-06	-0.251821	0.12275	0.642857	0.764706	0.703782	0.663366	0.000711286	-3.38519	txu4,wcu1,wcu4	wcu6	azu19,azu8,hct41,hct46,hct61,hct70,hct73,hcu2,hcu8,hcu9,txt29,txt35,txt38,txt5	hct42,hct51,hct53,hct64,hcu13,hcu15,hcu16,hcu17,hcu18,hcu30,hcu5,not14,not15,not24,not43,not7,nou107,nou108,nou124,nou127,nou129,nou130,nou132,nou133,nou30,nou33,nou39,txt20,txt23,txt3,txt36,txu13,txu14,txu20,txu22,txu3,txu6,txu9,wcu13,wcu25
chr512	35005	CPIJ013918	T	A	CTT	CTA	3	106	14	49	43	12	31	2	2	12	47	1.41833e-05	-0.225498	0.146226	0.655556	0.75	0.702778	0.669811	0.001541	-3.16685	txu4,wcu4	txu8,wcu6	azu19,hct46,hct66,hcu2,hcu8,nou102,nou104,txt13,txt14,txt5,txu13,wcu25	azu1,azu28,azu3,azu5,azu6,azu8,hct41,hct42,hct43,hct51,hct53,hct61,hct64,hct70,hct73,hcu13,hcu15,hcu16,hcu17,hcu18,hcu30,hcu5,hcu9,not14,not15,not43,not46,not7,nou107,nou124,nou127,nou129,nou130,nou132,nou133,nou30,nou39,txt20,txt23,txt3,txt36,txt38,txu20,txu22,txu3,txu9,wcu13
chr512	35069	CPIJ013918	T	A	TAC	AAC	1	113	27	44	42	12	30	3	2	24	42	2.00977e-05	-0.224845	0.162037	0.6875	0.705882	0.696691	0.690265	0.0019756	-3.09388	txu4,wcu1,wcu4	txu8,wcu6	azu19,azu8,hct46,hct54,hct61,hct66,hct70,hcu2,hcu5,hcu8,nou102,nou104,txt13,txt24,txt29,txt35,txt38,txt5,txt7,txu13,txu18,txu3,wcu13,wcu25	hct41,hct42,hct43,hct50,hct51,hct53,hct64,hct73,hcu12,hcu13,hcu15,hcu16,hcu17,hcu18,hcu30,hcu9,not14,not15,not43,not46,not7,nou107,nou124,nou127,nou129,nou130,nou132,nou133,nou30,nou39,nou61,txt20,txt21,txt23,txt26,txt3,txt36,txu14,txu20,txu22,txu9,wcu24
chr512	31057	CPIJ013917	C	T	TCT (AGA)	TTT (AAA)	2	125	22	49	54	14	40	3	2	19	47	3.12558e-05	-0.200926	0.176991	0.622642	0.736842	0.679742	0.64	0.00210199	-3.07543	txu4,wcu1,wcu4	sebq,wcu6	azu19,azu8,hct46,hct50,hct54,hct66,hct70,hcu8,not2,not46,nou104,nou134,txt24,txt26,txt5,txt7,txu18,wcu21,wcu25	hct41,hct42,hct51,hct53,hct61,hct64,hct73,hcu12,hcu13,hcu15,hcu16,hcu17,hcu18,hcu2,hcu30,hcu5,hcu9,not14,not15,not43,not7,not8,nou107,nou108,nou124,nou127,nou129,nou130,nou132,nou133,nou30,nou33,nou39,nou61,txt20,txt21,txt23,txt3,txt36,txt38,txu13,txu20,txu22,txu3,txu9,wcu13,wcu24
chr512	36184	CPIJ013918	C	T	ACC	ATC	2	111	12	42	57	14	43	2	1	10	41	3.00604e-05	-0.203947	0.13354	0.542553	0.823529	0.683041	0.585586	0.00266227	-3.00426	txu4,wcu4	wcu6	azu8,hct43,hct46,hct70,hcu8,hcu9,nou33,txt23,txt5,wcu25	azu19,hct41,hct42,hct51,hct53,hct61,hct64,hct73,hcu13,hcu15,hcu16,hcu17,hcu18,hcu2,hcu30,hcu5,not14,not15,not19,not43,not7,nou107,nou124,nou127,nou129,nou130,nou132,nou133,nou30,nou39,txt20,txt3,txt36,txt38,txu13,txu20,txu22,txu3,txu9,wcu13,wcu21
chr104	245887	CPIJ005956	G	T	CGA	CTA	2	125	9	114	2	2	0	2	15	7	99	0.000429695	-0.864979	0	1	0.105263	0.552632	0.864	0.00271228	-2.99859	txu40,wcu1	not40,txu11,txu2,txu21,txu31,txu39,txu4,txu7,txu8,wcu11,wcu12,wcu15,wcu17,wcu4,wcu6	nou124,nou129,txt14,txt20,txt38,txt7,txu14	azu1,azu19,azu28,azu3,azu5,azu6,azu8,hct41,hct42,hct43,hct46,hct50,hct51,hct53,hct54,hct56,hct60,hct61,hct64,hct65,hct66,hct70,hct73,hcu12,hcu13,hcu15,hcu16,hcu17,hcu18,hcu2,hcu30,hcu31,hcu32,hcu43,hcu5,hcu8,hcu9,not11,not13,not14,not15,not19,not2,not24,not4,not43,not46,not7,not8,nou1,nou102,nou104,nou107,nou108,nou127,nou130,nou132,nou133,nou134,nou30,nou33,nou39,nou61,txt13,txt19,txt21,txt23,tx…
chr278	365463	CPIJ010544	T	A	GGT	GGA	3	122	52	38	32	9	23	8	1	44	37	0.000358457	-0.203125	0.216573	0.778846	0.5	0.639423	0.737705	0.00280324	-2.98853	not40,txu2,txu21,txu4,wcu1,wcu11,wcu15,wcu17	wcu4	azu19,azu28,azu8,hct41,hct42,hct50,hct51,hct54,hct60,hct66,hct73,hcu17,hcu31,hcu5,not15,not19,not7,nou1,nou132,nou133,nou134,nou30,nou39,nou61,txt14,txt19,txt20,txt23,txt24,txt29,txt35,txt39,txt40,txt5,txt8,txu14,txu22,txu43,txu9,wcu13,wcu20,wcu25,wcu5,wcu8	azu1,azu3,azu6,hct43,hct46,hct53,hct56,hct61,hct64,hct70,hcu13,hcu15,hcu16,hcu2,hcu30,hcu32,hcu43,hcu8,hcu9,not13,not2,not24,not4,not46,not8,nou127,nou129,nou130,nou33,txt21,txt31,txu20,txu3,wcu14,wcu16,wcu18,wcu2
chr512	30930	CPIJ013917	T	A	TAT (ATA)	AAT (ATT)	3	113	37	25	51	14	37	3	1	34	24	8.14023e-05	-0.217039	0.16115	0.610526	0.777778	0.694152	0.637168	0.00397596	-2.88006	txu4,wcu1,wcu4	wcu6	azu19,azu8,hct46,hct50,hct51,hct53,hct54,hct66,hct70,hct73,hcu15,hcu2,hcu5,hcu8,nou107,nou127,nou129,nou130,nou132,nou133,nou30,nou39,txt23,txt24,txt26,txt36,txt5,txt7,txu13,txu18,txu3,wcu13,wcu24,wcu25	hct41,hct42,hct64,hcu12,hcu13,hcu16,hcu17,hcu18,hcu30,hcu9,not14,not15,not2,not43,not46,not7,nou124,txt20,txt21,txt3,txt38,txu20,txu22,txu9
chr104	245840	CPIJ005956	C	T	AGC	AGT	3	123	2	119	2	2	0	0	17	2	102	0.000512304	-0.858333	0	1	0.105263	0.552632	0.861789	0.00404997	-2.87424		not40,txu11,txu2,txu21,txu31,txu39,txu4,txu40,txu7,txu8,wcu1,wcu11,wcu12,wcu15,wcu17,wcu4,wcu6	txt14,txt38	azu1,azu19,azu28,azu3,azu5,azu6,azu8,hct41,hct42,hct43,hct46,hct50,hct51,hct53,hct54,hct56,hct60,hct61,hct64,hct66,hct70,hct73,hcu12,hcu13,hcu15,hcu16,hcu17,hcu18,hcu2,hcu30,hcu31,hcu32,hcu43,hcu5,hcu8,hcu9,not11,not13,not14,not15,not19,not2,not24,not4,not43,not46,not7,not8,nou1,nou102,nou104,nou107,nou108,nou124,nou127,nou129,nou130,nou132,nou133,nou134,nou30,nou33,nou39,nou61,txt13,txt19,txt20,…
chr278	365244	CPIJ010544	G	A	CAG	CAA	3	125	59	31	35	10	25	8	1	51	30	0.000346484	-0.20307	0.225225	0.764151	0.526316	0.645233	0.728	0.00412455	-2.86848	not40,txu21,txu4,wcu1,wcu11,wcu15,wcu17,wcu6	wcu4	azu19,azu28,azu6,azu8,hct42,hct50,hct51,hct54,hct60,hct65,hct66,hcu17,hcu31,hcu5,not15,not19,not7,not8,nou1,nou129,nou132,nou133,nou134,nou30,nou39,nou61,txt14,txt19,txt20,txt23,txt24,txt29,txt31,txt35,txt39,txt40,txt5,txt8,txu13,txu14,txu22,txu3,txu43,txu9,wcu13,wcu14,wcu19,wcu20,wcu25,wcu5,wcu8	azu1,azu3,hct43,hct46,hct53,hct56,hct61,hct70,hcu13,hcu15,hcu16,hcu2,hcu30,hcu32,hcu43,hcu8,hcu9,not13,not2,not24,not4,not46,nou127,nou130,nou33,txt21,txu20,wcu16,wcu18,wcu2
chr512	34656	CPIJ013918	T	A	AGT	AGA	3	115	24	31	60	15	45	2	1	22	30	9.1106e-05	-0.203488	0.146341	0.536082	0.833333	0.684708	0.582609	0.00459867	-2.83388	txu4,wcu4	wcu6	azu19,azu8,hct41,hct46,hct53,hct61,hct66,hct70,hct73,hcu12,hcu2,hcu8,not46,nou102,nou33,txt23,txt38,txt5,txu13,txu3,wcu13,wcu25	hct42,hct51,hct64,hcu13,hcu15,hcu16,hcu17,hcu18,hcu30,hcu5,hcu9,not14,not15,not43,not7,nou107,nou124,nou127,nou129,nou130,nou132,nou133,nou30,nou39,txt20,txt3,txt36,txu20,txu22,txu9
chr278	365034	CPIJ010544	T	C	GGT	GGC	3	125	57	32	36	10	26	8	1	49	31	0.000438604	-0.195133	0.234234	0.754717	0.526316	0.640516	0.72	0.00471485	-2.8259	not40,txu2,txu21,txu4,wcu11,wcu15,wcu17,wcu6	wcu4	azu19,azu6,azu8,hct42,hct51,hct54,hct60,hct64,hct65,hct66,hct73,hcu17,hcu31,hcu5,not15,not19,not2,not7,not8,nou129,nou132,nou133,nou134,nou30,nou39,nou61,txt14,txt19,txt20,txt23,txt24,txt29,txt31,txt35,txt39,txt40,txt5,txt8,txu13,txu22,txu43,txu9,wcu13,wcu14,wcu19,wcu20,wcu25,wcu5,wcu8	azu1,azu3,hct43,hct46,hct50,hct53,hct56,hct61,hct70,hcu13,hcu15,hcu16,hcu2,hcu30,hcu32,hcu43,hcu8,hcu9,not13,not24,not4,not46,nou127,nou130,nou33,txt21,txu20,txu3,wcu16,wcu18,wcu2
chr278	365010	CPIJ010544	G	A	GCG	GCA	3	125	56	36	33	9	24	9	1	47	35	0.00110093	-0.18679	0.250712	0.773585	0.473684	0.623635	0.728	0.00471993	-2.82555	not40,txu2,txu21,txu4,wcu11,wcu12,wcu15,wcu17,wcu6	wcu4	azu19,azu6,azu8,hct42,hct51,hct54,hct60,hct64,hct65,hct66,hct73,hcu17,not15,not19,not2,not7,not8,nou108,nou129,nou132,nou133,nou134,nou30,nou39,nou61,txt14,txt19,txt20,txt23,txt24,txt29,txt31,txt35,txt39,txt40,txt5,txt8,txu13,txu22,txu43,wcu13,wcu14,wcu19,wcu20,wcu25,wcu5,wcu8	azu1,azu3,hct43,hct46,hct50,hct53,hct56,hct61,hct70,hcu13,hcu15,hcu16,hcu2,hcu30,hcu31,hcu32,hcu43,hcu5,hcu8,hcu9,not13,not24,not4,not46,nou127,nou130,nou33,txt21,txu20,txu3,txu9,wcu16,wcu18,wcu2,wcu24
chr278	365031	CPIJ010544	T	C	ACT	ACC	3	125	56	36	33	9	24	9	1	47	35	0.00110093	-0.18679	0.250712	0.773585	0.473684	0.623635	0.728	0.00471993	-2.82555	not40,txu2,txu21,txu4,wcu11,wcu12,wcu15,wcu17,wcu6	wcu4	azu19,azu6,azu8,hct42,hct51,hct54,hct60,hct64,hct65,hct66,hct73,hcu17,not15,not19,not2,not7,not8,nou108,nou129,nou132,nou133,nou134,nou30,nou39,nou61,txt14,txt19,txt20,txt23,txt24,txt29,txt31,txt35,txt39,txt40,txt5,txt8,txu13,txu22,txu43,wcu13,wcu14,wcu19,wcu20,wcu25,wcu5,wcu8	azu1,azu3,hct43,hct46,hct50,hct53,hct56,hct61,hct70,hcu13,hcu15,hcu16,hcu2,hcu30,hcu31,hcu32,hcu43,hcu5,hcu8,hcu9,not13,not24,not4,not46,nou127,nou130,nou33,txt21,txu20,txu3,txu9,wcu16,wcu18,wcu2,wcu24
chr278	365049	CPIJ010544	G	A	CAG	CAA	3	124	56	32	36	10	26	8	1	48	31	0.000759593	-0.194444	0.236364	0.752381	0.526316	0.639348	0.717742	0.00487938	-2.81489	not40,txu2,txu21,txu4,wcu11,wcu15,wcu17,wcu6	wcu4	azu19,azu6,azu8,hct42,hct51,hct54,hct60,hct64,hct65,hct66,hct73,hcu17,hcu31,hcu5,not15,not19,not2,not7,not8,nou129,nou132,nou133,nou134,nou30,nou39,nou61,txt14,txt19,txt20,txt23,txt24,txt29,txt31,txt35,txt39,txt40,txt5,txt8,txu13,txu22,txu43,txu9,wcu13,wcu14,wcu19,wcu20,wcu5,wcu8	azu1,azu3,hct43,hct46,hct50,hct53,hct56,hct61,hct70,hcu13,hcu15,hcu16,hcu2,hcu30,hcu32,hcu43,hcu8,hcu9,not13,not24,not4,not46,nou127,nou130,nou33,txt21,txu20,txu3,wcu16,wcu18,wcu2
chr512	31284	CPIJ013917	T	C	TCC (GGA)	CCC (GGG)	3	123	19	45	59	14	45	2	2	17	43	0.000135037	-0.182242	0.18724	0.571429	0.777778	0.674603	0.601626	0.0055909	-2.77086	txu4,wcu1	wcu4,wcu6	azu19,hct50,hct66,hcu12,hcu17,hcu8,not46,nou102,nou104,nou107,txt21,txt24,txt26,txt36,txt5,txt7,txu18	azu8,hct41,hct42,hct46,hct51,hct53,hct54,hct61,hct64,hct70,hct73,hcu13,hcu15,hcu16,hcu18,hcu2,hcu30,hcu5,hcu9,not14,not15,not43,not7,nou124,nou127,nou129,nou130,nou132,nou133,nou30,nou39,txt20,txt23,txt3,txt38,txu13,txu20,txu22,txu3,txu9,wcu13,wcu24,wcu25
chr512	34683	CPIJ013918	C	T	TTC	TTT	3	106	12	40	54	14	40	1	2	11	38	8.9371e-05	-0.204911	0.164204	0.550562	0.823529	0.687046	0.59434	0.00584975	-2.75609	txu4	wcu4,wcu6	azu19,azu8,hct46,hct66,hct70,hcu12,hcu8,not46,nou102,txt38,wcu25	hct41,hct42,hct51,hct53,hct64,hct73,hcu13,hcu15,hcu16,hcu17,hcu18,hcu30,hcu5,hcu9,not14,not15,not43,not7,nou107,nou124,nou127,nou129,nou130,nou132,nou133,nou30,nou39,txt20,txt23,txt3,txt36,txt5,txu13,txu20,txu22,txu3,txu9,wcu13
chr278	365238	CPIJ010544	C	T	TAC	TAT	3	125	58	37	30	8	22	10	1	48	36	0.00333071	-0.175758	0.275	0.792453	0.421053	0.606753	0.736	0.00612356	-2.74109	not40,txu21,txu31,txu4,txu8,wcu1,wcu11,wcu15,wcu17,wcu6	wcu4	azu19,azu28,azu6,azu8,hct42,hct51,hct54,hct60,hct65,hct66,hcu17,not15,not19,not7,not8,nou1,nou124,nou129,nou132,nou133,nou134,nou30,nou39,nou61,txt14,txt19,txt20,txt23,txt24,txt29,txt31,txt35,txt38,txt39,txt40,txt5,txt8,txu13,txu14,txu22,txu43,wcu13,wcu14,wcu19,wcu20,wcu25,wcu5,wcu8	azu1,azu3,hct43,hct46,hct50,hct53,hct56,hct61,hct70,hcu13,hcu15,hcu16,hcu2,hcu30,hcu31,hcu32,hcu43,hcu5,hcu8,hcu9,not13,not2,not24,not4,not46,nou127,nou130,nou33,txt21,txu20,txu3,txu9,wcu16,wcu18,wcu2,wcu24
chr278	365722	CPIJ010544	T	C	TCT	CCT	1	120	53	34	33	9	24	9	1	44	33	0.00149833	-0.181818	0.266667	0.762376	0.473684	0.61803	0.716667	0.00654691	-2.71905	not40,txu2,txu21,txu4,wcu1,wcu11,wcu15,wcu17,wcu6	wcu4	azu19,azu28,azu8,hct41,hct42,hct51,hct54,hct60,hct64,hct66,hct73,hcu17,not15,not2,not46,not7,nou1,nou124,nou129,nou132,nou133,nou134,nou30,nou39,nou61,txt14,txt20,txt23,txt24,txt29,txt31,txt35,txt39,txt40,txt5,txt8,txu14,txu22,txu43,wcu13,wcu20,wcu25,wcu5,wcu8	azu1,azu3,azu6,hct43,hct46,hct50,hct53,hct56,hcu13,hcu15,hcu16,hcu2,hcu30,hcu31,hcu32,hcu43,hcu5,hcu8,hcu9,not13,not24,not4,nou127,nou130,nou33,txt21,txu13,txu20,txu3,txu9,wcu18,wcu2,wcu24
chr278	365724	CPIJ010544	T	C	TCT	TCC	3	120	53	34	33	9	24	9	1	44	33	0.00149833	-0.181818	0.266667	0.762376	0.473684	0.61803	0.716667	0.00654691	-2.71905	not40,txu2,txu21,txu4,wcu1,wcu11,wcu15,wcu17,wcu6	wcu4	azu19,azu28,azu8,hct41,hct42,hct51,hct54,hct60,hct64,hct66,hct73,hcu17,not15,not2,not46,not7,nou1,nou124,nou129,nou132,nou133,nou134,nou30,nou39,nou61,txt14,txt20,txt23,txt24,txt29,txt31,txt35,txt39,txt40,txt5,txt8,txu14,txu22,txu43,wcu13,wcu20,wcu25,wcu5,wcu8	azu1,azu3,azu6,hct43,hct46,hct50,hct53,hct56,hcu13,hcu15,hcu16,hcu2,hcu30,hcu31,hcu32,hcu43,hcu5,hcu8,hcu9,not13,not24,not4,nou127,nou130,nou33,txt21,txu13,txu20,txu3,txu9,wcu18,wcu2,wcu24
chr512	35479	CPIJ013918	G	A	AAG	AAA	3	118	40	35	43	12	31	5	2	35	33	0.000406305	-0.197252	0.230198	0.686869	0.631579	0.659224	0.677966	0.00732378	-2.68175	txu11,txu4,txu7,txu8,wcu4	not40,wcu6	azu1,azu19,azu6,azu8,hct41,hct42,hct46,hct53,hct56,hct61,hct66,hct70,hct73,hcu12,hcu2,hcu5,hcu8,hcu9,not4,not46,nou39,nou61,txt13,txt19,txt20,txt23,txt38,txt40,txt5,txt8,txu18,txu3,wcu13,wcu19,wcu25	hct51,hct64,hcu13,hcu15,hcu16,hcu17,hcu18,hcu30,hcu43,not13,not14,not15,not19,not2,not24,not43,not7,nou107,nou124,nou127,nou129,nou130,nou132,nou133,nou30,nou33,txt26,txt3,txt36,txu13,txu20,txu22,txu9
chr278	364926	CPIJ010544	C	T	TTC	TTT	3	125	27	33	65	15	50	3	1	24	32	0.000295699	-0.177006	0.189394	0.528302	0.789474	0.658888	0.568	0.00748516	-2.67445	txu2,wcu11,wcu15	wcu4	azu6,hct60,hct64,hct66,hct73,hcu17,hcu31,not24,not7,nou133,nou134,nou30,nou33,txt19,txt20,txt23,txt31,txt39,txu13,txu14,txu22,txu43,wcu25,wcu8	azu1,azu3,hct43,hct46,hct50,hct53,hct56,hct61,hct70,hcu13,hcu15,hcu16,hcu2,hcu30,hcu32,hcu43,hcu5,hcu8,hcu9,not13,not4,not46,nou127,nou130,txt21,txu20,txu3,txu9,wcu16,wcu18,wcu2,wcu24
chr278	364929	CPIJ010544	A	G	GGA	GGG	3	125	27	33	65	15	50	3	1	24	32	0.000295699	-0.177006	0.189394	0.528302	0.789474	0.658888	0.568	0.00748516	-2.67445	txu2,wcu11,wcu15	wcu4	azu6,hct60,hct64,hct66,hct73,hcu17,hcu31,not24,not7,nou133,nou134,nou30,nou33,txt19,txt20,txt23,txt31,txt39,txu13,txu14,txu22,txu43,wcu25,wcu8	azu1,azu3,hct43,hct46,hct50,hct53,hct56,hct61,hct70,hcu13,hcu15,hcu16,hcu2,hcu30,hcu32,hcu43,hcu5,hcu8,hcu9,not13,not4,not46,nou127,nou130,txt21,txu20,txu3,txu9,wcu16,wcu18,wcu2,wcu24
chr512	35482	CPIJ013918	T	A	AAT	AAA	3	118	29	24	65	16	49	2	1	27	23	0.000244988	-0.194206	0.167808	0.505051	0.842105	0.673578	0.559322	0.00849939	-2.63156	txu4,wcu4	wcu6	azu19,azu8,hct41,hct42,hct46,hct53,hct61,hct70,hct73,hcu12,hcu2,hcu5,hcu8,hcu9,not15,not46,nou130,nou39,txt20,txt23,txt36,txt38,txt5,txu20,txu3,wcu13,wcu25	hct51,hct64,hcu13,hcu15,hcu16,hcu17,hcu18,hcu30,not14,not19,not43,not7,nou107,nou124,nou127,nou129,nou132,nou133,nou30,txt3,txu13,txu22,txu9
chr104	241609	CPIJ005954	A	G	CCA	CCG	3	125	58	12	55	14	41	5	0	53	12	0.000396285	-0.19357	0.190167	0.613208	0.736842	0.675025	0.632	0.00890578	-2.61565	not40,txu4,wcu11,wcu15,wcu17		azu1,azu19,azu28,azu3,azu5,azu6,azu8,hct50,hct51,hct56,hct64,hct66,hct70,hct73,hcu13,hcu15,hcu16,hcu17,hcu18,hcu31,hcu32,not11,not13,not15,not19,not46,not8,nou1,nou107,nou108,nou127,nou129,nou130,nou132,nou134,nou30,nou33,nou39,nou61,txt14,txt19,txt20,txt38,txt40,txt7,txu14,txu43,txu9,wcu2,wcu24,wcu25,wcu5,wcu8	hct43,hct46,hct54,hct61,hct65,hcu12,hcu43,txu13,txu3,wcu10,wcu19,wcu21
chr278	364911	CPIJ010544	T	C	GAT	GAC	3	125	30	34	61	14	47	4	1	26	33	0.000596696	-0.168284	0.218944	0.556604	0.736842	0.646723	0.584	0.0089614	-2.61352	txu2,wcu11,wcu15,wcu6	wcu4	azu6,hct60,hct64,hct66,hct73,hcu17,not24,not7,not8,nou108,nou133,nou134,nou30,nou33,txt19,txt20,txt23,txt31,txt35,txt39,txu13,txu14,txu22,txu43,wcu25,wcu8	azu1,azu3,hct43,hct46,hct50,hct53,hct56,hct61,hct70,hcu13,hcu15,hcu16,hcu2,hcu30,hcu31,hcu32,hcu43,hcu5,hcu8,hcu9,not13,not4,not46,nou127,nou130,txt21,txu20,txu3,txu9,wcu16,wcu18,wcu2,wcu24
chr278	365868	CPIJ010544	A	T	ACA	ACT	3	123	52	32	39	10	29	8	1	44	31	0.00204141	-0.170203	0.273585	0.721154	0.526316	0.623735	0.691057	0.00940198	-2.59708	not40,txu2,txu21,txu4,wcu1,wcu11,wcu17,wcu6	wcu4	azu19,azu28,azu6,azu8,hct41,hct42,hct50,hct54,hct60,hct64,hct66,hct73,hcu17,hcu31,not15,not2,not7,not8,nou1,nou132,nou133,nou134,nou30,nou39,nou61,txt14,txt20,txt23,txt24,txt29,txt31,txt35,txt39,txt40,txt5,txt8,txu14,txu22,txu43,wcu13,wcu20,wcu25,wcu5,wcu8	azu1,azu3,hct43,hct46,hct53,hct56,hct70,hcu13,hcu15,hcu16,hcu2,hcu30,hcu32,hcu43,hcu5,hcu8,hcu9,not13,not24,not4,not46,nou127,nou129,nou130,nou33,txt21,txu20,txu3,txu9,wcu18,wcu2
chr278	364959	CPIJ010544	C	T	TTC	TTT	3	109	19	25	65	16	49	1	1	18	24	0.000171411	-0.202676	0.139205	0.461538	0.888889	0.675214	0.53211	0.00951396	-2.59301	wcu17	wcu15	azu6,hct60,hct64,hct66,hcu17,not15,not24,not7,nou30,nou61,txt14,txt19,txt23,txt24,txt31,txt39,txu22,txu43	azu1,azu3,hct46,hct50,hct53,hct56,hcu13,hcu15,hcu16,hcu30,hcu32,hcu43,hcu8,hcu9,not13,not4,not46,nou127,nou130,nou33,txt21,txu20,txu3,txu9
chr512	30275	CPIJ013917	A	G	AAA (TTT)	GAA (TTC)	3	125	27	43	55	12	43	6	1	21	42	0.0020095	-0.147385	0.273016	0.59434	0.631579	0.612959	0.6	0.00969031	-2.58669	txu39,txu4,txu40,txu8,wcu1,wcu6	wcu4	azu19,hct46,hct50,hct54,hct66,hcu12,hcu17,hcu8,not46,nou102,nou107,nou133,txt21,txt24,txt26,txt29,txt31,txt7,txu14,txu18,wcu24	azu8,hct41,hct42,hct51,hct53,hct61,hct64,hct70,hct73,hcu13,hcu15,hcu16,hcu18,hcu2,hcu30,hcu5,hcu9,not14,not15,not43,not7,nou124,nou127,nou129,nou130,nou132,nou30,nou33,nou39,txt20,txt23,txt3,txt36,txt38,txt5,txu13,txu20,txu22,txu3,txu9,wcu13,wcu25
chr2	1633713	CPIJ000304	G	A	GAT	AAT	1	79	0	78	1	1	0	0	10	0	68	0.0186245	-0.871795	0	1	0.0909091	0.545455	0.873418	0.0102511	-2.56724		not40,txu12,txu2,txu21,txu31,txu39,txu4,txu40,txu8,wcu17		azu19,azu3,azu6,hct41,hct42,hct43,hct50,hct51,hct61,hct66,hct70,hct73,hcu12,hcu13,hcu15,hcu16,hcu17,hcu18,hcu2,hcu30,hcu31,hcu43,hcu5,hcu8,not11,not13,not15,not2,not24,not4,not43,not46,not7,nou102,nou104,nou124,nou129,nou130,nou133,nou30,nou33,nou39,nou61,txt13,txt14,txt19,txt20,txt24,txt26,txt29,txt31,txt35,txt36,txt39,txt40,txt5,txt7,txt8,txu14,txu18,txu43,txu6,txu9,wcu13,wcu18,wcu19,wcu20,wcu24
chr2	1633721	CPIJ000304	C	T	TAC	TAT	3	79	0	78	1	1	0	0	10	0	68	0.0186245	-0.871795	0	1	0.0909091	0.545455	0.873418	0.0102511	-2.56724		not40,txu12,txu2,txu21,txu31,txu39,txu4,txu40,txu8,wcu17		azu19,azu3,azu6,hct41,hct42,hct43,hct50,hct51,hct61,hct66,hct70,hct73,hcu12,hcu13,hcu15,hcu16,hcu17,hcu18,hcu2,hcu30,hcu31,hcu43,hcu5,hcu8,not11,not13,not15,not2,not24,not4,not43,not46,not7,nou102,nou104,nou124,nou129,nou130,nou133,nou30,nou33,nou39,nou61,txt13,txt14,txt19,txt20,txt24,txt26,txt29,txt31,txt35,txt36,txt39,txt40,txt5,txt7,txt8,txu14,txu18,txu43,txu6,txu9,wcu13,wcu18,wcu19,wcu20,wcu24
chr163	177414	CPIJ007188	G	A	GAG	GAA	3	113	22	30	61	14	47	2	1	20	29	0.000345667	-0.180728	0.172161	0.510417	0.823529	0.666973	0.557522	0.0105911	-2.55591	txu4,txu40	wcu15	azu1,azu19,azu8,hct42,hct50,hct54,hct56,hct60,hct66,not46,not7,nou30,nou39,txt14,txt20,txt24,txt5,txu14,txu18,wcu25	azu3,hct41,hct46,hcu12,hcu13,hcu15,hcu16,hcu17,hcu31,hcu32,hcu8,not13,not43,not8,nou108,nou124,nou134,txt13,txt19,txt3,txt35,txt39,txt40,txu13,wcu14,wcu18,wcu19,wcu21,wcu24
chr512	35176	CPIJ013918	C	T	CGC	CGT	3	122	21	38	63	15	48	2	2	19	36	0.000382706	-0.17624	0.210989	0.533981	0.789474	0.661727	0.57377	0.0106398	-2.55431	txu39,txu4	wcu4,wcu6	azu19,azu8,hct46,hct60,hct61,hct66,hct70,hcu2,hcu8,not11,nou102,nou104,nou33,txt38,txt5,txu3,wcu13,wcu16,wcu25	hct41,hct42,hct51,hct53,hct64,hct73,hcu13,hcu15,hcu16,hcu17,hcu18,hcu30,hcu5,hcu9,not14,not15,not43,not46,not7,nou107,nou124,nou127,nou129,nou130,nou132,nou133,nou30,nou39,txt20,txt23,txt3,txt36,txu13,txu20,txu22,txu9
chr512	34374	CPIJ013918	T	C	CAT	CAC	3	99	19	26	54	14	40	2	1	17	25	0.000531204	-0.202921	0.170576	0.512195	0.823529	0.667862	0.565657	0.0109118	-2.54551	txu4,wcu4	wcu6	azu8,hct41,hct42,hct46,hct53,hct73,hcu16,hcu5,hcu9,nou39,txt20,txt23,txt38,txt5,txu3,wcu13,wcu25	hct51,hct64,hcu13,hcu15,hcu17,hcu18,hcu30,not14,not15,not43,not7,nou107,nou124,nou127,nou129,nou130,nou132,nou133,nou30,txt3,txt36,txu13,txu20,txu22,txu9
chr278	365427	CPIJ010544	C	G	CCC	CCG	3	125	63	38	24	6	18	12	1	51	37	0.0149828	-0.149281	0.336	0.830189	0.315789	0.572989	0.752	0.0109677	-2.54373	not40,txu2,txu21,txu31,txu4,txu8,wcu1,wcu11,wcu12,wcu15,wcu17,wcu6	wcu4	azu19,azu28,azu6,azu8,hct41,hct42,hct51,hct54,hct60,hct64,hct65,hct66,hct73,hcu17,not15,not19,not7,not8,nou1,nou108,nou124,nou129,nou132,nou133,nou134,nou30,nou39,nou61,txt14,txt19,txt20,txt23,txt24,txt29,txt35,txt38,txt39,txt40,txt5,txt8,txu13,txu14,txu22,txu43,wcu13,wcu14,wcu19,wcu20,wcu25,wcu5,wcu8	azu1,azu3,hct43,hct46,hct50,hct53,hct56,hct61,hct70,hcu13,hcu15,hcu16,hcu2,hcu30,hcu31,hcu32,hcu43,hcu5,hcu8,hcu9,not13,not2,not24,not4,not46,nou127,nou130,nou33,txt21,txt31,txu20,txu3,txu9,wcu16,wcu18,wcu2,wcu24
chr104	245736	CPIJ005956	A	G	AAT	GAT	1	125	4	119	2	2	0	0	17	4	102	0.000495745	-0.859504	0	1	0.105263	0.552632	0.864	0.0112787	-2.53394		not40,txu11,txu2,txu21,txu31,txu39,txu4,txu40,txu7,txu8,wcu1,wcu11,wcu12,wcu15,wcu17,wcu4,wcu6	nou124,txt14,txt38,txt7	azu1,azu19,azu28,azu3,azu5,azu6,azu8,hct41,hct42,hct43,hct46,hct50,hct51,hct53,hct54,hct56,hct60,hct61,hct64,hct65,hct66,hct70,hct73,hcu12,hcu13,hcu15,hcu16,hcu17,hcu18,hcu2,hcu30,hcu31,hcu32,hcu43,hcu5,hcu8,hcu9,not11,not13,not14,not15,not19,not2,not24,not4,not43,not46,not7,not8,nou1,nou102,nou104,nou107,nou108,nou127,nou129,nou130,nou132,nou133,nou134,nou30,nou33,nou39,nou61,txt13,txt19,txt20,t…
chr512	35761	CPIJ013918	C	T	CTC	CTT	3	101	21	44	36	10	26	3	3	18	41	0.000734917	-0.195209	0.234	0.694118	0.625	0.659559	0.683168	0.0114408	-2.52894	txu4,txu8,wcu4	txu2,wcu1,wcu6	azu8,hct41,hct42,hct46,hct53,hct70,hct73,hcu8,hcu9,txt13,txt20,txt23,txt29,txt35,txt5,txu3,wcu14,wcu25	azu19,hct50,hct51,hct61,hct64,hcu13,hcu15,hcu16,hcu17,hcu18,hcu2,hcu30,hcu32,hcu5,not14,not15,not43,not46,not7,nou107,nou124,nou127,nou129,nou130,nou132,nou133,nou30,nou39,txt26,txt3,txt36,txt38,txt39,txt40,txu13,txu14,txu20,txu22,txu9,wcu13,wcu19
chr278	365712	CPIJ010544	T	C	CTT	CTC	3	122	55	32	35	9	26	9	1	46	31	0.00333554	-0.164706	0.294239	0.747573	0.473684	0.610629	0.704918	0.0114415	-2.52892	not40,txu2,txu21,txu4,wcu1,wcu11,wcu15,wcu17,wcu6	wcu4	azu19,azu28,azu6,azu8,hct41,hct42,hct51,hct54,hct60,hct64,hct66,hct73,hcu17,not15,not2,not46,not7,nou1,nou124,nou129,nou132,nou133,nou134,nou30,nou39,nou61,txt14,txt20,txt23,txt24,txt29,txt31,txt35,txt39,txt40,txt5,txt8,txu13,txu14,txu22,txu43,wcu13,wcu20,wcu25,wcu5,wcu8	azu1,azu3,hct43,hct46,hct50,hct53,hct56,hcu13,hcu15,hcu16,hcu2,hcu30,hcu31,hcu32,hcu43,hcu5,hcu8,hcu9,not13,not24,not4,nou127,nou130,nou33,txt21,txu20,txu3,txu9,wcu18,wcu2,wcu24
chr278	365691	CPIJ010544	A	C	ATA	ATC	3	121	53	32	36	9	27	8	1	45	31	0.00288774	-0.16453	0.280374	0.737864	0.5	0.618932	0.702479	0.0118873	-2.51547	not40,txu2,txu21,txu4,wcu1,wcu11,wcu15,wcu6	wcu4	azu19,azu28,azu6,azu8,hct41,hct42,hct51,hct54,hct60,hct64,hct66,hct73,hcu17,not15,not2,not46,not7,nou1,nou124,nou129,nou132,nou133,nou134,nou30,nou39,nou61,txt14,txt20,txt23,txt24,txt29,txt31,txt35,txt39,txt40,txt5,txt8,txu13,txu14,txu22,txu43,wcu20,wcu25,wcu5,wcu8	azu1,azu3,hct43,hct46,hct50,hct53,hct56,hcu13,hcu15,hcu16,hcu2,hcu30,hcu31,hcu32,hcu43,hcu5,hcu8,hcu9,not13,not24,not4,nou127,nou130,nou33,txt21,txu20,txu3,txu9,wcu18,wcu2,wcu24
chr278	365742	CPIJ010544	C	T	CTC	CTT	3	122	59	29	34	9	25	9	1	50	28	0.00306576	-0.170689	0.28826	0.757282	0.473684	0.615483	0.713115	0.0123207	-2.50282	not40,txu2,txu21,txu4,wcu1,wcu11,wcu15,wcu17,wcu6	wcu4	azu19,azu28,azu8,hct41,hct42,hct50,hct51,hct54,hct60,hct64,hct66,hct73,hcu17,hcu31,hcu5,not15,not19,not2,not46,not7,nou1,nou124,nou129,nou132,nou133,nou134,nou30,nou39,nou61,txt14,txt20,txt23,txt24,txt29,txt31,txt35,txt39,txt40,txt5,txt8,txu13,txu14,txu22,txu43,wcu13,wcu20,wcu24,wcu25,wcu5,wcu8	azu1,azu3,azu6,hct43,hct46,hct53,hct56,hcu13,hcu15,hcu16,hcu2,hcu30,hcu32,hcu43,hcu8,hcu9,not13,not24,not4,nou127,nou130,nou33,txt21,txu20,txu3,txu9,wcu18,wcu2
chr104	245792	CPIJ005956	A	G	GTA	GTG	3	124	11	112	1	1	0	3	15	8	97	0.0212758	-0.859574	0	1	0.0526316	0.526316	0.854839	0.0123914	-2.5008	sebq,txu40,wcu1	not40,txu11,txu2,txu21,txu31,txu39,txu4,txu7,txu8,wcu11,wcu12,wcu15,wcu17,wcu4,wcu6	hct66,nou124,nou129,txt14,txt20,txt38,txt7,txu14	azu1,azu19,azu28,azu3,azu5,azu6,azu8,hct41,hct42,hct43,hct46,hct50,hct51,hct53,hct54,hct56,hct60,hct61,hct64,hct70,hct73,hcu12,hcu13,hcu15,hcu16,hcu17,hcu18,hcu2,hcu30,hcu31,hcu32,hcu43,hcu5,hcu8,hcu9,not11,not13,not14,not15,not19,not2,not24,not4,not43,not46,not7,not8,nou1,nou102,nou104,nou107,nou108,nou127,nou130,nou132,nou133,nou134,nou30,nou33,nou39,nou61,txt13,txt19,txt21,txt23,txt24,txt26,tx…
chr512	35503	CPIJ013918	C	T,A	CCC	CCT,CCA	3	119	28	79	12	4	8	7	8	21	71	0.012349	-0.209677	0.282209	0.92	0.210526	0.565263	0.806723	0.0126146	-2.49447	txu12,txu31,txu39,txu40,txu8,wcu15,wcu17	not40,txu11,txu21,txu4,txu7,wcu11,wcu4,wcu6	azu19,hct56,hct66,hcu12,hcu2,not24,not4,not46,nou1,nou104,nou33,nou61,txt14,txt35,txt38,txu14,txu18,txu43,wcu10,wcu14,wcu5	azu1,azu28,azu3,azu5,azu6,azu8,hct41,hct42,hct46,hct51,hct53,hct54,hct60,hct61,hct64,hct65,hct70,hct73,hcu13,hcu15,hcu16,hcu17,hcu18,hcu30,hcu31,hcu43,hcu5,hcu8,hcu9,not13,not14,not15,not19,not2,not43,not7,not8,nou102,nou107,nou124,nou127,nou129,nou130,nou132,nou133,nou30,nou39,txt13,txt19,txt20,txt23,txt24,txt26,txt29,txt3,txt31,txt36,txt5,txt7,txt8,txu13,txu20,txu22,txu3,txu9,wcu13,wcu18,wcu2,w…
chr278	364893	CPIJ010544	C	T	GAC	GAT	3	125	32	34	59	13	46	5	1	27	33	0.00219088	-0.150339	0.266336	0.566038	0.684211	0.625124	0.584	0.0153091	-2.42498	txu2,wcu11,wcu12,wcu15,wcu6	wcu4	azu6,hct60,hct64,hct66,hct73,hcu17,not24,not7,not8,nou108,nou133,nou134,nou30,nou33,txt19,txt20,txt23,txt31,txt35,txt39,txu13,txu14,txu22,txu43,wcu19,wcu25,wcu8	azu1,azu3,hct43,hct46,hct50,hct53,hct56,hct61,hct70,hcu13,hcu15,hcu16,hcu2,hcu30,hcu31,hcu32,hcu43,hcu5,hcu8,hcu9,not13,not4,not46,nou127,nou130,txt21,txu20,txu3,txu9,wcu16,wcu18,wcu2,wcu24
chr278	365696	CPIJ010544	A	T	GAA	GTA	2	121	50	16	55	13	42	5	0	45	16	0.00123469	-0.175388	0.20979	0.592233	0.722222	0.657228	0.61157	0.0159238	-2.41066	txu21,txu4,wcu11,wcu15,wcu6		azu1,azu3,azu6,azu8,hct41,hct42,hct43,hct53,hct54,hct56,hct60,hct66,hct73,hcu2,hcu43,not15,not2,not4,not46,nou1,nou127,nou129,nou130,nou134,nou30,nou33,nou39,txt14,txt20,txt23,txt24,txt29,txt31,txt35,txt40,txt5,txt8,txu13,txu14,txu20,txu22,txu43,wcu18,wcu20,wcu25	hct46,hcu13,hcu15,hcu16,hcu30,hcu31,hcu32,hcu5,hcu8,hcu9,not13,not24,txt21,txu3,txu9,wcu2
chr25	1410472	CPIJ001759	C	A	GTC	GTA	3	18	1	13	4	2	2	1	0	0	13	0.00599448	-0.462963	0.0384615	0.866667	0.666667	0.766667	0.833333	0.0163466	-2.40108	txu4			hct61,hcu30,hcu5,nou107,nou129,txt13,txt19,txt29,txt35,txt36,txt7,txt8,txu14
chr228	585169	CPIJ009085	A	G	AAC	GAC	1	124	35	78	11	4	7	7	8	28	70	0.00612084	-0.243218	0.239583	0.933333	0.210526	0.57193	0.822581	0.0171065	-2.38441	txu11,txu2,txu40,txu7,wcu1,wcu11,wcu4	txu21,txu31,txu39,txu4,txu8,wcu12,wcu17,wcu6	azu3,hct46,hct61,hct64,hct66,hcu12,hcu15,hcu18,hcu8,hcu9,not24,not8,nou102,nou132,nou134,nou61,txt14,txt20,txt23,txt26,txt35,txt40,txt7,txt8,txu14,txu3,wcu18,wcu20	azu1,azu19,azu28,azu5,azu6,azu8,hct41,hct42,hct43,hct50,hct51,hct53,hct54,hct56,hct60,hct65,hct70,hct73,hcu13,hcu16,hcu17,hcu2,hcu30,hcu31,hcu32,hcu43,hcu5,not11,not13,not14,not15,not19,not2,not4,not43,not46,not7,nou1,nou107,nou124,nou127,nou129,nou130,nou133,nou30,nou33,nou39,txt13,txt19,txt21,txt3,txt31,txt36,txt38,txt39,txu13,txu20,txu22,txu43,txu6,txu9,wcu10,wcu13,wcu14,wcu16,wcu19,wcu2,wcu21…
chr278	364877	CPIJ010544	G	A	CGA	CAA	2	125	31	34	60	13	47	5	1	26	33	0.003888	-0.14596	0.275084	0.556604	0.684211	0.620407	0.576	0.0176889	-2.37207	txu2,wcu11,wcu12,wcu15,wcu6	wcu4	azu6,hct60,hct64,hct66,hct73,hcu17,not24,not7,not8,nou108,nou133,nou134,nou30,nou33,txt19,txt20,txt23,txt31,txt35,txt39,txu13,txu22,txu43,wcu19,wcu25,wcu8	azu1,azu3,hct43,hct46,hct50,hct53,hct56,hct61,hct70,hcu13,hcu15,hcu16,hcu2,hcu30,hcu31,hcu32,hcu43,hcu5,hcu8,hcu9,not13,not4,not46,nou127,nou130,txt21,txu20,txu3,txu9,wcu16,wcu18,wcu2,wcu24
chr313	58897	CPIJ011127	C	T	CGT (ACG)	TGT (ACA)	3	122	43	16	63	15	48	3	1	40	15	0.00184088	-0.171429	0.228571	0.533981	0.789474	0.661727	0.57377	0.0187129	-2.3512	not40,txu12,wcu17	wcu12	azu28,azu3,azu8,hct43,hct46,hct51,hct54,hct66,hct73,hcu13,hcu16,hcu18,hcu31,hcu43,not13,not14,not2,not24,not4,not46,not7,nou1,nou124,nou134,nou30,nou33,nou39,txt21,txt23,txt39,txt40,txt5,txt8,txu18,txu20,txu3,txu43,txu9,wcu21,wcu24	azu5,azu6,hcu9,not11,nou130,nou132,nou133,nou61,txt36,txu22,txu6,wcu13,wcu20,wcu5,wcu8
chr278	364887	CPIJ010544	G	T	GTG	GTT	3	125	30	30	65	14	51	4	1	26	29	0.00237754	-0.148718	0.260204	0.518868	0.736842	0.627855	0.552	0.0209868	-2.30822	txu2,wcu11,wcu15,wcu6	wcu4	azu6,hct50,hct60,hct64,hct66,hcu17,hcu31,hcu5,not24,not7,not8,nou133,nou134,nou30,nou33,txt19,txt20,txt23,txt31,txt39,txu13,txu14,txu22,txu43,wcu25,wcu8	azu1,azu3,hct43,hct46,hct53,hct56,hct61,hct70,hcu13,hcu15,hcu16,hcu2,hcu30,hcu32,hcu43,hcu8,hcu9,not13,not4,not46,nou127,nou130,txt21,txu20,txu3,txu9,wcu16,wcu18,wcu2
chr464	221790	CPIJ013723	T	G	TTG (CAA)	GTG (CAC)	3	77	4	43	30	8	22	1	3	3	40	0.0023714	-0.188889	0.231928	0.661538	0.666667	0.664103	0.662338	0.0221919	-2.28707	wcu15	not40,txu8,wcu11	not7,txt21,txu14	azu19,azu6,hct42,hct46,hct50,hct61,hct65,hcu12,hcu15,hcu17,hcu2,hcu31,not11,not13,not14,not24,not4,not46,not8,nou107,nou127,nou134,nou30,nou39,txt20,txt29,txt35,txt40,txt8,txu13,txu22,txu3,txu6,txu9,wcu13,wcu16,wcu19,wcu20,wcu24,wcu25
chr464	221793	CPIJ013723	A	G	AAT (ATT)	GAT (ATC)	3	77	4	43	30	8	22	1	3	3	40	0.0023714	-0.188889	0.231928	0.661538	0.666667	0.664103	0.662338	0.0221919	-2.28707	wcu15	not40,txu8,wcu11	not7,txt21,txu14	azu19,azu6,hct42,hct46,hct50,hct61,hct65,hcu12,hcu15,hcu17,hcu2,hcu31,not11,not13,not14,not24,not4,not46,not8,nou107,nou127,nou134,nou30,nou39,txt20,txt29,txt35,txt40,txt8,txu13,txu22,txu3,txu6,txu9,wcu13,wcu16,wcu19,wcu20,wcu24,wcu25
chr12	1650300	CPIJ001081	A	G	ATC	GTC	1	122	47	8	67	15	52	3	0	44	8	0.00176766	-0.176262	0.173333	0.5	0.833333	0.666667	0.54918	0.0232538	-2.26924	txu39,wcu1,wcu6		azu1,azu28,azu3,azu6,hct42,hct43,hct50,hct51,hct53,hct64,hct66,hct70,hct73,hcu12,hcu43,not15,not19,not43,not7,not8,nou1,nou102,nou108,nou133,nou30,nou39,txt19,txt35,txt36,txt38,txt7,txt8,txu13,txu20,txu22,txu3,txu43,txu6,txu9,wcu14,wcu18,wcu21,wcu24,wcu25	hct56,hcu13,hcu2,hcu31,hcu8,not24,nou127,nou130
chr278	364848	CPIJ010544	T	C	TTT	TTC	3	125	29	34	62	13	49	5	1	24	33	0.00434124	-0.137512	0.293162	0.537736	0.684211	0.610973	0.56	0.023331	-2.26797	txu2,wcu11,wcu12,wcu15,wcu6	wcu4	azu6,azu8,hct60,hct64,hct66,hcu17,not24,not7,not8,nou133,nou134,nou30,nou33,txt19,txt20,txt23,txt31,txt35,txt39,txu13,txu22,txu43,wcu5,wcu8	azu1,azu3,hct43,hct46,hct50,hct53,hct56,hct61,hct70,hcu13,hcu15,hcu16,hcu2,hcu30,hcu31,hcu32,hcu43,hcu5,hcu8,hcu9,not13,not4,not46,nou127,nou130,txt21,txu20,txu3,txu9,wcu16,wcu18,wcu2,wcu24
chr512	35443	CPIJ013918	C	T	TTC	TTT	3	117	28	40	49	10	39	7	1	21	39	0.0158231	-0.120748	0.354545	0.606061	0.555556	0.580808	0.598291	0.0253218	-2.23646	txu11,txu4,txu7,txu8,wcu1,wcu12,wcu4	wcu6	azu8,hct41,hct42,hct46,hct53,hct66,hct73,hcu12,hcu8,not46,txt13,txt19,txt23,txt29,txt35,txt38,txt5,txt8,txu14,wcu19,wcu25	azu19,hct51,hct61,hct64,hct70,hcu13,hcu15,hcu16,hcu17,hcu18,hcu2,hcu30,hcu5,hcu9,not14,not15,not19,not43,not7,nou107,nou124,nou127,nou129,nou130,nou132,nou133,nou30,nou33,nou39,txt20,txt26,txt3,txt36,txu13,txu20,txu22,txu3,txu9,wcu13
chr512	35464	CPIJ013918	A	G	GAA	GAG	3	120	61	13	46	12	34	6	1	55	12	0.00342598	-0.168916	0.28692	0.663366	0.631579	0.647473	0.658333	0.0257765	-2.22956	txu11,txu4,txu7,txu8,wcu4,wcu6	not40	azu1,azu19,azu8,hct41,hct42,hct46,hct51,hct53,hct56,hct61,hct64,hct66,hct70,hct73,hcu12,hcu15,hcu16,hcu2,hcu30,hcu5,hcu8,hcu9,not15,not4,not46,not7,nou124,nou127,nou129,nou130,nou132,nou133,nou30,nou33,nou39,nou61,txt13,txt19,txt20,txt23,txt3,txt36,txt38,txt40,txt5,txt8,txu13,txu18,txu20,txu22,txu3,txu9,wcu13,wcu19,wcu25	hcu13,hcu17,hcu18,hcu43,not13,not14,not19,not2,not24,not43,nou107,txt26
chr36	432582	CPIJ002680	C	T	CTG	TTG	1	114	19	76	19	6	13	3	8	16	68	0.00394985	-0.204678	0.270833	0.865979	0.352941	0.60946	0.789474	0.0258912	-2.22784	not40,txu12,txu39	txu11,txu21,txu4,txu7,txu8,wcu1,wcu17,wcu4	hct66,hcu16,hcu30,not46,not8,nou107,nou130,nou30,nou39,txt21,txt35,txu18,txu43,wcu16,wcu18,wcu24	azu19,azu3,azu8,hct41,hct42,hct43,hct50,hct51,hct53,hct54,hct56,hct60,hct70,hct73,hcu13,hcu15,hcu17,hcu18,hcu31,hcu32,hcu43,hcu5,hcu8,hcu9,not11,not13,not14,not15,not19,not2,not24,not4,not43,not7,nou1,nou102,nou108,nou124,nou127,nou132,nou133,nou33,nou61,txt13,txt14,txt19,txt23,txt24,txt26,txt3,txt31,txt36,txt38,txt39,txt40,txt5,txt7,txu14,txu20,txu3,txu9,wcu13,wcu2,wcu20,wcu21,wcu25,wcu5,wcu8
chr36	432590	CPIJ002680	C	A	ACC	ACA	3	114	19	76	19	6	13	3	8	16	68	0.00394985	-0.204678	0.270833	0.865979	0.352941	0.60946	0.789474	0.0258912	-2.22784	not40,txu12,txu39	txu11,txu21,txu4,txu7,txu8,wcu1,wcu17,wcu4	hct66,hcu16,hcu30,not46,not8,nou107,nou130,nou30,nou39,txt21,txt35,txu18,txu43,wcu16,wcu18,wcu24	azu19,azu3,azu8,hct41,hct42,hct43,hct50,hct51,hct53,hct54,hct56,hct60,hct70,hct73,hcu13,hcu15,hcu17,hcu18,hcu31,hcu32,hcu43,hcu5,hcu8,hcu9,not11,not13,not14,not15,not19,not2,not24,not4,not43,not7,nou1,nou102,nou108,nou124,nou127,nou132,nou133,nou33,nou61,txt13,txt14,txt19,txt23,txt24,txt26,txt3,txt31,txt36,txt38,txt39,txt40,txt5,txt7,txu14,txu20,txu3,txu9,wcu13,wcu2,wcu20,wcu21,wcu25,wcu5,wcu8
chr35	864866	CPIJ002538	A	T	CAT	CTT	2	122	40	23	59	13	46	6	0	34	23	0.00336423	-0.150572	0.265385	0.553398	0.684211	0.618804	0.57377	0.0261222	-2.22439	not40,txu12,txu2,txu40,wcu4,wcu6		hct41,hct51,hct60,hct64,hct66,hct73,hcu12,hcu2,hcu30,hcu31,hcu9,not13,not14,not19,nou107,nou124,nou129,nou130,nou30,nou39,txt13,txt20,txt23,txt24,txt26,txt29,txt3,txt31,txt35,txt36,txt5,txt8,txu13,txu6	hcu32,hcu8,not11,not15,not2,not24,not4,not43,not46,not7,not8,nou1,nou102,nou104,nou108,nou127,nou132,nou133,nou134,nou33,txt19,txt21,txu9
chr36	92201	CPIJ002663	T	C	GAT	GAC	3	121	49	35	37	9	28	7	2	42	33	0.00651226	-0.150806	0.316872	0.728155	0.5	0.614078	0.694215	0.0270328	-2.21104	not40,txu21,txu31,txu39,wcu12,wcu17,wcu4	txu12,txu8	azu19,azu28,azu5,azu6,hct56,hct60,hct65,hct66,hct70,hcu13,hcu16,hcu2,not24,not43,not8,nou1,nou108,nou130,nou132,nou133,nou30,nou39,txt14,txt19,txt20,txt29,txt35,txt36,txt38,txt40,txt8,txu3,txu9,wcu10,wcu13,wcu16,wcu18,wcu20,wcu24,wcu25,wcu5,wcu8	azu1,hct41,hct43,hct46,hct50,hct51,hct54,hct61,hct64,hct73,hcu15,hcu17,hcu30,hcu31,hcu32,hcu43,hcu9,not11,not13,not46,nou102,nou107,nou124,nou127,nou129,nou134,txt21,txt3,txu13,txu18,txu43,wcu2,wcu21
chr1	1200453	CPIJ000062	A	C	AGG (CCT)	CGG (CCG)	3	16	1	11	4	2	2	1	0	0	11	0.00980513	-0.456522	0.0454545	0.846154	0.666667	0.75641	0.8125	0.0274374	-2.20524	txu40			azu6,not14,not43,nou104,nou30,txt14,txt23,txt24,txt35,txt38,txu43
chr1	1200462	CPIJ000062	G	A	GTT (AAC)	ATT (AAT)	3	16	1	11	4	2	2	1	0	0	11	0.00980513	-0.456522	0.0454545	0.846154	0.666667	0.75641	0.8125	0.0274374	-2.20524	txu40			azu6,not14,not43,nou104,nou30,txt14,txt23,txt24,txt35,txt38,txu43
chr512	31696	CPIJ013917	T	A	CGT (ACG)	CGA (TCG)	1	121	10	48	63	12	51	3	2	7	46	0.0063047	-0.124438	0.300505	0.509615	0.705882	0.607749	0.53719	0.0303841	-2.16505	txu21,txu4,txu40	wcu4,wcu6	hct56,hct66,not13,not46,nou130,nou33,txt36	azu19,azu8,hct41,hct42,hct46,hct51,hct53,hct61,hct64,hct70,hct73,hcu13,hcu15,hcu16,hcu17,hcu18,hcu2,hcu30,hcu5,hcu8,hcu9,not14,not15,not43,not7,nou104,nou107,nou124,nou127,nou129,nou132,nou133,nou30,nou39,txt20,txt23,txt3,txt38,txt5,txu13,txu20,txu22,txu3,txu9,wcu13,wcu25
chr104	245813	CPIJ005956	C	T	GTC	GTT	3	124	9	114	1	1	0	2	16	7	98	0.0221511	-0.85654	0	1	0.0526316	0.526316	0.854839	0.0305896	-2.16237	txu40,wcu1	not40,sebq,txu11,txu2,txu21,txu31,txu39,txu4,txu7,txu8,wcu11,wcu12,wcu15,wcu17,wcu4,wcu6	hct66,nou124,txt14,txt20,txt38,txt7,txu14	azu1,azu19,azu28,azu3,azu5,azu6,azu8,hct41,hct42,hct43,hct46,hct50,hct51,hct53,hct54,hct56,hct60,hct61,hct64,hct70,hct73,hcu12,hcu13,hcu15,hcu16,hcu17,hcu18,hcu2,hcu30,hcu31,hcu32,hcu43,hcu5,hcu8,hcu9,not11,not13,not14,not15,not19,not2,not24,not4,not43,not46,not7,not8,nou1,nou102,nou104,nou107,nou108,nou127,nou129,nou130,nou132,nou133,nou134,nou30,nou33,nou39,nou61,txt13,txt19,txt21,txt23,txt24,t…
chr281	98232	CPIJ010805	T	C	TTT (AAA)	CTT (AAG)	3	116	23	82	11	4	7	4	9	19	73	0.00549977	-0.245989	0.233333	0.929293	0.235294	0.582294	0.827586	0.0306189	-2.16199	txu11,txu40,txu7,wcu4	not40,sebq,txu12,txu2,txu21,txu4,wcu11,wcu17,wcu6	azu1,hct60,hct66,hct73,hcu15,hcu8,hcu9,not2,not4,not43,nou108,txt23,txu18,txu22,txu3,txu43,txu9,wcu18,wcu20	azu19,azu28,azu3,azu5,azu6,azu8,hct41,hct42,hct43,hct46,hct50,hct51,hct53,hct54,hct56,hct61,hct64,hcu12,hcu13,hcu16,hcu17,hcu18,hcu2,hcu30,hcu31,hcu43,hcu5,not11,not13,not14,not15,not19,not24,not46,not7,not8,nou102,nou104,nou107,nou124,nou127,nou129,nou130,nou132,nou133,nou134,nou30,nou33,nou39,nou61,txt13,txt20,txt24,txt26,txt3,txt31,txt35,txt36,txt38,txt39,txt40,txt7,txu13,txu20,txu6,wcu13,wcu1…
chr792	4841	CPIJ016681	T	G	CCT (AGG)	CCG (CGG)	1	117	41	58	18	7	11	4	7	37	51	0.000257848	-0.274239	0.203494	0.888889	0.388889	0.638889	0.811966	0.031459	-2.15122	txu2,txu39,wcu11,wcu12	txu12,txu21,txu4,txu40,txu8,wcu1,wcu17	azu1,azu19,azu28,azu3,azu5,azu6,hct51,hct53,hct54,hct56,hct60,hct61,hct64,hct70,hct73,hcu15,hcu17,hcu43,not46,nou124,nou127,nou129,nou130,nou132,nou33,nou39,txt19,txt20,txt40,txt8,txu3,txu9,wcu10,wcu14,wcu16,wcu19,wcu21	azu8,hct46,hct65,hct66,hcu12,hcu13,hcu16,hcu2,hcu30,hcu31,hcu5,hcu8,not11,not13,not15,not19,not2,not24,not4,not43,not7,not8,nou1,nou102,nou107,nou108,nou133,nou134,nou30,nou61,txt14,txt21,txt23,txt26,txt29,txt3,txt36,txt39,txt7,txu13,txu14,txu18,txu43,txu6,wcu13,wcu2,wcu20,wcu24,wcu25,wcu5,wcu8
chr104	240586	CPIJ005953	T	C	TTT	TTC	3	125	56	14	55	13	42	5	1	51	13	0.00636968	-0.15303	0.293706	0.603774	0.684211	0.643992	0.616	0.0318014	-2.1469	not40,txu4,wcu11,wcu15,wcu17	sebq	azu6,azu8,hct50,hct51,hct53,hct56,hct61,hct64,hct66,hct70,hct73,hcu13,hcu15,hcu16,hcu17,hcu18,hcu31,not11,not13,not15,not19,not46,not8,nou1,nou107,nou108,nou127,nou129,nou130,nou132,nou134,nou30,nou39,nou61,txt14,txt19,txt38,txt7,txu14,txu20,txu3,txu43,txu9,wcu10,wcu19,wcu2,wcu21,wcu24,wcu25,wcu5,wcu8	azu1,azu19,azu28,azu3,azu5,hct43,hct46,hct54,hct65,hcu12,hcu32,hcu43,txu13
chr278	365769	CPIJ010544	C	A	GCC	GCA	3	122	55	28	39	9	30	9	1	46	27	0.0228365	-0.13167	0.366667	0.708738	0.473684	0.591211	0.672131	0.0335642	-2.12527	not40,txu2,txu21,txu4,wcu1,wcu11,wcu15,wcu17,wcu6	wcu4	azu19,azu28,azu6,azu8,hct41,hct42,hct50,hct54,hct60,hct64,hct66,hct73,hcu17,hcu31,hcu5,not15,not2,not7,not8,nou1,nou132,nou133,nou134,nou30,nou39,txt14,txt20,txt23,txt24,txt29,txt31,txt35,txt39,txt40,txt5,txt8,txu14,txu22,txu3,txu43,txu9,wcu13,wcu20,wcu25,wcu5,wcu8	azu1,azu3,hct43,hct46,hct53,hct56,hct70,hcu13,hcu15,hcu16,hcu2,hcu30,hcu32,hcu43,hcu8,hcu9,not13,not24,not4,not46,nou127,nou129,nou130,nou33,txt21,txu20,wcu18
chr104	240574	CPIJ005953	C	T	GCC	GCT	3	124	55	14	55	13	42	5	1	50	13	0.00644575	-0.152026	0.297571	0.6	0.684211	0.642105	0.612903	0.0337371	-2.1232	not40,txu4,wcu11,wcu15,wcu17	sebq	azu6,azu8,hct50,hct51,hct53,hct56,hct61,hct64,hct66,hct70,hct73,hcu13,hcu15,hcu17,hcu18,hcu31,not11,not13,not15,not19,not46,not8,nou1,nou107,nou108,nou127,nou129,nou130,nou132,nou134,nou30,nou39,nou61,txt14,txt19,txt38,txt7,txu14,txu20,txu3,txu43,txu9,wcu10,wcu19,wcu2,wcu21,wcu24,wcu25,wcu5,wcu8	azu1,azu19,azu28,azu3,azu5,hct43,hct46,hct54,hct65,hcu12,hcu32,hcu43,txu13
chr104	253970	CPIJ005959	A	C	ACC	CCC	1	121	39	77	5	2	3	8	8	31	69	0.0340882	-0.275648	0.213018	0.970874	0.111111	0.540992	0.842975	0.0351392	-2.10675	txu11,txu2,txu31,txu7,txu8,wcu15,wcu17,wcu4	not40,txu12,txu21,txu39,txu4,txu40,wcu1,wcu12	azu8,hct41,hct43,hct46,hct54,hct60,hcu15,hcu16,hcu18,hcu2,hcu30,hcu32,hcu43,hcu8,not13,not19,not8,nou124,nou129,nou61,txt7,txu20,txu43,txu6,wcu14,wcu16,wcu18,wcu19,wcu20,wcu5,wcu8	azu1,azu19,azu28,azu5,azu6,hct42,hct50,hct51,hct53,hct56,hct61,hct64,hct65,hct66,hct70,hct73,hcu12,hcu13,hcu17,hcu31,hcu5,hcu9,not11,not15,not2,not24,not4,not43,not46,not7,nou1,nou102,nou104,nou107,nou108,nou127,nou130,nou132,nou133,nou134,nou30,nou33,nou39,txt13,txt14,txt19,txt20,txt21,txt23,txt26,txt29,txt3,txt35,txt36,txt38,txt39,txt40,txt5,txt8,txu14,txu18,txu22,txu3,txu9,wcu10,wcu13,wcu21,wc…
chr104	253966	CPIJ005959	C	T	TTC	TTT	3	121	39	77	5	2	3	8	8	31	69	0.0340882	-0.275648	0.213018	0.970874	0.111111	0.540992	0.842975	0.0351392	-2.10675	txu11,txu2,txu31,txu7,txu8,wcu15,wcu17,wcu4	not40,txu12,txu21,txu39,txu4,txu40,wcu1,wcu12	azu8,hct41,hct43,hct46,hct54,hct60,hcu15,hcu16,hcu18,hcu2,hcu30,hcu32,hcu43,hcu8,not13,not19,not8,nou124,nou129,nou61,txt7,txu20,txu43,txu6,wcu14,wcu16,wcu18,wcu19,wcu20,wcu5,wcu8	azu1,azu19,azu28,azu5,azu6,hct42,hct50,hct51,hct53,hct56,hct61,hct64,hct65,hct66,hct70,hct73,hcu12,hcu13,hcu17,hcu31,hcu5,hcu9,not11,not15,not2,not24,not4,not43,not46,not7,nou1,nou102,nou104,nou107,nou108,nou127,nou130,nou132,nou133,nou134,nou30,nou33,nou39,txt13,txt14,txt19,txt20,txt21,txt23,txt26,txt29,txt3,txt35,txt36,txt38,txt39,txt40,txt5,txt8,txu14,txu18,txu22,txu3,txu9,wcu10,wcu13,wcu21,wc…
chr104	253975	CPIJ005959	C	T	AGC	AGT	3	121	39	77	5	2	3	8	8	31	69	0.0340882	-0.275648	0.213018	0.970874	0.111111	0.540992	0.842975	0.0351392	-2.10675	txu11,txu2,txu31,txu7,txu8,wcu15,wcu17,wcu4	not40,txu12,txu21,txu39,txu4,txu40,wcu1,wcu12	azu8,hct41,hct43,hct46,hct54,hct60,hcu15,hcu16,hcu18,hcu2,hcu30,hcu32,hcu43,hcu8,not13,not19,not8,nou124,nou129,nou61,txt7,txu20,txu43,txu6,wcu14,wcu16,wcu18,wcu19,wcu20,wcu5,wcu8	azu1,azu19,azu28,azu5,azu6,hct42,hct50,hct51,hct53,hct56,hct61,hct64,hct65,hct66,hct70,hct73,hcu12,hcu13,hcu17,hcu31,hcu5,hcu9,not11,not15,not2,not24,not4,not43,not46,not7,nou1,nou102,nou104,nou107,nou108,nou127,nou130,nou132,nou133,nou134,nou30,nou33,nou39,txt13,txt14,txt19,txt20,txt21,txt23,txt26,txt29,txt3,txt35,txt36,txt38,txt39,txt40,txt5,txt8,txu14,txu18,txu22,txu3,txu9,wcu10,wcu13,wcu21,wc…
chr278	371175	CPIJ010546	T	C	TCC (GGA)	CCC (GGG)	3	124	26	91	7	4	3	3	12	23	79	0.000267511	-0.441621	0.111878	0.971429	0.210526	0.590977	0.854839	0.0356506	-2.10089	sebq,txu39,wcu1	not40,txu12,txu2,txu21,txu31,txu4,txu8,wcu11,wcu15,wcu17,wcu4,wcu6	hct60,hct66,hcu12,hcu17,not14,not2,not43,not7,not8,nou102,nou107,nou133,nou134,txt19,txt23,txt24,txt26,txt3,txt36,txt8,txu13,txu18,txu22	azu1,azu19,azu28,azu3,azu5,azu6,azu8,hct41,hct42,hct43,hct46,hct50,hct51,hct53,hct54,hct56,hct61,hct64,hct65,hct70,hct73,hcu13,hcu15,hcu16,hcu18,hcu2,hcu30,hcu31,hcu32,hcu43,hcu5,hcu8,hcu9,not11,not13,not15,not19,not24,not4,not46,nou1,nou104,nou108,nou124,nou127,nou129,nou130,nou132,nou33,nou39,nou61,txt14,txt20,txt21,txt29,txt31,txt35,txt38,txt39,txt40,txt5,txu14,txu20,txu3,txu43,txu6,txu9,wcu10…
chr39	62248	CPIJ003082	A	G	AAA	AAG	3	125	64	30	31	7	24	11	1	53	29	0.0449436	-0.120968	0.401544	0.773585	0.368421	0.571003	0.712	0.0377704	-2.07734	not40,txu11,txu2,txu21,txu39,txu7,txu8,wcu11,wcu12,wcu17,wcu6	txu12	azu6,hct42,hct43,hct50,hct56,hct60,hct61,hct65,hcu13,hcu16,hcu17,hcu18,hcu31,hcu43,hcu5,hcu9,not11,not15,not19,not46,not8,nou108,nou127,nou132,nou30,nou33,nou39,nou61,txt14,txt19,txt21,txt3,txt31,txt38,txt40,txt5,txt7,txu13,txu14,txu20,txu22,txu3,txu43,txu9,wcu10,wcu16,wcu18,wcu19,wcu2,wcu20,wcu21,wcu5,wcu8	hct41,hct46,hct53,hct54,hct73,hcu12,hcu30,hcu32,not13,not14,not2,not24,not4,not43,nou1,nou124,nou129,nou130,nou133,nou134,txt13,txt24,txt26,txt35,txt36,txt8,txu6,wcu13,wcu25
chr1224	36635	CPIJ018627	C	T	GCC	GCT	3	51	2	43	6	3	3	0	6	2	37	0.00709213	-0.363636	0.157895	0.928571	0.333333	0.630952	0.823529	0.0381533	-2.0732		not40,txu12,txu2,wcu11,wcu12,wcu4	hcu8,wcu5	azu3,azu5,azu8,hct65,hcu30,hcu5,not11,not19,not2,not24,not4,not46,not7,nou107,nou108,nou132,nou133,nou30,nou39,nou61,txt14,txt20,txt3,txt36,txt5,txt7,txu13,txu18,txu22,txu43,txu6,wcu13,wcu14,wcu16,wcu18,wcu2,wcu20
chr278	365829	CPIJ010544	C	G	CGC	CGG	3	122	55	34	33	7	26	11	1	44	33	0.0524643	-0.10643	0.438961	0.747573	0.368421	0.557997	0.688525	0.0388662	-2.0656	not40,txu2,txu21,txu31,txu4,txu8,wcu1,wcu11,wcu12,wcu17,wcu6	wcu4	azu19,azu28,azu6,azu8,hct41,hct42,hct54,hct60,hct64,hct66,hct73,hcu17,not15,not2,not7,not8,nou1,nou108,nou124,nou132,nou133,nou134,nou30,nou39,nou61,txt14,txt20,txt23,txt24,txt29,txt31,txt35,txt39,txt40,txt5,txt8,txu14,txu22,txu43,wcu13,wcu20,wcu25,wcu5,wcu8	azu1,azu3,hct43,hct46,hct50,hct53,hct56,hct70,hcu13,hcu15,hcu16,hcu2,hcu30,hcu31,hcu32,hcu43,hcu5,hcu8,hcu9,not13,not24,not4,not46,nou127,nou129,nou130,nou33,txt21,txu20,txu3,txu9,wcu18,wcu24
chr278	372480	CPIJ010546	T	G	TAT (ATA)	GAT (ATC)	3	113	18	77	18	6	12	2	9	16	68	0.00365264	-0.217054	0.263158	0.875	0.352941	0.613971	0.79646	0.0411177	-2.04234	txu40,wcu1	not40,txu2,txu21,txu4,wcu11,wcu15,wcu17,wcu4,wcu6	hct66,hcu12,hcu17,not15,not7,not8,nou130,nou133,nou134,nou30,txt19,txt23,txt8,txu13,txu18,txu22	azu1,azu19,azu28,azu3,azu6,azu8,hct41,hct42,hct43,hct46,hct50,hct51,hct53,hct54,hct56,hct60,hct64,hct70,hct73,hcu13,hcu15,hcu16,hcu2,hcu30,hcu31,hcu32,hcu43,hcu5,hcu8,hcu9,not13,not19,not2,not24,not4,not46,nou1,nou102,nou127,nou129,nou132,nou33,nou39,nou61,txt14,txt20,txt21,txt29,txt31,txt35,txt38,txt39,txt40,txt5,txu14,txu20,txu3,txu43,txu9,wcu13,wcu14,wcu18,wcu19,wcu2,wcu20,wcu25,wcu5,wcu8
chr104	241764	CPIJ005954	T	C	GTG	GCG	2	124	57	14	53	12	41	5	1	52	13	0.0095685	-0.144062	0.306624	0.613208	0.666667	0.639937	0.620968	0.0413259	-2.04025	not40,txu4,wcu11,wcu15,wcu17	txu12	azu1,azu19,azu28,azu3,azu5,azu6,azu8,hct41,hct50,hct51,hct56,hct64,hct66,hct70,hct73,hcu13,hcu15,hcu16,hcu17,hcu18,hcu31,not11,not13,not19,not46,not8,nou1,nou107,nou108,nou127,nou129,nou130,nou132,nou134,nou30,nou33,nou39,nou61,txt14,txt19,txt20,txt38,txt40,txt7,txu14,txu43,txu9,wcu10,wcu24,wcu25,wcu5,wcu8	hct43,hct46,hct54,hct61,hct65,hcu12,hcu32,hcu43,txu13,txu3,wcu19,wcu2,wcu21
chr869	113525	CPIJ016851	T	C	a	CCT (AGG)	3	86	5	45	36	8	28	1	3	4	42	0.00687235	-0.148538	0.278409	0.621622	0.666667	0.644144	0.627907	0.0448551	-2.00601	txu40	not40,wcu15,wcu17	txt31,txu18,txu20,wcu20	hct41,hct43,hct50,hct54,hct61,hct66,hct70,hcu18,hcu2,hcu30,hcu43,hcu9,not11,not13,not14,not15,not19,not24,not4,not43,not46,not8,nou107,nou124,nou127,nou130,nou133,nou30,nou33,nou39,nou61,txt13,txt20,txt39,txt40,txu13,txu9,wcu10,wcu13,wcu14,wcu5,wcu8
chr104	240661	CPIJ005953	G	A	CCG	CCA	3	124	52	9	63	14	49	5	0	47	9	0.00876815	-0.150794	0.269231	0.533333	0.736842	0.635088	0.564516	0.0452662	-2.00217	not40,txu4,wcu11,wcu15,wcu17		azu1,azu19,azu28,azu5,azu6,azu8,hct50,hct51,hct56,hct64,hct70,hct73,hcu13,hcu15,hcu16,hcu17,hcu18,hcu31,hcu32,not13,not15,not19,not8,nou107,nou108,nou127,nou129,nou132,nou134,nou33,nou61,txt14,txt19,txt38,txt7,txu14,txu3,txu43,txu9,wcu10,wcu19,wcu2,wcu21,wcu24,wcu25,wcu5,wcu8	azu3,hct43,hct46,hct54,hct61,hct65,hcu12,hcu43,txu13
chr39	62215	CPIJ003082	G	A	CGG	CGA	3	125	28	2	95	19	76	0	0	28	2	0.00198588	-0.2	0	0.283019	1	0.641509	0.392	0.0467095	-1.98892			hct41,hct46,hct53,hct56,hct60,hct61,hct73,hcu12,hcu13,hcu31,not13,not24,nou1,nou129,nou39,txt14,txt19,txt24,txt26,txt35,txt38,txt8,txu6,wcu13,wcu16,wcu19,wcu20,wcu21	hcu32,txt13
chr281	97920	CPIJ010805	T	A	TCC (GGA)	ACC (GGT)	3	125	37	7	81	17	64	1	1	36	6	0.0111019	-0.151053	0.235294	0.396226	0.894737	0.645482	0.472	0.0473582	-1.98308	not40	wcu17	azu19,hct51,hct53,hct54,hct61,hct66,hct73,hcu12,hcu15,hcu17,hcu2,hcu5,hcu8,not15,not24,not7,not8,nou107,nou124,nou127,nou129,nou130,nou133,nou134,nou30,nou33,nou39,txt20,txt3,txt38,txt40,txu22,txu3,txu9,wcu18,wcu21	hct46,hct64,hcu31,nou132,wcu5,wcu8
aCodons in parentheses are relevant ones when the opposite strand was originally sequenced in the genome.
